# Supplementary material for: A platform for rapid prototyping of synthetic gene networks in mammalian cells
Source: PubMed Central journal article supplement — Nucleic Acids Res. 2014 Nov 5;42(21):13440–51. doi: 10.1093/nar/gku1082 (PMC4245948; doi:10.1093/nar/gku1082), 2014-11-05
Supplement: supp_gku1082_nar-00901-h-2014-File007.pdf [file supp_gku1082_nar-00901-h-2014-File007.pdf]

## SUPPLEMENTARY INFORMATION

### **A platform for rapid prototyping of synthetic gene networks in mammalian cells**

Xavier Duportet<sup>1,2,4</sup>, Liliana Wroblewska<sup>2</sup>, Patrick Guye<sup>2</sup>, Yinqing Li<sup>2</sup>, Justin Eyquem<sup>3</sup>, Julianne Rieders<sup>1,4</sup>, Gregory Batt<sup>1</sup> and Ron Weiss<sup>2</sup>

<sup>1</sup>INRIA Paris-Rocquencourt, Rocquencourt, France, <sup>2</sup>Synthetic Biology Center, Department of Biological Engineering, Massachusetts Institute of Technology, Cambridge, USA, <sup>3</sup>Collectis Therapeutics, Paris, France, <sup>4</sup>Laboratoire Matière et Systèmes Complexes, Centre National de la Recherche Scientifique and Université Paris Diderot, Paris, France

Correspondence should be addressed to X.D. (xavier.duportet@phagex.com), G.B. (gregory.batt@inria.fr) or R.W. (rweiss@mit.edu).

#### **Supplementary Figures**

**Supplementary Figure 1.** Non-homogeneity of transgene expression after zinc-finger nuclease mediated integration of a 4-gene circuit.

**Supplementary Figure 2.** Landing pad chassis cell line construction: Southern blot genomic analysis of landing pad integration with zinc-finger nuclease in wild-type cells.

**Supplementary Figure 3.** Landing pad chassis cell line construction: PCR confirmations of mono-allelic landing pad integration.

**Supplementary Figure 4.** Details of the mMoClo backbones used in the assembly workflow depicted in Figure 2.

**Supplementary Figure 5.** Effect of nucleotide sequence optimization and nuclear localization signal on the integration efficiency of BxB1 recombinase.

**Supplementary Figure 6.** Influence of vector ratios (BxB1 expression vector vs. integration vector) on the integration efficiency.

**Supplementary Figure 7.** Microscopy images of different model chassis cell lines after integration of a simple circuit.

**Supplementary Figure 8.** Comparison of circuit integration efficiency in three different chassis cell lines.

**Supplementary Figure 9.** Flow cytometry analysis of chassis cell line fluorescence before and after integration of circuits and selection with puromycin.

**Supplementary Figure 10.** Specificity of integration into the landing pad: Southern blot genomic analysis assessing the specificity of BxB1 mediated integration.

**Supplementary Figure 11.** Sequence alignment of insert flanking sequences of the 42 isolated clones.

**Supplementary Figure 12.** Circuit performance in HeLa and CHO chassis cell-lines.

**Supplementary Figure 13.** Early genomic rearrangement of the 7-gene payload following transfection.

**Supplementary Figure 14.** Microscopy images of isolated colonies representing the 18 different phenotypes of the circuit library.

**Supplementary Figure 15.** Annotated maps of vectors used in this study.

#### **Supplementary Table**

**Supplementary Table 1.** Comparison of integration efficiencies of different recombinases.

#### **Supplementary Text**

**Supplementary Text 1.** DNA sequences of the probes used for the Southern Blots.

**Supplementary Text 2.** DNA sequences of the primers used for genomic PCRs.

**Supplementary Text 3.** DNA sequences of the genetic components from our mammalian parts library used in this study.

**Supplementary Text 4.** DNA sequences of all plasmids from the mMoclo library.

**Supplementary Figure 1. Non-homogeneity of transgene expression after zinc-finger nuclease mediated integration of a 4-gene circuit.**

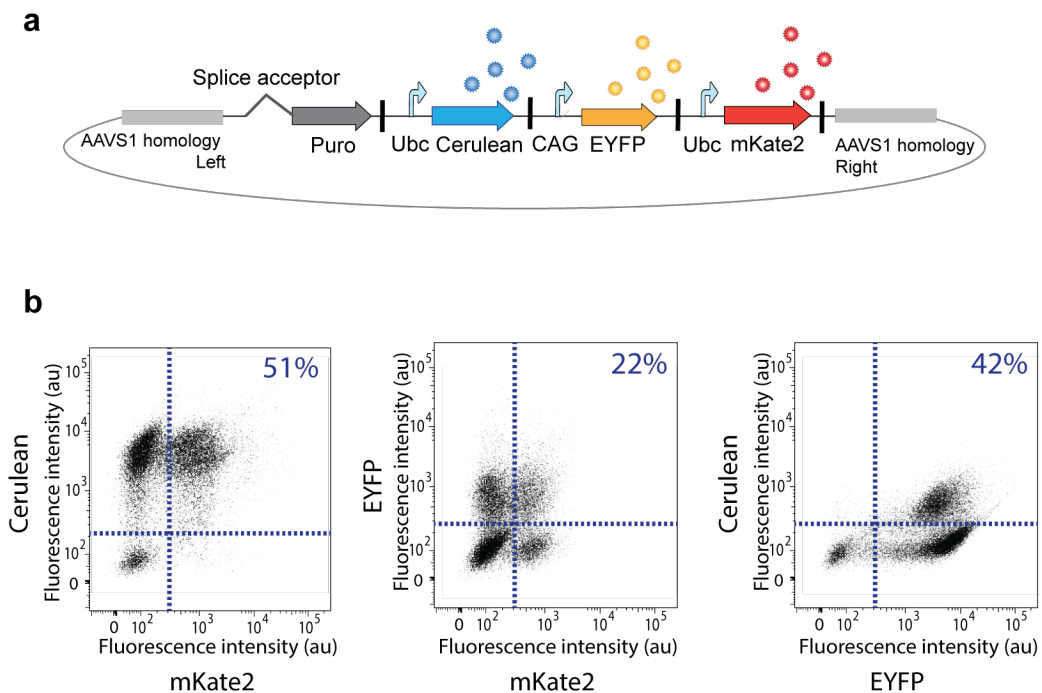

**(a)** Schematic representation of the 4-gene circuit used for integration; the circuit comprises (1) a promoterless puromycin resistance gene activated only after integration in the AAVS1 locus<sup>1</sup>, (2) Ubc promoter constitutively expressing a Cerulean reporter, (3) CAG promoter constitutively expressing an EYFP reporter and (4) Ubc promoter constitutively expressing an mKate2 reporter. AAVS1 homology regions flank the circuit to target integrations into the AAVS1 locus. **(b)** Representative two-dimensional fluorescence density plots demonstrating significant heterogeneity in reporter expression levels within the polyclonal population of cells after integration of the circuit and selection with Puromycin. Selection was started 3 days post transfection and cells were assayed 14 days post transfection.

**Supplementary Figure 2. Landing pad chassis cell line construction: Southern blot genomic analysis of landing pad integration with zinc-finger nuclease in wild-type cells.**

**A**

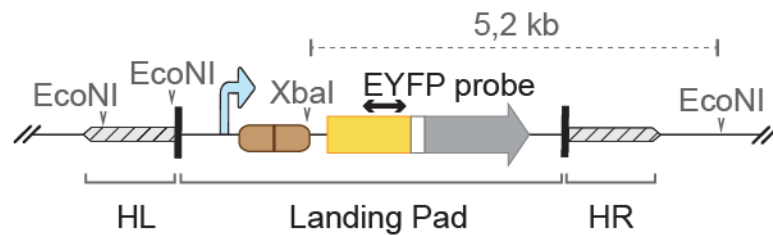

**B**

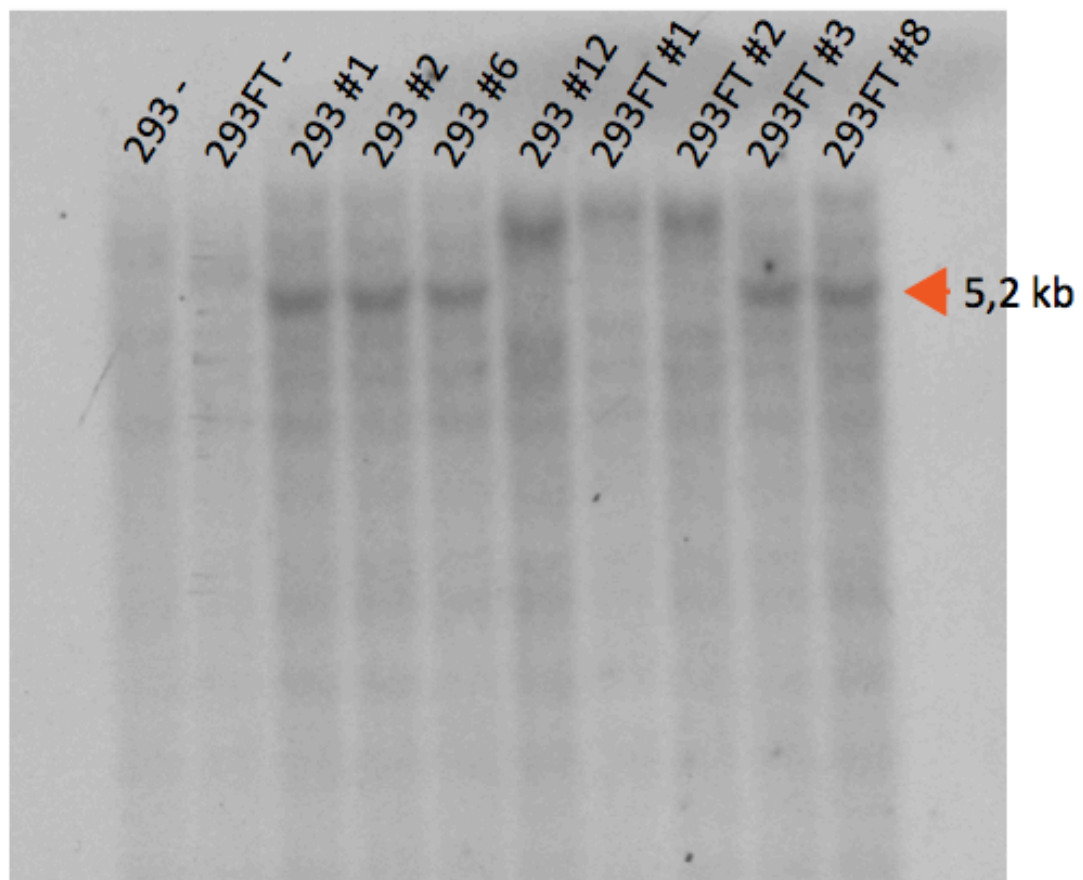

**(A)** Schematic of the Southern probe and the restriction enzyme cut sites. The landing pad is inserted between the left homology and right homology sequences (HL & HR). The 300 bp probe used for the Southern Blots corresponds to an internal sequence of EYFP. Digestion of chromosomal DNA with EcoNI and XbaI results in a 5.2kb band containing the EYFP gene for the correct clones.

**(B)** Wild-type cell lines of HEK293FT and HEK293 with no landing pad were used as negative controls (first two lanes on the left). Integration in the correct locus was confirmed for 3 out of 4 clones for HEK293 cell lines, and for 2 out of 4 clones for HEK293FT. Clone HEK293FT#8 (denoted in the text as HEK293FT-LP) was chosen as the monoclonal chassis cell line for all downstream circuit integrations.

**Supplementary Figure 3. Landing pad chassis cell line validation: PCR confirmations of mono-allelic landing pad integration.**

**A**

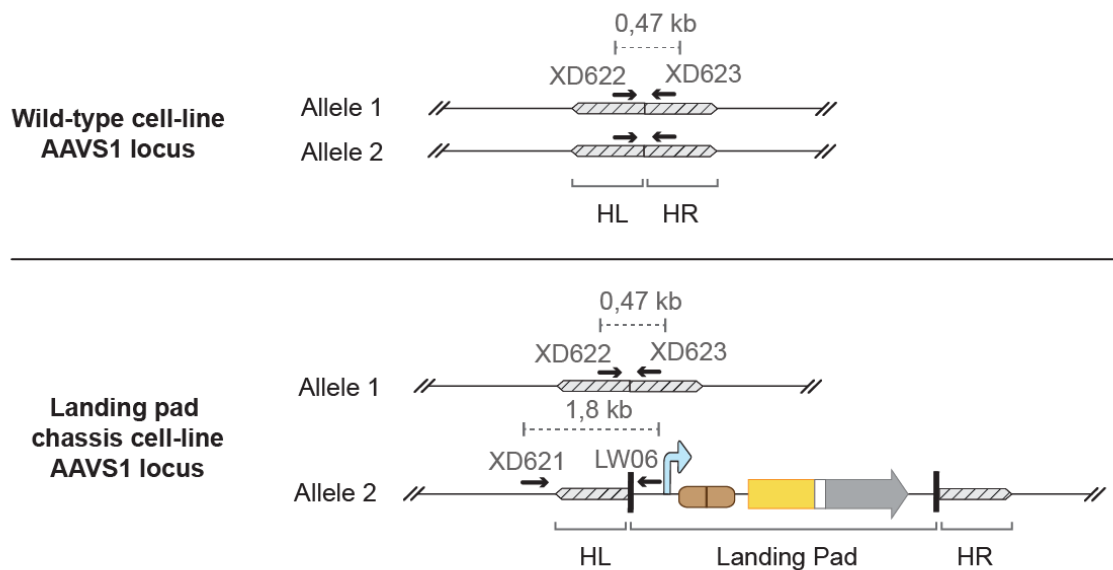

**B**

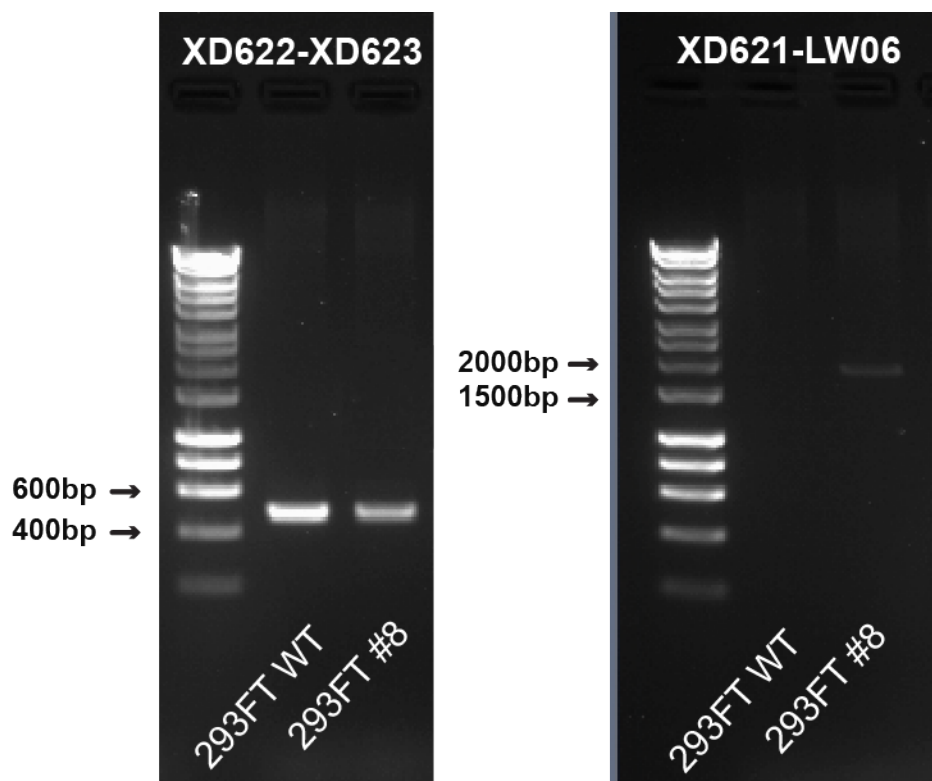

(A) Schematic of the PCRs and primers used. Primers XD622 and XD623 allow amplification of a 0.47kb sequence that overlaps the ZFN cleavage site within the AAVS1 locus. XD622 and XD623 are respectively located within the Left Homology arm (HL) and the Right Homology arm (HR) used for integration of the landing pad. The primers XD621 and LW06 allow amplification of a 1.8kb sequence when the landing pad is specifically inserted in the AAVS1 locus in the right orientation.

(B) PCR gels on WT and Chassis cell lines. Control PCRs on the wild type cell line with the two primer pairs resulted in a single band at 0.47kb and no band at 1.8kb. PCRs on the chassis cell line resulted in both a band at 0.47kb and a band at 1.8kb, confirming the presence of one non-modified allele and one allele carrying the landing pad.

**Supplementary Figure 4.** Details of the mMoClo backbones used in the assembly workflow depicted in Figure 2.

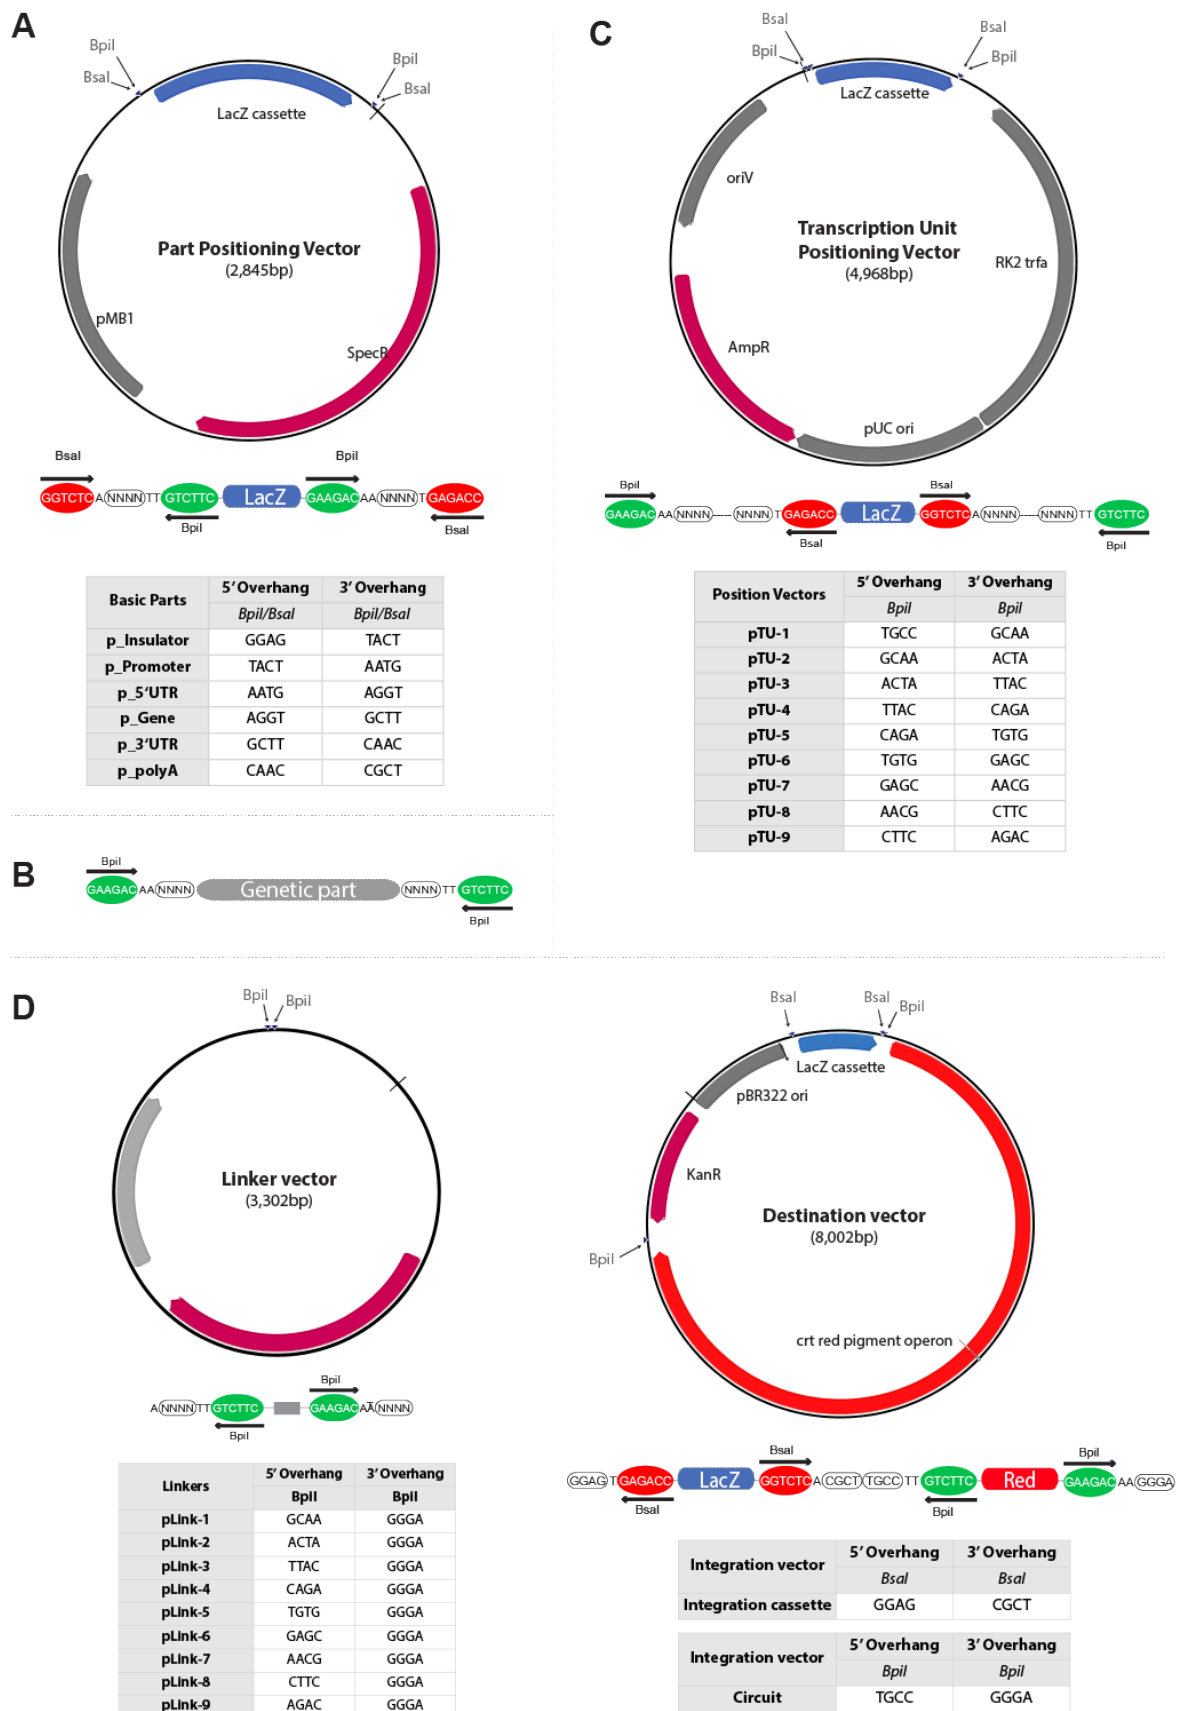

The mMoClo library includes a library of empty backbones that are used to assemble (multi)gene circuits. **(A)** The Part Positioning Vectors are used to create a library of single genetic parts (required later to build functional transcription units): Insulator, Promoter, 5'UTR, Gene coding sequence, 3'UTR and polyA signal. **(B)** To clone a genetic part into the spectinomycin resistant Part Positioning Vector of choice, the part has to be flanked by a BpiI restriction site on each end, together with 4bp overhangs matching the ones from the desired Part Positioning Vector. The BpiI mediated Golden Gate reaction between the genetic part and the Part Positioning Vector replaces the lacZ cassette with the desired genetic part into the Part Positioning Vector and thus allows a rapid and easy visual blue/white screening of the transformed bacteria. The library Part vector created this way does not contain BpiI restriction sites anymore. **(C)** To create a functional transcription unit, the BsaI mediated Golden Gate reaction requires the presence of 6 plasmids: 1 Insulator plasmid, 1 Promoter plasmid, 1 5'UTR plasmid, 1 Gene plasmid, 1 3'UTR plasmid, 1 polyA plasmid (all from the library of parts) and 1 ampicillin resistant Transcription Unit Positioning Vector. Assembly of the transcription unit into the latter one replaces the lacZ cassette and thus allows a rapid and easy visual blue/white screening of the transformed bacteria. The choice of the pTU (Transcription Unit positioning Vector) is directly linked to the position of transcription unit in the final circuit. The transcription unit vector created this way does not contain BsaI restriction sites anymore. **(D)** To create an integration vector (containing a BxB1 recombination site) that is used to assemble a complete circuit, an integration cassette is assembled first into the kanamycin resistant Destination vector, using a mock promoter part together with the BxB1 attB site as the 5'UTR part and a fluorescence/resistance marker of choice for the Gene part. Assembly of this promoterless transcription unit replaces the lacZ gene from the Destination Vector, allowing for a red/green selection of the transformed bacteria. Before this step, the destination vector expresses both lacZ gene and the *crt* red pigment operon, resulting in green pigmentation of the bacteria carrying an intact Destination Vector. The integration vector assembled this way can then be repeatedly used to assemble multi-gene circuits with a BpiI based Golden Gate reaction by combining a set of assembled transcription unit vectors (following each other) together with the linker vector corresponding to the position of the last transcription unit vector. The assembled circuit replaces the *crt* red pigment producing operon and thus allows for easy read/white screening to pick the correct clones.

**Supplementary Figure 5. Effect of nucleotide sequence optimization and nuclear localization signal on the integration efficiency of BxB1 recombinase.**

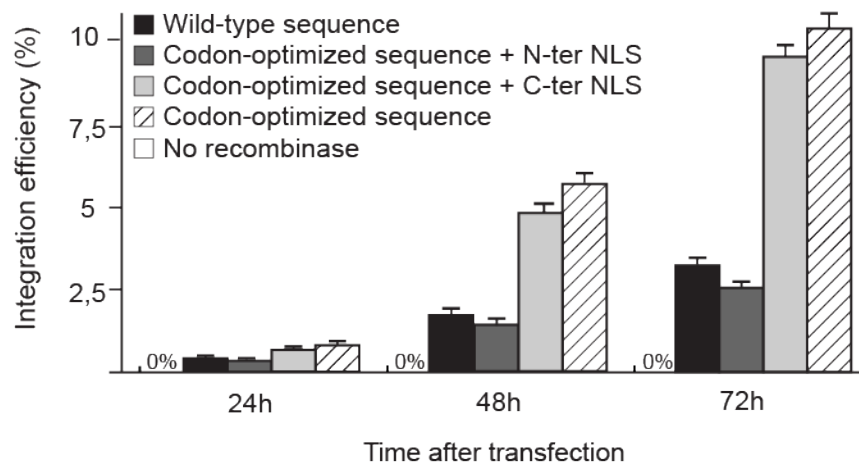

A 12kb integrative plasmid comprising a promoterless Puromycin-2A-mKate2 followed by constitutively expressed Cerulean was co-transfected with BxB1 expressing plasmid into the HEK293FT-LP chassis cell line. Integration efficiency was measured as percentage of mKate2 positive cells within the transfected cell population. The number of cells expressing mKate2 increased with time and reached a maximum 3 days after transfection (we monitored the expression of mKate2 up to 10 days post-transfection, data not shown). Nuclear Localization Signal (NLS) fusion to BxB1 did not improve the integration efficiency. When NLS was added at the N-terminus of the recombinase, significant negative impact on integration efficiency was observed. Our hypothesis is that in this case the NLS may sterically interfere with the N-terminal domain involved in the catalytic cleavage and ligation of DNA. Error bars represent standard deviation from 3 independently repeated experiments.



**Supplementary Figure 6. Influence of vector ratios (BxB1 expression vector vs integration vector) on integration efficiency.**

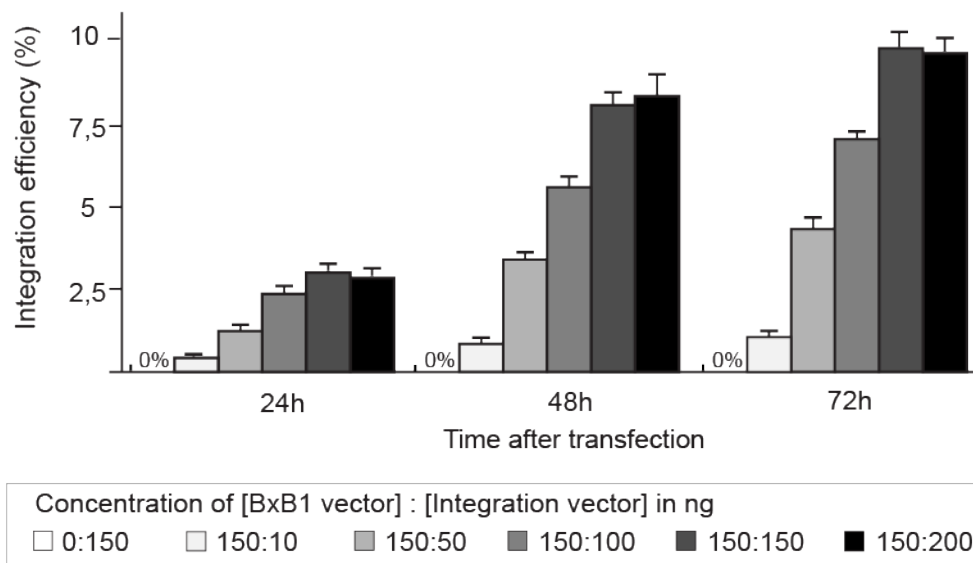

We co-transfected, in different ratios, a 12kb integrative plasmid comprising a promoterless Puromycin-2A-mKate2 construct followed by constitutively expressed Cerulean together with a codon-optimized BxB1 expressing plasmid into the HEK293FT-LP chassis cell line. The transfection mix was supplemented with mock plasmid DNA to always transfect the cells with a total of 400ng of DNA. Integration efficiency was measured as percentage of mKate2 positive cells within the transfected cell population. Error bars represent the standard deviation from 3 independently repeated experiments.

**Supplementary Figure 7. Microscopy images of different model chassis cell lines after integration of a simple circuit.**

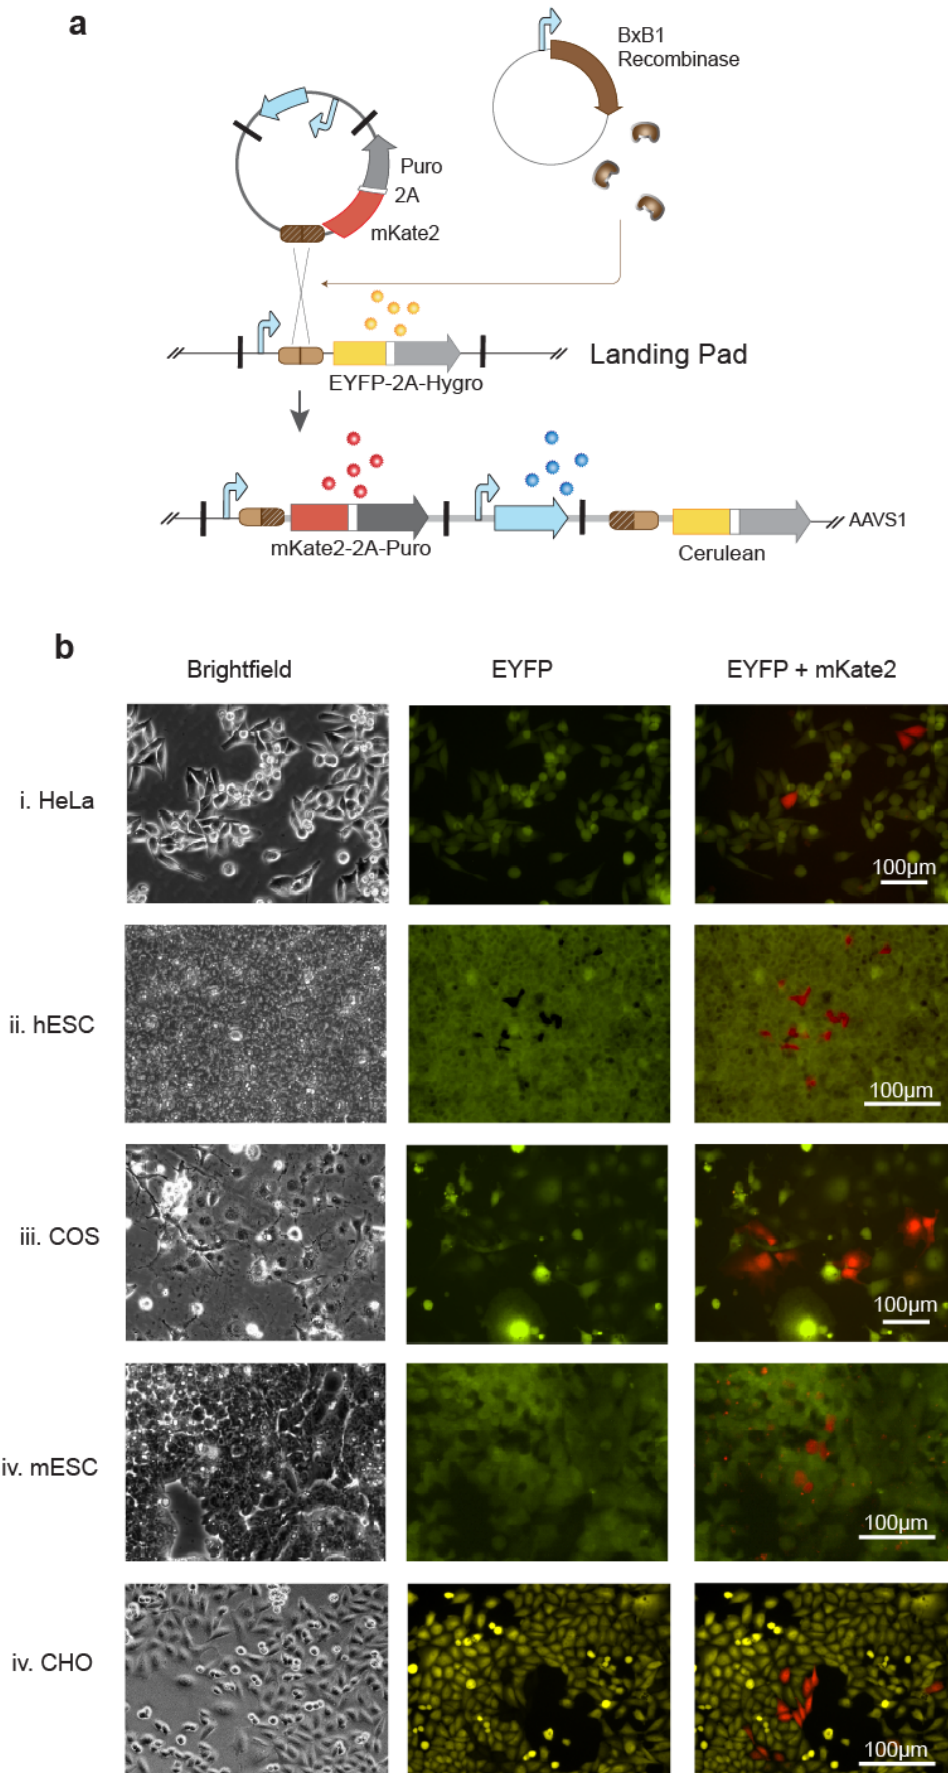

**(A)** The integrative plasmid comprising a promoterless mKate-2A-puro gene cassette and a constitutively expressed Cerulean fluorescent reporter was co-transfected with the BxB1 recombinase expression plasmid in various monoclonal chassis cell lines. Integration events in the landing pad can be monitored in the transfected cells by both expression of mKate2 and reduction in expression of EYFP. **(B)** Fluorescent microscopy images of monoclonal chassis cell lines four days after co-transfection with BxB1 expression plasmid and the integrative plasmid: (i) HeLa cells, (ii) human Embryonic Stem Cells, (iii) COS cells, (iv) mouse Embryonic Stem Cells and (v) CHO cells.

**Supplementary Figure 8. Comparison of circuit integration efficiency in three different chassis cell lines.**

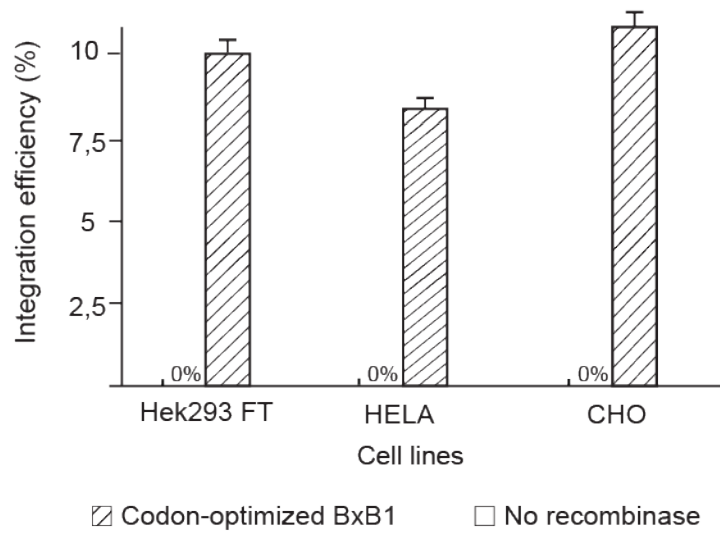

We co-transfected a 12kb integrative plasmid comprising a promoterless Puromycin-2A-mKate2 followed by constitutively expressed Cerulean together with a codon-optimized BxB1 expressing plasmid into our HEK293FT, HeLa and CHO chassis cell-lines. Integration efficiency was measured as percentage of mKate2 positive cells within the transfected cell population 3 days after transfection.

## Supplementary Figure 9. Flow cytometry analysis of chassis cell line fluorescence before and after integration of circuits and selection with puromycin.

FACS comparative analysis of EYFP and mKate2 fluorescence levels in different chassis cell-lines before integration of the integration vector carrying the promoterless mKate2-2A-puro cassette, and 14 days after integration and selection with puromycin. After selection, more than 99% of cells that survive selection are mKate2 positive and EYFP negative, demonstrating the specificity of the integration events into the landing pad.

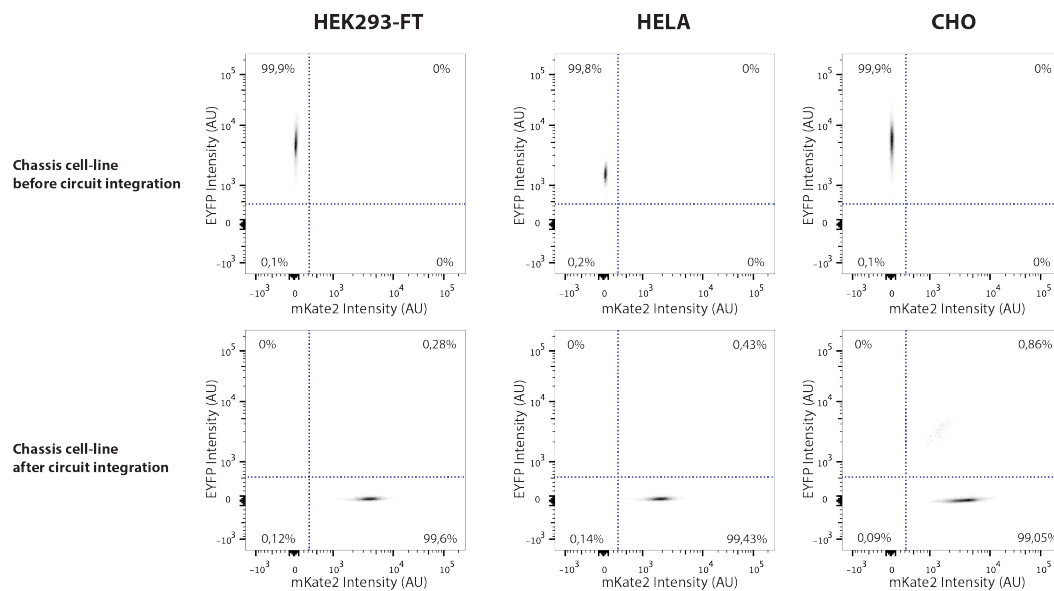

**Supplementary Figure 10. Specificity of integration into the landing pad: Southern Blot genomic analysis assessing the specificity of BxB1 mediated integration.**

**A**

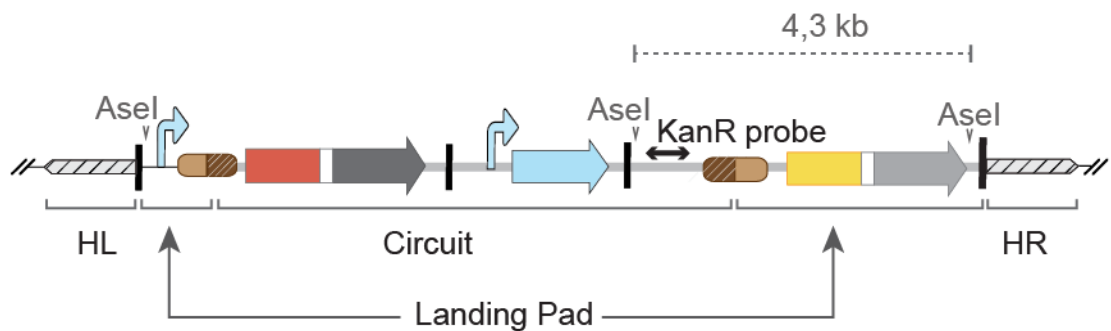

**B**

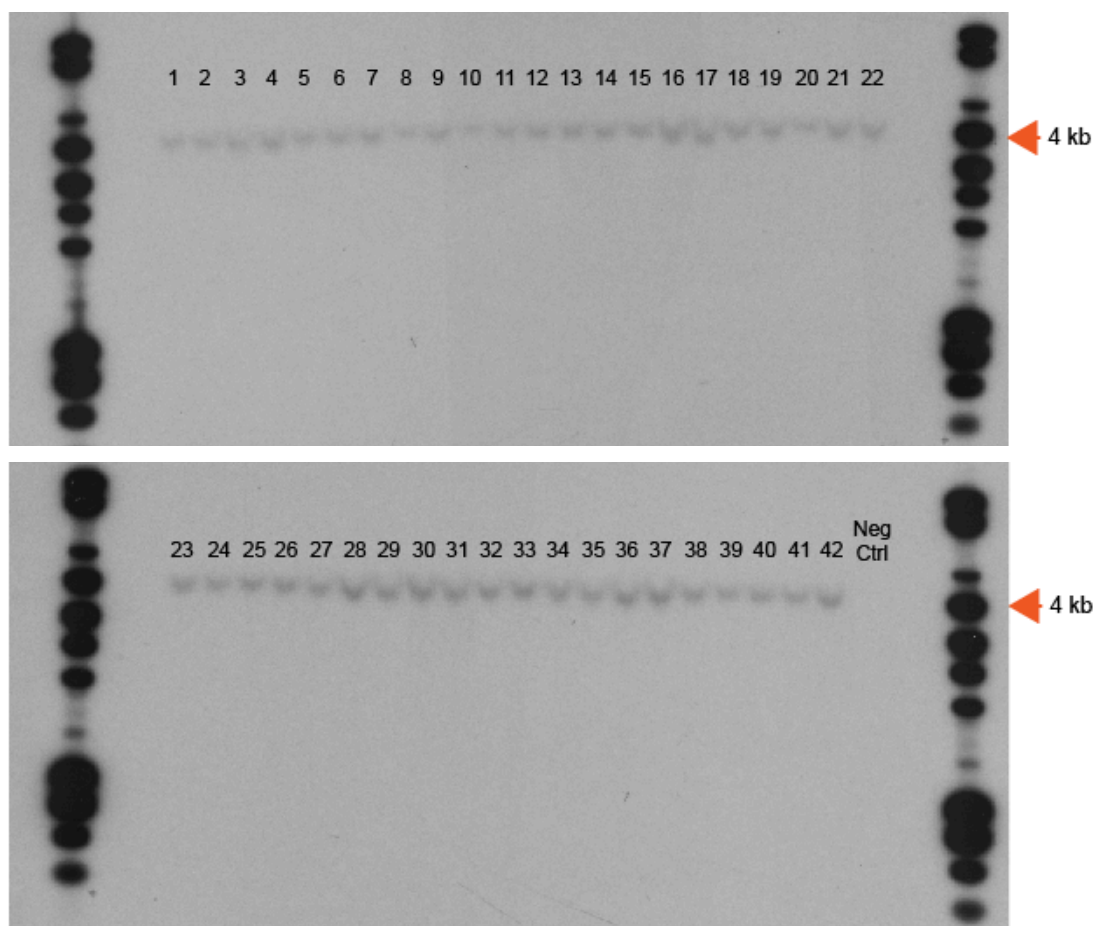

**(A)** Schematic of the Southern probe and the restriction enzyme cut sites. The 300 bp probe used for the Southern Blots corresponds to an internal sequence of the KanR gene from the integrated plasmid. Digestion of the chromosomal DNA with AseI results in a 4.3kb band containing the KanR gene if the circuit has been correctly integrated into the landing pad.

**(B)** Targeted integration of the integrative plasmid in the landing pad was confirmed for 42 randomly sorted clones that were expanded after selection with puromycin. For all the 42 clones, a single band of the expected size is revealed on the SB. Genomic DNA of the HEK293FT#8 monoclonal chassis cell line before payload integration is used as a negative control (last lane on the right).

# Supplementary Figure 11. Sequence alignment of insert flanking sequences of the 42 isolated clones.

## Sequences close to the attL junction

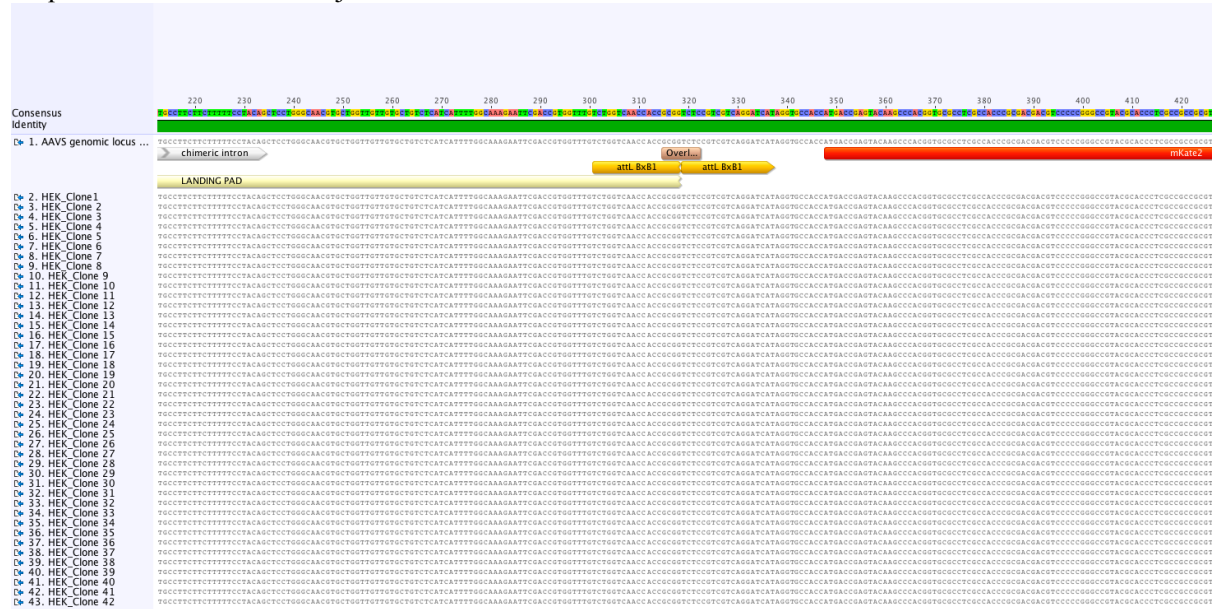

## Sequences close to the attR junction

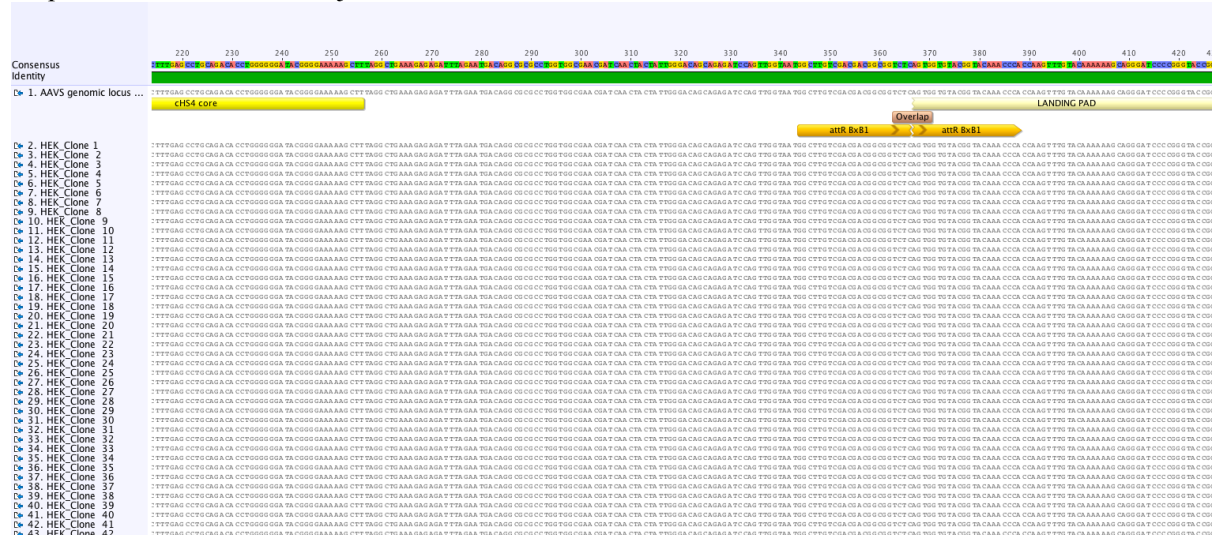

**Supplementary Figure 12. Circuit performance in Hek293FT, HeLa and CHO chassis cell-lines.**

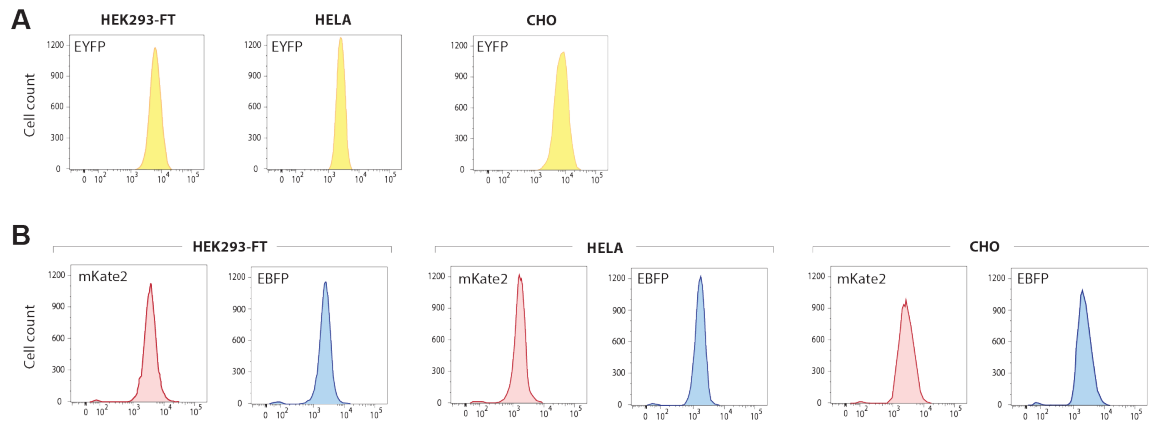

**(A)** Homogeneity of transgene (EYFP) expression in different landing-pad chassis cell lines. **(B)** FACS histograms of cells selected with puromycin after BxB1 mediated integration in different landing-pad cell lines.



**Supplementary Figure 13. Early genomic rearrangement of the 7-gene payload following transfection.**

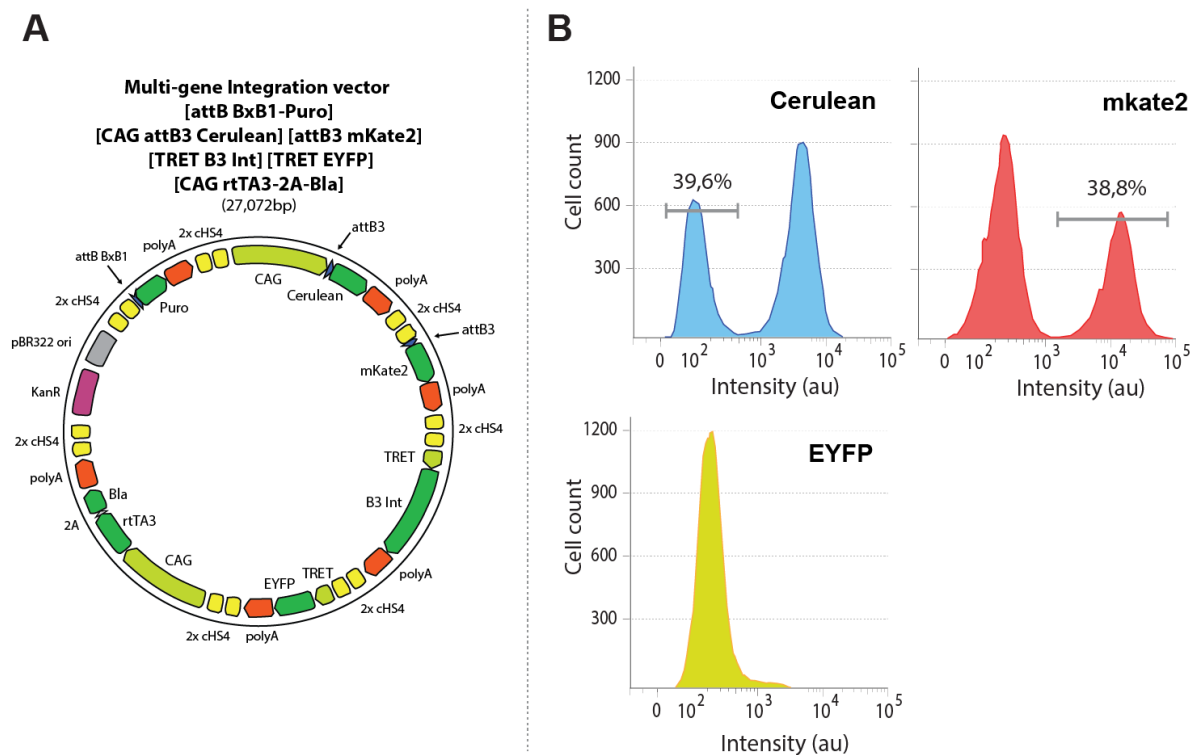

**(A)** Annotated map of the fully assembled circuit. **(B)** Representative FACS analysis histograms of resistant polyclonal population after integration of the 7-gene payload and selection with Puromycin for 7 days. About 40% of the cells have already excised the Cerulean transcription unit and switched to the final mKate2 expressing state. Given that essentially no cells are in the intermediate state, we hypothesized the switch occurred soon after transfection (complete degradation of the cerulean fluorescent protein takes up to a week). Leakiness of the TRE promoter from the transfected plasmids in the presence of high levels of rtTA3 (constitutively expressed) was sufficient to trigger expression of B3 integrase at low levels. Even in absence of dox, this resulted in moderate excision of the Cerulean expression cassette in the pool of plasmids. The experiment in Figure 3 is therefore performed with cells harboring a non-rearranged payload (red negative sorted cells).

**Supplementary Figure 14. Microscopy images of isolated colonies corresponding to the 18 different phenotypes of the circuit library.**

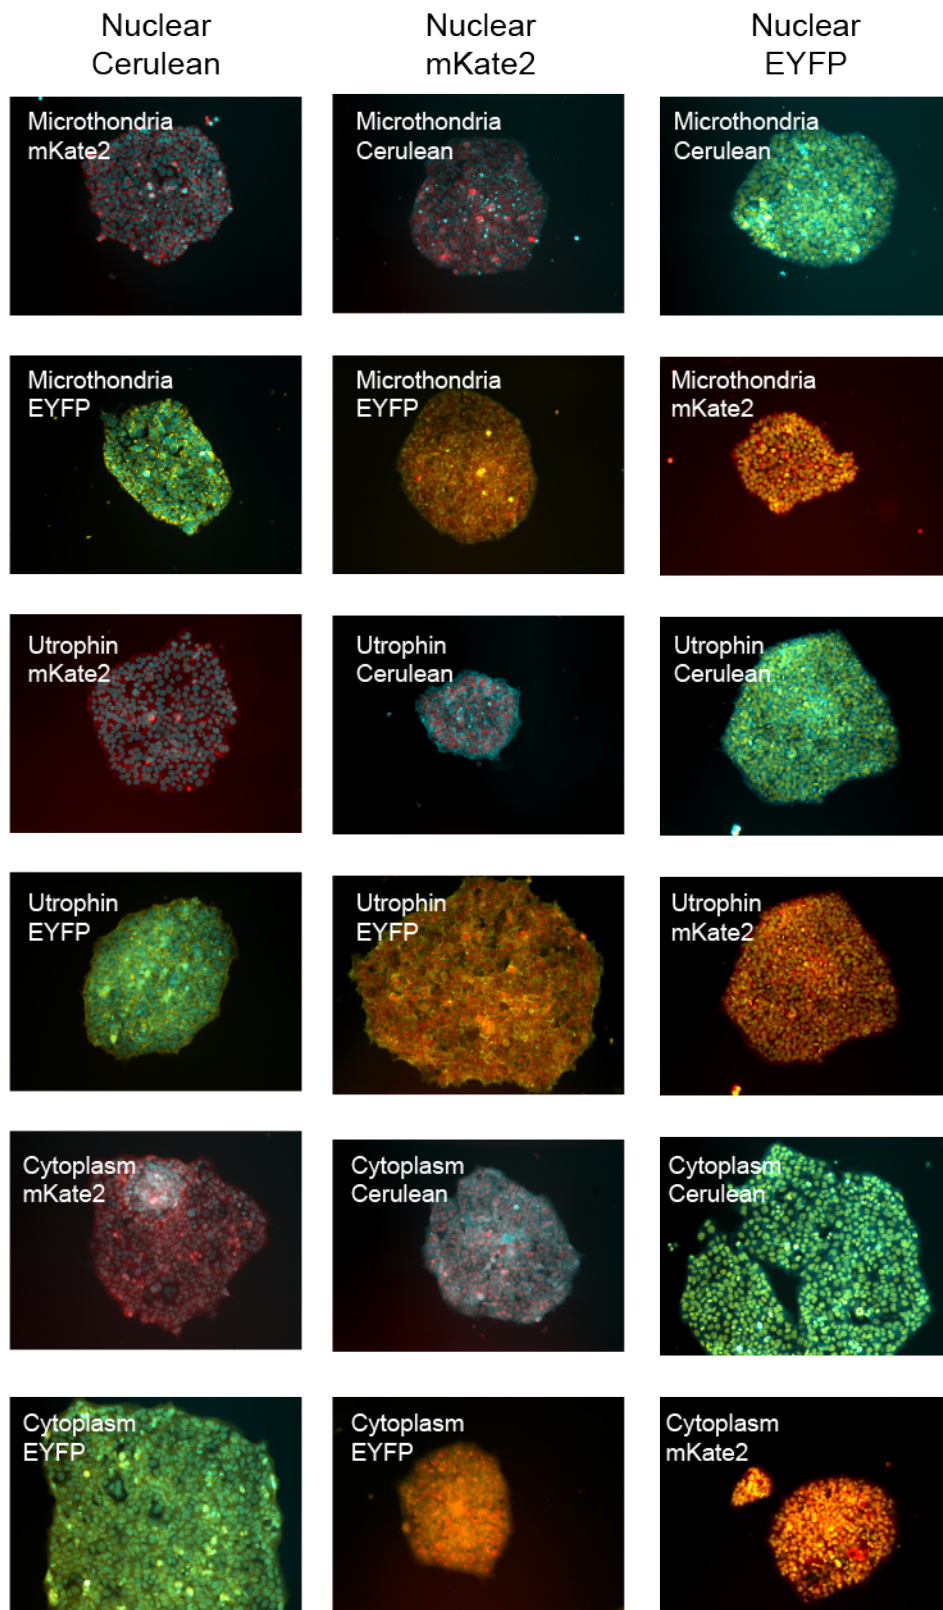

**Supplementary Figure 15. Annotated maps of vectors used in this study.**

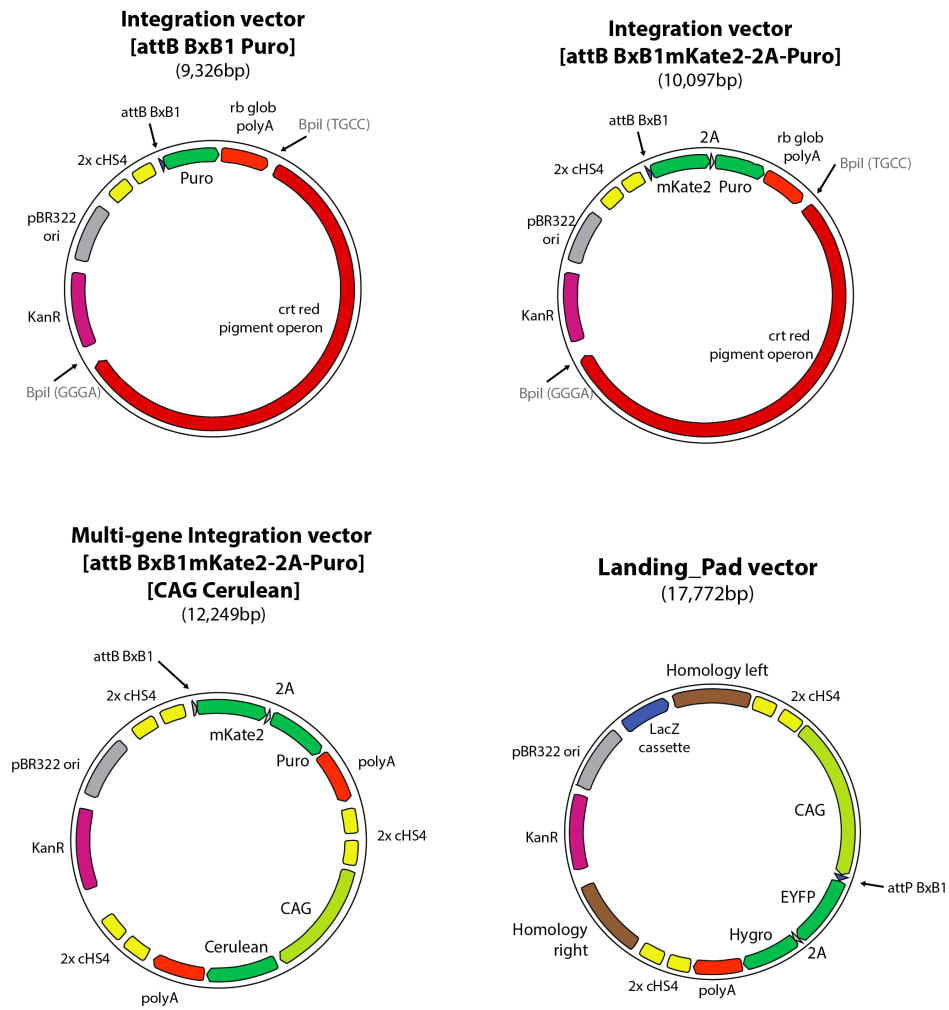

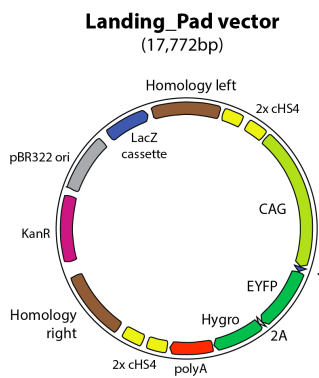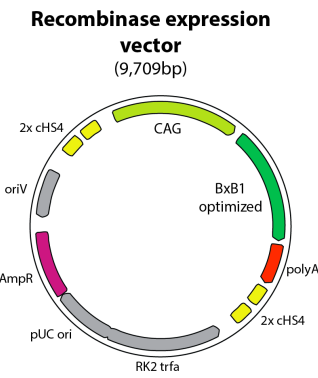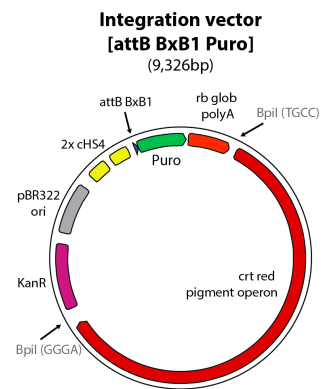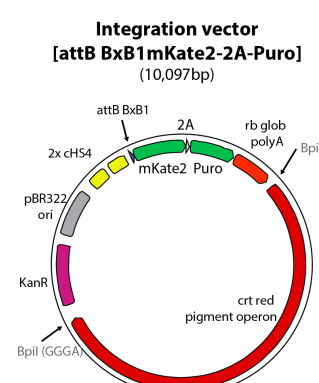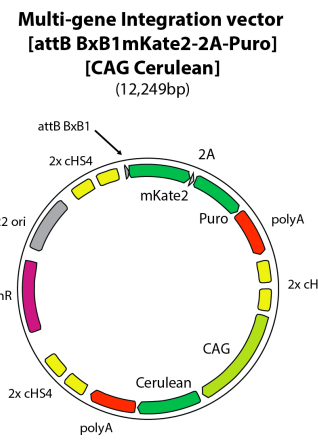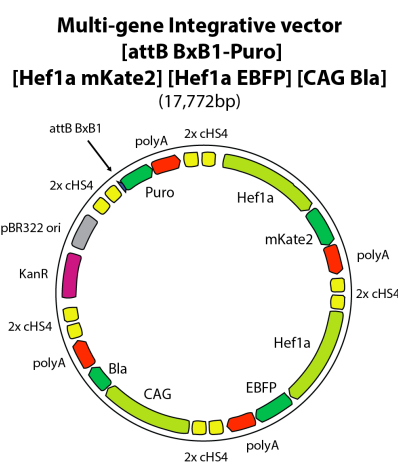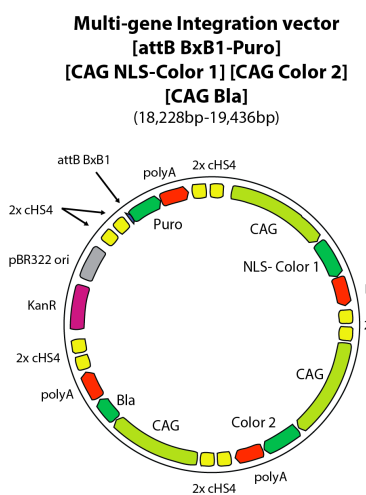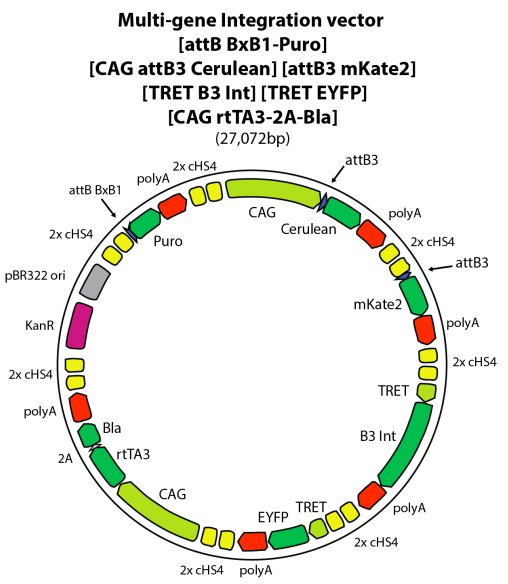

**Supplementary Table 1. Comparison of integration efficiencies of site-specific recombinases.**

| Recombinase | Integration efficiency  | Cell type | Reference  |
|-------------|-------------------------|-----------|------------|
| BxB1        | $\sim 1 \times 10^{-1}$ | HEK293    | This study |
| PhiC31      | $\sim 2 \times 10^{-3}$ | HEK293    | 2          |
| R4          | $\sim 1 \times 10^{-4}$ | HEK293    | 3          |
| Cre         | $\sim 1 \times 10^{-5}$ | HEK293    | 4          |
| Flp         | $\sim 1 \times 10^{-6}$ | HEK293    | 5          |

**Supplementary Text 1. DNA sequences of the probes used for the Southern Blots.**

**YFP (Landing Pad integration test) :**

caaagaattcgaccgtggttctgtctgtcaaccaccgcggtctcagtggtgtacggtacaaaccaccaagttgtacaaaaagcagggatc  
cccgggtaccggtgcaccatggtgagcaagggcgaggagctgttaccggggtggtgccatcctggtcgagctggacggcgacgtaa  
acggccacaagttcagcgtgtccggcgagggcgagggcgatgccacctacggcaagctgaccctgaagttcatctgcaccaccggcaagc  
tgcccgtgccctggcccaccctcgtga

**KanR (circuit integration test):**

gggatcgcagtggtgagtaaccatgcatcagcagtagcagataaaatgcttgatggtcggagaggcataaattccgctcagccagtttagt  
ctgaccatctcatctgtaacatcattggcaacgctaccttggcatgttcagaaacaactctggcgcatcgggctccatacaagcagtagatt  
gtcgcacctgattcccgcattatcgcgagcccattatacccatataaatcagcatcattggaattaatcgcggcctcagcgttcccgtg  
aatatggctcat

**Supplementary Text 2. DNA sequences of the primers used for genomic PCRs.**

**XD 621 Forward AAVS1 Primer:** 5- GGCCCTGGCCATTGTCATT -3  
**XD 622 Forward AAVS1 CEL-I Primer:** 5- TTCGGGTCACCTCTCACTCC -3  
**XD 623 Reverse AAVS1 CEL-I Primer:** 5- GGCTCCATCGTAAGCAAACC -3  
**LW06-LP-RV:** 5-ACTCGAGAAATTTCGGAGCCAAC-3

**Supplementary Text 3. DNA sequences of the genetic components from our mammalian part library used in this study.**

**Pars int p\_Insulator:**

**p\_Insulator [2xcHS4 core fw]**

CCTCGAGACAATTGATTAACATCGATACGGTACCGAGTTGGCGCGCCTGGGAGCTCACGGGGACAGCCCCCCCCAAAGCCC  
CCAGGGATGTAATTACGTCCCTCCCCGCTAGGGGGCAGCAGCGAGCCGCCCGGGGCTCCGCTCCGGTCCGGCGCTCCCCC  
GCATCCCCGAGCCGGCAGCGTGCGGGACAGCCCGGCACGGGGAAGGTGGCACGGGATCGCTTTCCTCTGAACGCTTCTC  
GCTGCTTTTGGAGCCTGCAGACACCTGGGGGATACGGGGAAAAAGCTTTAGGCTGAAAGAGAGATTTAGAATGACAGGCG  
CGCCTGGCCATACATCGATACGGTACCGAGTTGGCGCGCCTGGGAGCTCACGGGGACAGCCCCCCCCAAAGCCCCAGGG  
ATGTAATTACGTCCCTCCCCGCTAGGGGGCAGCAGCGAGCCGCCCGGGGCTCCGCTCCGGTCCGGCGCTCCCCCGCATCC  
CCGAGCCGGCAGCGTGCGGGACAGCCCGGCACGGGGAAGGTGGCACGGGATCGCTTTCCTCTGAACGCTTCTCGCTGCTC  
TTTGGAGCCTGCAGACACCTGGGGGATACGGGGAAAAAGCTTTAGGCTGAAAGAGAGATTTAGAATGACAGGCGCGCCTGG  
TGGGAACGATCAAC

**p\_Insulator [2xcHS4 core rev]**

CCTCGAGACAATTGATTAACATCGATACGGTACCGAGTTGGCGCGCCTGGGAGCTCACGGGGACAGCCCCCCCCAAAGCCC  
CCAGGGATGTAATTACGTCCCTCCCCGCTAGGGGGCAGCAGCGAGCCGCCCGGGGCTCCGCTCCGGTCCGGCGCTCCCCC  
GCATCCCCGAGCCGGCAGCGTGCGGGACAGCCCGGCACGGGGAAGGTGGCACGGGATCGCTTTCCTCTGAACGCTTCTC  
GCTGCTTTTGGAGCCTGCAGACACCTGGGGGATACGGGGAAAAAGCTTTAGGCTGAAAGAGAGATTTAGAATGACAGGCG  
CGCCTGGCCATACATCGATACGGTACCGAGTTGGCGCGCCTGGGAGCTCACGGGGACAGCCCCCCCCAAAGCCCCAGGG

ATGTAATTACGTCCCTCCCCGCTAGGGGGCAGCAGCGAGCCGCCGGGGCTCCGCTCCGGTCCGGCGCTCCCCCGCATCC  
CCGAGCCGGCAGCGTGCAGGACAGCCCGGGCACGGGGAAGGTGGCACGGGATCGCTTTCCTCTGAACGCTTCTCGCTGCTC  
TTTGAGCCTGCAGACACTGGGGGATACGGGGAAAAAGCTTTAGGCTGAAAGAGAGATTTAGAATGACAGGCGCGCTGG  
TGGCAACGATCAAC

**p\_Insulator [inert sequence]**

CCTCGAGACAATTGATTAACATCGATACGGTACCGAGTTGGCGCGCTGGGAGCTCACGGGGACAGCCCCCCCCAAAGCCC  
CCAGGGATGTAATTACGTCCCTCCCCGCTAGGGGGCAGCAGCGAGCCGCCGGGGCTCCGCTCCGGTCCGGCGCTCCCCC  
GCATCCCCGAGCCGGCAGCGTGCAGGACAGCCCGGGCACGGGGAAGGTGGCACGGGATCGCTTTCCTGAACGCTTCTC  
GCTGCTCTTTGAGCCTGCAGACACCTGGGGGATACGGGGAAAAAGCTTTAGGCTGAAAGAGAGATTTAGAATGACAGGCG  
CGCCTGGCCATACATCGATACGGTACCGAGTTGGCGCGCTGGGAGCTCACGGGGACAGCCCCCCCCAAAGCCCCAGGG  
ATGTAATTACGTCCCTCCCCGCTAGGGGGCAGCAGCGAGCCGCCGGGGCTCCGCTCCGGTCCGGCGCTCCCCCGCATCC  
CCGAGCCGGCAGCGTGCAGGACAGCCCGGGCACGGGGAAGGTGGCACGGGATCGCTTTCCTCTGAACGCTTCTCGCTGCTC  
TTTGAGCCTGCAGACACTGGGGGATACGGGGAAAAAGCTTTAGGCTGAAAGAGAGATTTAGAATGACAGGCGCGCTGG  
TGGCAACGATCAAC

**Promoters:**

**Ubc**

TTCCGCTTGTAGCTTAAAGTATCTGGCCTCCGCGCCGGGTTTTGGCGCTCCCGGGCGCCCCCTCCTACGGCGAGCG  
TCCACGTCAGACGAAGGGCGCAGCGAGCGTCTGATCCTTCCGCCCGGACGCTCAGGACAGCGCCCGCTGCTCATAAGA  
CTCGGCTTAGAACCCAGTATCAGCAGAAGGACATTTTAGGACGGGACTTGGGTGACTCTAGGGCACTGGTTTTCTTTCCA  
GAGAGCGGAACAGGCGAGGAAAAGTAGTCCCTTCTCGGCGATTCTGCGGAGGGATCTCCGTGGGGCGGTGAACGCCGATGA  
TTATAAAGGACCGCCGGGTGTGGCACAGCTAGTTCCTGCGAGCCGGGATTTGGGTGCGGGTCTTGTGTGGATCGCTG  
TGATCGTCACTGGTGTAGTACGGGCTGTGGGCTGGCCGGGCTTTCGTGGCCGGGGCGCTCGTGGGACGGAAGCGT  
GTGGAGAGACCCGAAGGGCTGTAGTCTGGGTCGGCGCAGCAAGGTGGCCCTGAACTGGGGGTTGGGGGAGCGCAAAA  
TGGCGGCTTCCCGAGTCTGAATGGAAGACGCTTGTGAGGCGGGCTGTGAGGTCGTTGAAACAAGGTGGGGGCGATGGT  
GGGCGGCAAGAACCAGGTCTTGAAGCCTTCGCTAATGCGGGAAGCTCTTATTCCGGTGAGATGGGCTGGGGCACCATCT  
GGGACCCTGACGTGAAGTTTGTACTGACTGGAGAAGCTCGGTTTTGTCGCTGTTGCGGGGGCGGCAGTTATGGCGGTGCCG  
TTGGCAGTGACCCGTACCTTTGGGAGCGCGCCCTCGTCTGTGCTGACGTCACCCGTTCTGTTGGCTTATAATGCAGGG  
TGGGGCCACCTGCCGCTAGGTGTGCGGTAGGCTTTTCTCCGTCGAGGACGCAGGGTTCGGGCTAGGGTAGGCTCTCCTGA  
ATCGACAGGCGCGGACCTCTGGTGAAGGGGAGGGATAAGTGAAGCGTCAGTTTCTTTGGTGGTTTTATGTACCTATCTTCT  
AAGTAGCTGAAGTCCGGTTTTGAACTATGCGCTCGGGGTTGGCGAGTGTGTTTTGTGAAGTTTTTAGGCACCTTTTGAAT  
GTAATCATTTGGGTCAATATGTAATTTTACAGTGTAGACTAGTAAATTTGCCGTAATTTCTGGCCGTTTTTGGCTTTTTTGT  
AGACGAAGCTTGGC

**Hef1a**

TTAATTGGCTCCGGTGCCCGTCAAGTGGGCGAGGCGCACATCGCCACAGTCCCGAGAAGTTGTGGGGAGGGGTTCGGCAATT  
GAACCGGTCCCTAGAGAAGGTGGCGGGGTAAGTGAAGTGTGCTGACTGGCTCCGCTTTTCCCGAGGGGTGG  
GGGAGAACCCTATATAAGTGCAGTAGTCCCGTGAACGTTCTTTTCGCAACGGGTTTCCCGCCAGAACACAGGTAAGTGCC  
GTGTGTGGTTCGCGGGGCTGGCCTCTTACGGGTTATGGCCCTTGCCTGCTTGAATTAATCCACTGGCTGCAGTACGT  
GATTCCTGATCCCGAGCTTCGGGTTGGAAGTGGGTGGGAGAGTTCGAGGCCTTGCCTTAAGGAGCCCTTCGCCTCGTCT  
GAGTTGAGGCTGGCCTGGGCGCTGGGGCCGCGCGTGCGAATCTGGTGGCACCTTCGCGCTGTCTCGCTGTTTTCGATAA  
GTCTTAGCCATTTAAATTTTTGATGACTGCTGCGACGCTTTTTTCTGGCAAGATAGTCTGTAAATGCGGGCCAAAGATC  
TGCACACTGGTATTTCCGTTTTTGGGGCCGCGGGCGGCGACGGGGCCGTCGCTCCAGCGCACATGTTCCGCGAGGGGGG  
CCTGCGAGCGCGCCACCGAGAATCGGACGGGGGTAGTCTAAGTGGCCGGCTGCTCTGGTGCCTGGCCTCGCGCCCGG  
TGTATCGCCCGCCCTGGGCGGCAAGGCTGGCCGGTTCGGCACAGTTCGCTGAGCGGAAAGATGGCCGCTTCCCGGCCCTG  
CTGACGGGAGTCAAAAATGGAGGACGCGGCGCTCGGGAGAGCGGGCGGGTGTAGTACCCACAAAAGGAAAAGGCCCTT  
CCGTCCTCAGCCGTCGCTTCATGTACTCCACGGAGTACGGGCGCCGTCACGGCACCTCGATTATCTCGAGCTTTTGGAG  
TACGTCGCTTTAGGTTGGGGGAGGGGTTTTATGCGATGGAGTTTCCCACACTGAGTGGGTGGAGACTGAAGTTAGGCCA  
GCTTGGCACTTGATGTAATCTCCTTGGAAATTTGCCTTTTTGGAGTTGGATCTTGGTTCATCTCAAGCCTCAGACAGTGGT  
CAAAGTTTTTTCTTCCATTTACAGTGGATCCCAAGG

**CAG**

GTCGACCTCGAGTAAATTAATGTGCTGCAAGGCGATTAAGTTGGGTAACGCCAGGGTTTTCCAGTACGACGTTGTA  
CGACGGCCAGTGAATTGTAATACGACTACTATAGGGCGAATTGGAGCTAGGCCTACGTAGCGCGGAGCTCCACCGGGT  
GACTAGTTAATAAGTAATCAATTACGGGGTCAATTAGTTCATAGCCCATATATGGAGTTCGCGGTACATAACTTACGGTAA  
ATGGCCCGCTGGCTGACCGCCAACGACCCCCGCCATTGACGTCATAATGACGTATGTTCCCATAGTAACGCCAATAGG  
GACTTTCCATTGACGTCATGAGGTTGAGTATTTACGGTAAACTGCCACTTGGCAGTACATCAAGTATCATATGCGTAAGTA  
CGCCCCCTATTGACGTCATGACGGTAAATGGCCCGCTGGCATTATGCCAGTACATGACCTTATGGGACTTTCCTACTTGG  
CAGTACATCTAGTATTAGTTCATCGCTATTACCATGGTCGAGGTGAGCCCCAGTTCTGCTTACTCTCCCCATCTCCCCCCC  
TCCCCACCCCAATTTGTATTTATTTATTTTAAATTTTGTGACGCGATGGGGCGGGGGGGGGGGGGGGCGCGCCAG  
CGCGGGCGGGGGCGGGCGAGGGGCGGGCGGGCGGGCGAGGCGAGAGGTGCGGGCGGAGCCAAATCAGAGCGGGCGCTCCGA  
AAGTTTTCTTTTATGGCGAGGCGGGCGGGCGGGCCCTATAAAAAGCGAAGCGCGGGCGGGCGGGAGTTCGAGTTCGCTG  
CGTTGCCTTCGCCCCGTGCCCGCTCCGCGCCGCTCGGCGCCCGCCCGCCCGGCTCTGACTGACCGGTTACTCCACAGGTG  
AGCGGGCGGGACGGCCCTTCTCCTCCGGGCTGTAATTAGCGCTTGGTTAATGACGGCTCGTTTTCTTTCTGTGGCTGCGTGA  
AAGCCTTAAAGGCTCCGGGAGGGCCCTTTGTGCGGGGGGAGCGGCTCGGGGGTGGCTGCGTGTGTGTGCTGCGTGGGA  
GCGCGCGTGCAGCGCCGCGCTGCCCGGGCTGTGAGCGCTGCGGGCGGGCGGGGCTTTGTGCGCTCCGCGTGTGCGCG  
AGGGGAGCGCGGCGGGGGCGGTGCCCGCGGTGCGGGGGGGCTGCGAGGGGAACAAAGGCTGCGTGCAGGGGTGTGTGCG  
TGGGGGGTGTGAGAGGGGGTGTGGGCGGGCGGGTGGGCTGTAAACCCCCCTGCACCCCCCTCCCCGAGTTGTGAGCACG  
GCCCCCTCGGGTCCGGGCTCCGTGCGGGGCTGGCGGGGAGGGGCTCGCCGTGCCGGGCGGGGGTGGCGGCAAGTGGGG  
TGCCGGGCGGGGCGGGGCCCTCGGGCGGGGAGGGCTCGGGGAGGGGCGGGCGGGCGGGCCCGGAGCGCGGGCGGGTGT  
GAGGCGCGGCGAGCCGAGCCATTGCTTTTATGTAATCGTGCAGAGGGGCGAGGGACTTCTTTGTCCAAATCTGGCG  
GAGCCGAAATCTGGAGGCGCCCGCCGACCCCTTACGCGGGCGGGGCGAAGCGGTGCGGGCGCCGGCAGGAAGGAAATG  
GGCGGGAGGGCTTCTGCTGCTGCCGCGCCGCTCCCTTCTCCATCTCCAGCCTCGGGGCTGCCGAGGGGGACGGCTG

CCTTCGGGGGGGACGGGGCAGGGCGGGGTTCCGGCTTCTGGCGTGTGACCGGGCGCTCTAGAGCTCTGCTAACCATGTTTCAT  
GCCTTCTTTCTTCTACAGCTCTGGGCAACGTGCTGGTGTGTGTGCTGTCTCATCATTTTGGCAAAGAATTCTGTAC

**TRE-tight:**

ACTAATTCGCCCTTCAGTTCGCTAGACGAGTTACTCCCTATCAGTGATAGAGAACGATGTCGAGTTACTCCCTATCAGTG  
ATAGAGAACGTATGTCGAGTTACTCCCTATCAGTGATAGAGAACGTATGTCGAGTTACTCCCTATCAGTGATAGAGAACG  
TATGTCGAGTTATCCCTATCAGTGATAGAGAACGTATGTCGAGTTACTCCCTATCAGTGATAGAGAACGTATGTCGAGGTA  
GGCGTGTACGGTGGGAGGCCTATAAAGCAGAGCTCGTTTGTGAACCGTCAGATCGCAAAGGGCGAATTCGACCCAAGTTT  
GTACAATCACTCTTCTGGTGAC

**Inert 3' UTR**

CCACTGGATTGTACAATTAC

**Genes (with Kozak sequence):**

**BxB1 wild-type recombinase**

GCCGCCACCATGAGAGCCCTGGTAGTCATCCGCCTGTCCCGCTACCGATGCTACGACTTACCGGAGCGTACGCTGGAGT  
CTTGCCAGCAGCTCTCGCCCAGCGCGGTGGGACGTCGTCGGGGTACGGGAGGATCTGGACGCTCTCCGGGGCGGTGATCC  
GTTCCGACCGGAAGCGCAGACCGAACCTGGCCCGGTGGCTAGCGTTTCGAGGAGCAACCGTTCCGACGTGATCGTGGCGTACCG  
GGTAGACCGGTTGACCCGATCGATCCGGCATCTGCAGCAGCTGGTCCACTGGGCCGAGGACCACAAGAAGCTGGTCGTCTCC  
GCGACCGAAGCGCACTTCGATACGACGACCGCTTTGCGGCGGTGCTCATCGCGCTTATGGGAACGGTGGCGCAGATGGAAT  
TAGAAGCGATCAAAGAGCGGAACCGTTCCGGCTGCGCATTTCAATAATCCGCGCCGGGAAATACCGAGGATCCCTGCCCGGTG  
GGGATACCTGCTACCGCGCTGGACGGGAGTGGCGGTGGTCCCGGACCTGTGCAGCGAGAGCGCATCCTCGAGGTGTA  
TCACCGCGTCGTCGACAACCACGAGCCGCTGCACCTGGTGGCCACGACCTGAACCGCGCTGGTGTCTGTCCGGAAGGAC  
TACTTCGCGCAGCTGCAAGGCCGCGAGCCGAGGGCCGGAGTGGTCCGGTACCGCGCTGAAGCGATCGATGATCTCCGAG  
GCGATGCTCGGGTACGCGACTTGAACGGTAAGACCGTCCGAGACGACGACGGAGCCCGCTGGTGGCGGCTGAGCCGATC  
CTGACCGTGTGACGACTGGAGGCGCTGCGCGCTGAGCTCGTCAAGACCTCCCGGGCGAAGCCCGGCTGTCTACCCCGTCGC  
TGCTGTGCGGGTGTGTCTGCGCGGTGTGCGGGGAGCCCGCTACAAGTTCGCGGGGGAGGACGTAAGCACCCGCGCTA  
CCGCTGCCGCTCGATGGGGTCCCGAAGCACTGCGGGAACGGCACGGTGGCGATGGCCGAGTGGGACGCGTTCTGCGAGGA  
GCAGGTGCTGGATCTGCTCGGGGACGCGGAGCGTCTGGAGAAAAGTCTGGGTAGCCGGCTCGGACTCCGCGGTGCAACTCGC  
GGAGGTGAACGCGGAGCTGGTGGACCTGACGTCGCTGATCGGCTCCCGGCTACCGGGCCGGCTCTCCGACGCGAGAAGC  
ACTGGATGCCCGTATTGCGCCGCTGGCCGCGCGGCAAGAGGAGCTGGAGGGTCTAGAGGCTCGCCCGCTGGCTGGGAGTG  
GCGCGAGACTGGGACGCGGTTCCGGGACTGGTGGCGGGAGCAGGACACCGCGGCAAGAACACCTGGCTTCGGTTCGATGAA  
CGTTCGGCTGACGTTTCGACGCTCCGCGCGGGGCTGACTCGCACGATCGACTTCGGGGATCTGCAGGAGTACGAGCAGCATCTC  
AGGCTCGGCAGCGTGGTCAACGGCTACACACCGGGATGTCTGTA

**BxB1 mammalian codon optimized recombinase**

GCCGCCACCATGAGAGCACTGGTGGTCACTCCGACTGAGTAGGGTACACAGACGCAACAACAAGCCCGAGAGGCAGCTGGAA  
TCATGTCAGCAGCTGTGCGCACAGCGAGGATGGGACGTTGGTCCGAGTGGCAGAGGATCTGGACGTGAGCGGCGCTGTGAT  
CCATTGACAGAAAGCGGAGGCCAACCTGGCAAGGTGGTGGCTTTCGAGGAACAGCCCTTGTATGTGATCGTCGCTACA  
GAGTGGACAGGCTGACACGCTTATTCGACATCTGCAGCAGCTGGTGCATTGGGCCGAGGACCACAAGAACTGGTGGTCA  
GTGCAACTGAAGCCACTTCGATACCACAACCTTTTGGCCGCTGTGGTCACTCGCACTGATGGGACCGCTGGCCAGATGGA  
GCTGGAAGCTATCAAGGAGCGAAACCGGAGTGCAGCCCATTTCAATATTCGGGCCGGGAAATACAGAGGATCACTGCCCC  
TTGGGGCTATCTGCCTACCCGGGTGGATGGGGAGTGGAGACTGGTCCAGACCCCGTCCAGAGAGAGAGGATTCTGGAAGT  
GTACCACAGGGTGGTGCATAACCACGAACCACTGCATCTGGTCCGCCACGACCTGAATAGGCGCGGCTGTGAGCCAAA  
AGATTATTTGCTCAGCTGCAGGGAAGGGAGCCACAGGGACGAGAATGGTCCGCTACCGCCCTGAAGCGGAGCATGATCAG  
TGAGGCTATGCTGGGCTACGCAACTCTGAATGGGAAAACCGTCCGGGACGATGACGAGGACCACTGGTGGAGGCTGAGCC  
TATTCTGACACGCGAGCAGCTGGAAGCTCTGCGGGCAGAAGTGGTAAAACCTCCAGAGCCAAACCTGCCGTGAGCAGCC  
AAGCCTGCTGTGAGGGTGTGTTCTGCGCCGCTGTGGGGAGCCAGCATAACAAGTTTCCGGCCGGGGGAAGAAAACATCCC  
CGCTATCGATGCCGGTCTATGGGATCCCTAAGCACTGTGAAACGGCACTGTGGCTATGGCCGAGTGGGACGCTTTTGTG  
AGGAACAGGTGCTGGATCTGCTGGGAGACGCCGAGAGGCTGGAAAAAGTGTGGGTGCTGGCAGCGACTCCGCTGTGGAGC  
TGGCAGAAGTCAATGCCGAGCTGGTGGATCTGACTCCCTGATCGGATCTCCTGCATATAGGGCAGGCTACACAGCGAGA  
AGCTCTGGACGCACGAATTGCTGCACTGGCAGCTGACAGGAGGAACTGGAGGGCTGGAAGCAGCAGCTAGCGGATGGGA  
GTGGCGAGAAACAGGCCAGCGGTTTGGGGATTGGTGGAGAGCAGGACACAGCAGCAAGAACAACCTGGCTGAGAAAGTA  
TGAATGTCAGGCTGACTTCGATGTGCGCGGGGCTGACTCGCACGATCGACTTCGGGGATCTGCAGGAGTATGAACAGCA  
CCTGAGACTGGGGAGCGTGGTCAAGACTGCACACTGGGATGTCTAGTAA

**BxB1 mammalian codon optimized recombinase with N-terminal NLS**

GCCGCCACCATGCCAAAGAAGAAACGCAAAGTTAGAGCACTGGTGGTCACTCCGACTGAGTAGGGTACACAGACGCAACAACA  
AGCCCCAGAGGCAGCTGGAATCATGTCAGCAGCTGTGCGCACAGCGAGGATGGGACGTTGGTCCGAGTGGCAGAGGATCTG  
GACGTGAGCGGCGCTGTGATCCATTGACAGAAAGCGGAGGCCAACCTGGCAAGGTGGCTGGCTTTCGAGGAACAGCC  
TTTGTATGTGATCGTCGCTACAGAGTGGACAGGCTGACACGCTTATTCGACATCTGCAGCAGCTGGTGCATTGGGCCGAGG  
ACCACAAGAACTGGTGGTCACTGCAACTGAAGCCCACTTCGATACCACAACCTTTTGGCCGCTGTGGTCACTCGCACTGAT  
GGGACCGTGGCCAGATGGAGCTGGAAGCTATCAAGGAGCGAAACCGGAGTGCAGCCATTTCAATATTCGGGCCGGGAA  
ATACAGAGGATCACTGCCCCCTTGGGGCTATCTGCTACACCGGAGCAGCTGGAAGCTCTGCGGGCAGAACTGGTGAAGAACTCCAGAGCC  
AGAGAGAGGATTCTGGAAGTGTACCACAGGGTGGTGCATAACCACGAACCACTGCATCTGGTCCGCCACGACCTGAATAGG  
CGCGGCGTGTGAGCCAAAAGATTATTTGCTCAGCTGCAGGGAAGGGAGCCACAGGGACGAGAATGGTCCGCTACCGCC  
CTGAAGCGGAGCATGATCAGTGGGCTATGCTGGGCTACGCAACTCTGAATGGGAAAACCGTCCGGGACGATGACGGAGCA  
CCACTGGTGAAGGCTGAGCCCTATTCTGACACCGGAGCAGCTGGAAGCTCTGCGGGCAGAACTGGTGAAGAACTCCAGAGCC  
AAACCTGCCGTGAGCACCCCAAGCCTGCTGCTGAGGGTGTGTTCTGCGCCGCTGTGGGGAGCCAGCATAACAAGTTTGGCCG  
GCGGGGGAAGAAAACATCCCCGCTATCGATGCCGGTCTATGGGATCCCTAAGCACTGTGGAACCGGCACTGTGGCTATGGC  
CGAGTGGGACGCTTTTGTGAGGAACAGGTGCTGGATCTGCTGGGAGCAGCCGAGAGGCTGGAAGAAAGTGTGGGTGCTGG  
CAGCAGCTCCGCTGTGGAGCTGCAGAAAGTCAATGCGAGCTGGTGGATCTGACTCCCTGATCGAATCTGATCATAGG  
GCAGGCTCACACAGCGAGAAGCTCTGGACGCACGAATTGCTGCACTGGCAGCTCGACAGGAGGAACTGGAGGGGCTGGAA  
GCACGACCTAGCGGATGGGAGTGGCGAGAAACAGGCCAGCGGTTTGGGGATTGGTGGAGAGAGCAGGACACAGCAGCCAA

GAACACTTGGCTGAGAAGTATGAATGTCAGGCTGACTTTCGATGTGCGCGGGGGCTGACCCGAACAATCGATTTTGGCGAC  
CTGCAGGAGTATGAACAGCACCTGAGACTGGGGAGCGTGGTCGAAAAGACTGCACACTGGGATGTCATAG

### **BxB1 mammalian codon optimized recombinase with C-terminal NLS**

GCCGCCACCATGAGAGCACTGGTGGTTCATCCGACTGAGTAGGGTACACAGCACAACAAGCCCGAGAGGCAGCTGGAA  
TCATGTCAGCAGCTGTGCGCACAGCGAGGATGGGACGTGGTTCGGAGTGGCAGAGGATCTGGACGTGAGCGGCGCTGTCGAT  
CCATTTCGACAGAAAGCGGAGGCCAACCTGGCAAGGTGGCTGGCTTTCGAGGAACAGCCCTTGTATGTGATCGTCGCCTACA  
GAGTGGACAGGCTGACACGCTCTATTTCGACATCTGCAGCAGCTGGTGCATTGGGCGGAGGACCACAAGAACTGGTGGTCA  
GTGCAACTGAAGCCCACTTCGATACCACAACCTCTTTTGGCGCTGTGGTTCATCGCACTGATGGGACCCGTGGCCAGATGGA  
GCTGGAAGCTATCAAGGAGCGAAAACCGGAGTGCAGCCCATTTCAATATTCGGGCCGGGAAATACAGAGGATCACTGCCCC  
TTGGGGCTATCTGCCTACCCGGGTGGATGGGAGTGGAGACTGGTGCAGACCCCGTCCAGAGAGAGAGGATTCTGGAAGT  
GTACCACAGGGTGGTTCGATAACCACGAACCACTGCATCTGGTTCGCCACGACCTGAATAGGCGCGGCGTGTGAGCCAAA  
AGATTATTTGCTCAGCTGCAGGGAAGGGAGCCACAGGACGAGAATGGTCCGCTACCGCCCTGAAGCGGAGCATGATCAG  
TGAGGCTATGCTGGCTACGCAACTCTGAATGGGAAAACCTCCGGGACGATGACGGAGCACCCTGGTGGAGGCTGAGCC  
TATTCTGACACGCGAGCAGCTGGAAGCTCTGCGGGCAGAACTGGTGAACCTCCAGAGCCAAACCTGCCGTGAGCACCCC  
AAGCCTGTGCTGAGGGTGTGTTCTGCGCGTCTGTGGGGAGCCAGCATAACAAGTTGCGGGCGGGGAAAGAAAACATCCC  
CGTATCGATGCCGGTCTATGGGATCCCTAAGCACTGTGAAACGGCACTGTGGCTATGGCCGAGTGGGACGCCTTTTGTG  
AGGAACAGGTGCTGGATCTGCTGGGAGACGCCGAGAGGCTGGAAAAAGTGTGGGTGCTGGCAGCAGCTCCGCTGTGGAGC  
TGGCAGAAGTCAATGCCGAGCTGGTGGATCTGACCTCCCTGATCGGATCTCCTGCATATAGGGCAGGCTCACCACAGCGAGA  
AGCTCTGGACGCACGAATTGCTGCACTGGCAGCTGCACAGGAGGAAGTGGAGGGCTGGAAGCAGCAGCTAGCGGATGGGA  
GTGGCGAGAAACAGCCAGCGGTTTGGGGATTGGTGGAGAGAGCAGGACACAGCAGCCAAGAACAACCTGGCTGAGAAGTA  
TGAAGTACAGTGTGCGCGGGGGTACCCGCAACATCGATTTTGGCGACCTGATGAACAGCA  
CCTGAGACTGGGGAGCGTGGTTCGAAAAGACTGCACACTGGGATGTCACCAAAAAAAAAACGCAAAAGTTTAG

### **B3 Recombinase**

GCCGCCACCATGAGCTCGTATATGGATCTTGTGATGATGAACCAGCGACTTTGTACCATAAGTTCGTGGAGTGTGAAAG  
CGGGCGAGAAGTCTGCGGAGACAAGCTGAGTGAATATTACCATGGCGATCCTTAAGGCAATCAAGGGCGTGACCGAAG  
TTAAAAAGACAACCTTTAACAATAAAGACAACAATCAAGCAGGGCCTCCAGTATGACGTGGGTTTCGTGCACTATCTCGTT  
TGTGTATCACTTGAAGGACTGTGATGAGCTGTCCAGGGGCTTGAGCGATGCCTTCGAGCCCTACAAATTCAAAATTAAGTCG  
AATAAAGAGGCAACCTCGTTTAAAGACTCTCTTCGTGGCCCTCGTTTGGCAGCCAGAAGAACTGGCCGGAAGAAAGAGGTGG  
ACCGGAGGTGGATAACTTGTTCATAGCACCGAGACAGCAATCGATTTTCAAATTCATCTTGAACACAGCTGGATAGTAT  
TGAGACACAAAGCAACAGGATCGCCAAAAGCAGGCTGACTTTCATCTTGTGATGACATTTTCAACTGTGATAGCAAT  
AATGACCTGATGAACGTTGATCCCTCCACATTTAAGATTGTGAAAAACAATTCGTCGGATACCTGCTGAGGCTGAGGTCA  
AACAGACTAAGACACGCAAGTCGAGGAACATTTCTTCTTCCATCCGCGAGAATCGATTCGATCTGTTCCTGGCCTTGACG  
ATTTCTCCGCACATGCCAGCCTACCCAAAAGTCGCGTCTTTCGGATCAAGTATCGGAGCAGAAAGTGGCAGCTTTCCGAGAT  
TCCATGGTCAATTGATACAACCGTTTCTTTAGGAAGTTCCAGCTTCGCTATTTTCGAATAAAGCACGGCCCAAGTCCCA  
TCTGGGCGGATCTGATGAACAGTCTTCTGCACAAGAATCAACTGGGATTCCTGGGCAACTCCCTGGGCACTCCGAGCTCC  
TCCCAGAATCAACGCGAGTCCGGTGCAGGACTGGGCTACACCCACGGTGGTGCAGATTTGCCACAGCCACTGTTCCGATTCC  
TGGTGGCTACTGCGTTCGAAATGAAGAGGGCCACATCGTGGGCTGGGCTGAGAGGACATTAATGATCTGTTTGACGG  
TATTATGGACCCACTTAATGAGAAGGAGGATACAGAGATTTGTGAAAGTACGGCGAGTGGCCAAAATTTGTGAGCAAGGA  
TGTTCGATATTCTGAAGCAGATATCATTGAAGAAGCAGTATGCCGGCAGTATCAGAACCTCACATTTGACGACGATGCTCC  
TTAAGACAGAGTCCGTCACCTTGAGCGGCTCCAAGGGAAGCGAAGAGCCGAGCAGTCCCGTCAAGGATTCCAATACTTAGTAT  
GGGAAAAGCCTCCCAAGCGAGGGCCGAAAAGTTGCGTGCAGCGAACATGCCAACGATGATAATGAGATTGAGAAGATAGA  
TTCGGATTGCTCGCAAAGCGAAGAGATACCTATCGAAATGTCCGACTCCGAGGACGAAACAACGGCAAGTAACATTAGCGG  
AATTTACTGGACATGTGAAAGCCAACCTCAACGTTGCTATTTCCCTCCGAGTACAGACTGGCCGTGACCGCGGCGCGG  
CGTAAACGTGGCGTGGTGGTTCGCGCACCGTTGAGTTCGAAGCGGGCGGCGTCTGACCAATTAACCGGTGA

### **EYFP**

GCCGCCACCATGGTGGAGCAAGGGCGAGGAGCTGTTACCGGGGTGGTGGCCATCCTGGTTCGAGCTGGACGGCGACGTAAC  
GGCACAAGTTCAGCGTTCGGGCGAGGGCGAGGGCGATGCCACCTACGGCAAGCTGACCTGAAGTTCATCTGCACCACC  
GGCAAGCTGCCGTGCCCTGGCCACCCTCGTACCACTTCGGCTACGGCCTGCAAGTCTTCGCCCCTACCCGACCCACAT  
GAAGCAGCAGACTTCTTCAAGTCCGCCATGCCGAAGGCTACGTCCAGGAGCGCACCATCTTCTTCAAGGACGACGGCAAC  
TACAAGACCCGCGCCGAGGTGAAGTTCGAGGGCGACACCCTGGTGAACCGCATCGAGCTGAAGGGCATCGACTTCAAGGAG  
GACGGCAACATCTGGGGCAAGCTGGAGTACAACATAACAGCCACAACGCTATATCATGCGCCGACAAAGCAGAAGAAC  
GGCATCAAGTGAAGATCCGCAACAACATCAGGACGCGCAGCTGCAGCTCGCCGACCTACCAAGCAGACCAACC  
CCCATCGGCGACGGCCCCGTGCTGCTGCCCCACAACCACTACCTGAGCTACCAGTCCAAGCTGAGCAAAGACCCCAACGAG  
AAGCGGATACATGGTCTGCTGGAGTTCGTGACCGCCCGGGATCACTCTCGGCATGGACGAGCTGTACAAGTGA

### **mKate2**

GCCGCCACCATGGTGGAGCGAGCTGATTAAGGAGAACATGCACATGAAGCTGTACATGGAGGGCACCGTGAACAACCACCAC  
TTCAAGTGCACATCCGAGGGCGAAGGCAAGCCCTACGAGGGCACCCAGACCATGAGAATCAAGGCGGTGAGGGCGGCCCT  
CTCCCTTCGCCTTCGACATCTGGCTACCAGCTTCATGTACGGCAGCAAAAACCTTCAATCAACCACACCCAGGGCATCCCCGA  
CTTCTTAAAGCAGTCTTCCCGAGGGCTTCACATGGGAGAGTACCACATACGAAGATGGGGGCGTGTGACCGCTACC  
CAGGACACCAGCTCCAGGACGGTGCCTCATCTACAACGTCAAGTACAGAGGGGTGAACCTCCCATCAACGGCCCTGTGA  
TGCAGAAGAACACTCGGCTGGGAGGCTCCACAGGACACTGTACCCCGTGCAGGCGGCGTGAAGGCAGAGCCGACA  
TGGCCCTGAAGCTCGTGGGCGGGGCCACCTGATCTGCAACCTTAAAGACCACATACAGATCCAAGAAAACCCGCTAAGAACCT  
CAAGATGCCCGCGTCTACTATGTGGACAGGAGCTGAAAAGAATCAAGGAGGCCGACAAGAGACATACGTCGAGCAGC  
ACGAGGTGGTGTGGCCAGATACTGCGACCTCCCTAGCAAACTGGGGCAAAAACCTAATTCCTGA

### **EBFP**

GCCGCCACCATGGTGGAGCAAGGGCGAGGAGCTGTTACCGGGGTGGTGGCCATCCTGGTTCGAGCTGGACGGCGACGTAAC  
GGCACAAGTTCAGCGTGGAGGGCGAGGGCGAGGGCGATGCCACCAACGGCAAGCTGACCTGAAGTTCATCTGCACCACC  
GGCAAGCTGCCGTGCCCTGGCCACCCTCGTACCACTGAGCCACGGCGTGCAGTCTTCGCCCCTACCCCGACCA  
TGAAGCAGCAGCACTTCTTCAAGTCCGCCATGCCGAAGGCTACGTCCAGGAGCGCACCATCTTCTTCAAGGACGACGGCAC



CTACAAGACCCGCGCGAGGTGAAGTTCGAGGGGCGACACCTAGTGAACCGCATCGAGCTGAAGGGCGTGCAGTTC AAGGA  
GGACGGCAACATCCTGGGGCACAAGCTGGAGTACAACCTCAACAGCCACAACATCTATATCATGGCCGTC AAGCAGAAGAA  
CGGCATCAAGGTGAAGTTC AAGATCCGCCACAACCTGGAGGACCGGCAGCGTGCAGCTCGCCGACCACTACCAGCAGAACAC  
CCCCATCGGCGACGGCCCCGTGCTGCTGCCGACAACCTCGAGGACCGGCAGCGTGCAGCTCGCCGACCACTACCAGCAGAACAC  
AAGCGCGATCATATGGTCTGCTGGAGTTCGCCACCGCCCGGGATCACTCTCGGCATGGACGAGCTGTACAAGTGA

**Cerulean**

GCCGCCACCATGGTGAGCAAGGGGCGAGGAGCTGTTACCGGGGTGGTGCCCATCCTGGTGCAGCTGGACGGCGACGTA AAC  
GGCCACAAGTTCAGCGTGTCCGGCGAGGGCGAGGGCGATGCCACCTACGGCAAGCTGACCCCTGAAGTTCATCTGCACCACC  
GGCAAGCTGCCGTGCCCTGGCCACCCTCGTGACCACCTTGGGGCGTGCAGTGCTTCGCCCGCTACCCCGACCACA  
TGAAGCAGCAGCACTTCTTCAAGTCCGCCATGCCGAAGGCTACGTCCAGGAGCGCACCATCTTCTTCAAGGACGACGGCAA  
CTACAAGACCCGCGCGAGGTGAAGTTCGAGGGGCGACACCTGGTGAACCGCATCGAGCTGAAGGGCATCGACTTCAAGGA  
GGACGGCAACATCCTGGGGCACAAGCTGGAGTACAACGCCATCAGCGACAACGTCTATATCACCGCCGACAAGCAGAAGAA  
CGGCATCAAGGGCAACTTCAAGATCCGCCACAACATCGAGGACCGGCAGCGTGCAGCTCGCCGACCACTACCAGCAGAACAC  
CCCCATCGGCGACGGCCCCGTGCTGCTGCCGACAACCACTACCTGAGCACCCAGTCCAAGCTGAGCAAAGACCCCAACGA  
GAAGCGGATCATATGGTCTGCTGGAGTTCGTGACCGCCCGGGATCACTCTCGGCATGGACGAGCTGTACAAGTGA

**mKate-2A-Puro**

GCCGCCACCATGGTGAGCGAGCTGATTAAGGAGAACATGCACATGAAGCTGTACATGGAGGGCACCGTGAACAACCACCAC  
TTC AAGTGCACATCCGAGGGCGAAGGCAAGCCCTACGAGGGCACCCAGACCATGAGAATCAAGGCGGTGAGGGCGGCCCT  
CTCCCTTCGCCTTCGACATCCTGGCTACCAGCTTCATGTACGGCAGCAAAACCTTCATCAACCACACCCAGGGCATCCCCGA  
CTTCTTTAAGCAGTCTTCCCGGAGGGCTTCACATGGGAGAGAGTCAACACATACGAAGATGGGGGCGTGTGACCGCTACC  
CAGGACACCAGCTCCAGGACGGTGCCTCATCTACAACGTCAAGATCAGAGGGGTGAACCTCCATCCAACGGCCCTGTGA  
TGCAGAAGAAAACACTCGGCTGGGAGGCCCTCCACCAGACACTGTACCCCGCTGACGGCGGCCCTGGAAGGCAGAGCCGACA  
TGGCCCTGAAGCTCGTGGGCGGGGCCACCTGATCTGCAACCTAAGACCACATACAGATCCAAGAAAACCCGCTAAGAACCT  
CAAGATGCCGGCGTCTACTATGTGGACAGGAGACTGGAAGAATCAAGGAGGCCGACAAAGAGACATACGTGAGCAGC  
ACGAGGTGGTGTGGCCAGATACTGCGACCTCCCTAGCAAACTGGGGCACAACTTAATGGAAGCGGAGCTACTAACTTCA  
GCCTGTGAAGCAGGTGGCGACGTGGAGGAGAACCCTGGACCTACCATGACCAGTACAAGCCACCGTGCCTCGCCA  
CCCGCGACGACGTCCCCGGGCGGTACGCACCCCTCGCCGCGCGTTCGCCGACTACCCCGCCACGCGCCACACCGTCCGACCC  
GGACCGCCACATCGAGCGGGTACCGAGCTGCAAGAACTTTCCTACGCGCGTCCGGCTCGACATCGGCAAGGTGTGGGT  
GCGGACGACGGCGCCGCGGTGGCGGTCTGGACCACGCCGAGAGCGTCAAGCGGGGGCGGTGTTCCGCCGAGATCGGCCCCG  
CGCATGGCCGAGTTGAGCGGTCCCAGCTGGCCGCGCAGCAACAGATGGAAGGCTCCTGGCCCGCACCGGCCAAGG  
CCCCGCTGGTTCTTGGCCACCGTCCGGCTTCGCCGACCCAGGGCAAGGGTCTGGGACGCGCGTCTGCTCCCCGGAG  
TGGAGGCGGCCGAGCGCCGGGGTCCCGCTTCTTGAGACATCCCGCCCCGCAACCTCCCTTCTACGAGCGGCTCCG  
CTTACCGTCAACCGCGACGTGAGGTCGCCGAAGGACCGCGCACCTGGTGCATGACCCGCAAGCCCGGTGCCTGA

**EYFP-2A-Hygro**

GCCGCCACCATGGTGAGCAAGGGGCGAGGAGCTGTTACCGGGGTGGTGCCCATCCTGGTGCAGCTGGACGGCGACGTA AAC  
GGCCACAAGTTCAGCGTGTCCGGCGAGGGCGAGGGCGATGCCACCTACGGCAAGCTGACCCCTGAAGTTCATCTGCACCACC  
GGCAAGCTGCCGTGCCCTGGCCACCCTCGTGACCACCTTCGGCTACGGCCTGCAGTGCTTCGCCCGCTACCCCGACCACAT  
GAAGCAGCAGCACTTCTTCAAGTCCGCCATGCCGAAGGCTACGTCCAGGAGCGCACCATCTTCTTCAAGGACGACGCGCAAC  
TACAAGACCCGCGCGAGGTGAAGTTCGAGGGGCGACACCTGGTGAACCGCATCGAGCTGAAGGGCATCGACTTCAAGGAG  
GACGGCAACATCCTGGGGCACAAGCTGGAGTACAACCTAGCAACAGCCACAACGTCTATATCATGGCCGACAAGCAGAAGAAC  
GGCATCAAGGTGAACCTTCAAGATCCGCCACAACATCGAGGACGGCAGCGTGCAGCTCGCCGACCACTACCAGCAGAACACC  
CCCATCGGCGACGGCCCCGTGCTGCTGCCGACAACCACTACCTGAGCTACCAGTCCAAGCTGAGCAAAGACCCCAACGAG  
AAGCGCGATCATATGGTCTGCTGGAGTTCGTGACCGCCCGGGATCACTCTCGGCATGGACGAGCTGTACAAGGGAAAGC  
GGAGTACTAACTTCAGCCTGCTGAAGCAGGCTGGCGACGTGGAGGAGAACCCTGGACCTGCCACCTGAAAAAGCCTGAA  
CTCACCGCGACGTCTGTCGAGAAGTTTCTGATCGAAAAGTTCGACAGCGTCTCCGACCTGATGCAGCTCTCGGAGGGCGAAG  
AATCTCGTCTTTCAGCTTCGATGTAGGAGGGCGTGGATATGTCTGCGGGTAAATAGCTGCGCCGATGGTTTCTACAAAGA  
TCGTTATGTTTATCGGCACTTTGCATCGGCCGCGCTCCCGATTCCGGAAGTGTGACATTGGGGAAATTCAGCGAGAGCCGTGA  
CCTATTGCATCTCCCGTCCGAGGTGTACAGTTGCAAGCTGAAACCGAATTCGACCTGCCCGTGTCTGACAGCCGTC  
GCGGAGGCCATGGATGCGATCGCTGCGGCCGATCTTAGCCAGACGAGCGGGTTCGGCCATTCCGACCGCAAGGAATCGGT  
CAATACACTACATGGCGTGATTCATATGCGCGATTGCTGATCCCCATGTGATCACTGGCAAACTGTGATGGACGACACCGT  
CAGTGCCTCCGTCGCGCAGGCTCTCGATGAGCTGATGCTTTGGGCCGAGGACTGCCCGAAGTCCGGCACCTCGTGCACCGG  
GATTTCCGCTCCAACAATGTCTGACGGACAATGGCCGACATAACAGCGGTCAATTGACTGGAGCGAGGCGATGTTCCGGGATT  
CCCAATACGAGGTTCGCAACATCTTCTTCTGGAGGCCGTGGTTGGCTTGTATGGAGCAGCAGACGCGCTACTTCGAGCGGAG  
GCATCCGGAGCTTGCAGGATCGCCGCGGCTCCGGGCTATATGCTCCGATTGGTCTTGACCAACTCTATCAGAGCTTGGTTG  
ACGGCAATTCGATGATGACGCTTGGGCGCAGGGTTCGATGCGACGCAATCGTCCGATCCGGAGCCGGGACTGTCCGGCGTAC  
ACAAATCGCCCGACAAGCGCGGCCGTCTGGACCGATGGCTGTGTAGAAGTACTCGCCGATAGTGAAACCGACGCCCCAG  
CACTCGTCCGGATCGGAGATGGGGGAGGCTAACTGA

**N-ter H2B localization tag**

GCCACCATGCCAGAGCCAGCGAAGTCTGCTCCCGCCCCGAAAAAGGGCTCCAAGAAGGCGGTGACTAAGGCGCAGAAGAAA  
GGCGGCAAGAAGCGCAAGCGCAGCCGCAAGGAGAGCTATTCCATCTATGTGTACAAGGTTCTGAAGCAGGTCCACCCTGAC  
ACCGCATTTCTGCCAAGGCCATGGGCATCAATCTGTTGTGAACGACATTTTCGAGCGCATCGCAGGTGAGGCTTCCC  
GCCTGGCGATTACAACAAGCGCTCGACCATCACTCCAGGGAGATCCAGACGGCCGTGCGCTGTGCTGCTGGGGAGTT  
GGCCAAGCAGCCGTGTCCGAGGGTACTAAGGCCATACCAAGTACACCAGCGCTAAG + linker:  
GATCCCCGGGTACCGGTCCGCCAC

**N-ter Smac mitochondria localization tag**

GCCGCCACCATGGCGGCTCTGAAGAGTTGGCTGTGCGCAGCGTAACTTCATTCTCAGGTACAGACAGTGTGTTGTGTGTTCC  
TGTGTTGGCTAACTTTAAGAAGCGGTGTTTCTCAGAATTGATAAGACCATGGCACAAAACCTGTGACGATTGGCTTTGGAGTA  
ACCCTGTGT + linker: GGATCAGGAGGATCAGGA

**C-ter Utrophin localization tag**

**Linker:** GGATCAGGAGGATCAGGA +

TCCGGAACCATGGCCAAGTATGGAGAACATGAAGCCAGTCTTGACAATGGGCAGAACGAATTCAGTGATATCATTAAAGTCC  
AGATCTGATGAACACAATGACGTACAGAAAGAAAACCTTTACCAAATGGATAAATGCTCGATTTTCAAAGAGTGGGAAACCA  
CCCATCAATGATATGTTACAGACCTCAAAGATGGAAGGAAGCTATTGGATCTTCTAGAAGGCCTCACAGGAACATCACTGC  
CAAAGGAACGTGGTTCCACAAGGGTACATGCCTTAAATAACGTCAACAGAGTGTCTGCAGGTTTACATCAGAACAAATGTGGA  
ATTAGTGAATATAGGGGGAACCGACATTGTGGATGGAATCACAAACTGACTTTGGGGTACTTTGGAGCATATTTTGCAC  
TGGCAGGTGAAAGATGTCATGAAGGATGTCATGTCGGACCTGCAGCAGACGAACAGTGAGAAGATCCTGCTCAGCTGGGTG  
CGTCAGACCACCAGGCCCTACAGCCAAGTCAACGTCTCAACTTCACCACCAGCTGGACAGATGGACTCGCCTTAAATGCTG  
TCCTCCACCAGACATAAACCTGATCTCTTCAGCTGGGATAAAGTTGTCAAAATGTCACCAATTGAGAGACTTGAACATGCCTTC  
AGCAAGGCTCAAACCTTATTTGGGAATTGAAAAGCTGTTAGATCCTGAAGATGTTGCCGTTCCGGCTCTCTGACAAGAAATCCA  
TAATTATGTATTTAACATCTTTGTTGAGGTGCTACCTCAGCAAGTACCATAGACTGA

**Recombination sites:**

**attB BxB1**

GGCTTGTGACGACGGCGGTCTCCGTCGTCAGGATCAT

**attP BxB1**

GTGGTTGTCTGGTCAACCACCGCGGTCTCAGTGGTGTACGGTACAAAACCCA

**Inert 5' UTR**

TAAGTTGTACAAAAAAGAG

**Polyadenylation signal:**

**rb glob polyA**

TGAATTCACCTCCTCAGGTGCAGGCTGCCTATCAGAAGGTGGTGGCTGGTGTGGCCAAATGCCCTGGCTCACAAATACCACTGA  
GATCTTTTTCCCTCGCCAAAAATTATGGGGACATCATGAAGCCCTTGAGCATCTGACTTCTGGCTAATAAAGGAAATTTAT  
TTTCATTGCAATAGTGTGTTGGAATTTTTGTGTCTCTCACTCGGAAGGACATATGGGAGGGCAAATCATTAAAAACATCAGA  
ATGAGTATTTGGTTTAGAGTTTGGCAACATATGCCCATATGCTGGCTGCCATGAACAAAGGTTGGCTATAAAGAGGTATCA  
GTATATGAAACAGCCCCCTGCTGTCCATTCCTTATCCATAGAAAAGCCTTGACTTGAGGTTAGATTTTTTTATATTTTGT  
TGTGTTATTTTTCTTTAACATCCCTAAAAATTTTCCTTACATGTTTACTAGCCAGATTTTTCTCTCTCTCTGACTACTCCA  
GTCATAGCTGTCCCTCTCTCTTATGGAGATCCCTCGAC

**Supplementary Text 4. DNA sequences of all plasmids from the mMoclo library.**

|                    |                                                                                                                                                                                                                                                                                                                                                                                                                                                                                                                                                                                                                                                                                                                                                                                                                                                                                                                                                                                                                                                                                                                                                                                                                                                                                                                                                                                                                                                                                                                                                                                                                                                                                                                                                                                                                                                                                                                                                                                                                                                                                                                                                                                                                                                                                                                                                                                                                                                                                                                                                                                                                     |
|--------------------|---------------------------------------------------------------------------------------------------------------------------------------------------------------------------------------------------------------------------------------------------------------------------------------------------------------------------------------------------------------------------------------------------------------------------------------------------------------------------------------------------------------------------------------------------------------------------------------------------------------------------------------------------------------------------------------------------------------------------------------------------------------------------------------------------------------------------------------------------------------------------------------------------------------------------------------------------------------------------------------------------------------------------------------------------------------------------------------------------------------------------------------------------------------------------------------------------------------------------------------------------------------------------------------------------------------------------------------------------------------------------------------------------------------------------------------------------------------------------------------------------------------------------------------------------------------------------------------------------------------------------------------------------------------------------------------------------------------------------------------------------------------------------------------------------------------------------------------------------------------------------------------------------------------------------------------------------------------------------------------------------------------------------------------------------------------------------------------------------------------------------------------------------------------------------------------------------------------------------------------------------------------------------------------------------------------------------------------------------------------------------------------------------------------------------------------------------------------------------------------------------------------------------------------------------------------------------------------------------------------------|
| <b>p_Insulator</b> | GTGGCTCTCAGTGGACGAAAGGCCCTCGTGATACGCCTATTTTTATAGGTTAATGTCATGATAAT<br>AATGGTTTCTTAGACGTGAGGTGGCACTTTTCGGGGAAATGTGCGCGGAACCCCTATTTGTTTATT<br>TTTCTAAATACATTCAAATATGTATCCGCTCATGAGACAATAACCCTGATAAATGCTTCAATAATAT<br>TGAAAAAGGAAGAGTATGCGCTCACGCAACTGGTCCAGAACCTTGACCGAACGCAGCGGTGGTAA<br>CGGCGCAGTGGCGGTTTTCATGGCTTGTATGCTTTTTTTGGGGTACAGTCTATGCCCTCGGGC<br>ATCCAAGCAGCAAGCGCGTTACGCCGTGATGTTTGTATGTTATGGAGCAGCAACGATGTTA<br>CGCAGCAGGGCAGTCGCCCTAAAACAAAGTAAACATCATGAGGGAAGCGGTGATCGCCGAAGTA<br>TCGACTCAACTATCAGAGGTAGTTGGCGTCATCGAGCGCCATCTCGAACCGACGTTGCTGGCCGT<br>ACATTTGTACGGCTCCGAGTGGATGGCGGCTGAAGCCACACAGCGATATTGATTGCTGGTTA<br>CGGTGACCGTAAGGCTTGATGAAACAACGCGGAGGACTTTGATCAACGACCTTTTGAAAACTTCG<br>GCTTCCCCTGGAGAGCGAGATTCTCCGCGCTGTAGAAGTACCATTGTTGTGCACGACGACAT<br>CATTCCGTGGCGTTATCCAGCTAAGCGCGAAGTGAATTTGGAGAAATGGCAGCGCAATGACATTC<br>TTGCAGGTATCTTCGAGCCAGCCAGATCGACATTGATCTGGCTATCTTGTGACAAAAGCAAGAG<br>AACATAGCGTTGCCCTGGTAGGTTCCAGCGCGGAGGAACCTTTTGATCCGGTCTCTGAACAGGAT<br>CTATTTGAGGCGCTAAATGAAACCTTAAACGCTATGGAACCTCGCCGCCGACTGGGCTGGCGATGA<br>GCGAAATGTAGTGTACGTTGTCCCGCATTGGTACAGCGCAGTAACCGGCAAAAATCGCGCCGA<br>AGGATGTCGCTGCCGACTGGGCAATGGAGCGCTGCCGGCCAGTATCAGCCCGTCATACTTGAA<br>GCTAGACAGGCTTATCTTGGACAAGAAGAAGATCGCTTGGCCTCGCGCGAGATCAGTTGGAAGA<br>ATTTGTCCATTACGTA AAAAGGCGAGATCACC AAGGTAGTCGGCAAATAAATGTCAGACCAAGTTTA<br>CTCATATATACTTTAGATTGATTTAAACTTCATTTTTAATTTAAAAGGATCTAGGTGAAGATCCTT<br>TTTGATAATCTCATGACCAAAATCCCTTAAACGTGAGTTTTTCGTTCCACTGAGCGTCAGACCCCGTA<br>GAAAAGATCAAAGGATCTTCTTGAGATCCTTTTTTCTGCGGTAATCTGCTGTTGCAAAACAAA<br>AAACCACCGCTACCAGCGGTGTTTGTGTTGCGGATCAAGAGCTACCAACTCTTTTTCCGAAGGTA<br>ACTGGCTTCAGCAGAGCGCAGATACCAATACTGTCCTTCTAGTGTAGCCGTAGTTAGGCCACCAC<br>TTCAAGAACTCTGTAGCACCAGCTACATACCTCGCTGCTAATCCTGTTACCAGTGGCTGCTGCC<br>AGTGGCGATAAGTCGTGCTTACCGGGTGGACTCAAGACGATAGTTACCGGATAAGGCGCAGCG<br>GTCGGGCTGAACGGGGGGTTCGTGCACACAGCCAGCTTGGAGCGAACGACCTGACCCAACTGA<br>GATACCTACAGCGTGAGCTATGAGAAAGCGCCACGCTTCCCGAAGGGAGAAAGGCGGACAGGTAT<br>CCGGTAAGCGGCAGGGTCCGAACAGGAGAGCGCACGAGGGAGCTTCCAGGGGAAACCGCTGGT<br>ATCTTTATAGTCTGTGCGGTTTCGCCACCTCTGACTTGGAGCGTCGATTTTTGTGATGCTCGTCA<br>GGGGCGGAGCCTATGAAAAACGCCAGCAACGCGGCCCTTTTTACGGTTCTGGCCTTTTGTGCTG<br>CCTTTTGTCTACATGTTCTTCTGCGTTATCCCCTGATTCTGTGGATAACCGTATTACCGCCTTTG<br>AGTGAGCTGATACCGCTCGCCGACGCCGAACGACCGGAGCGCAGCGAGTCACTGAGCGAGGAAGC<br>GGAAGAGCGCCCAATACGCAACCGCTCTCCCGCGGTTGGCCGATTCAATCACTCTGTG<br>GTCTCAGGAGTTGTCTTCGAGCTGGCACAGAGTTTCCGACTGGAAGCGGAGGAGCGC<br>AACGCAATTAATGTGAGTTAGCTCACTCATTAGGCACCCAGGCTTTACACTTTATGCTTCCGGCT<br>CGTATGTTGTGGAATTGTGAGCGGATAACAATTTACACAGGAAACAGCTATGACCATGATTAC |
|--------------------|---------------------------------------------------------------------------------------------------------------------------------------------------------------------------------------------------------------------------------------------------------------------------------------------------------------------------------------------------------------------------------------------------------------------------------------------------------------------------------------------------------------------------------------------------------------------------------------------------------------------------------------------------------------------------------------------------------------------------------------------------------------------------------------------------------------------------------------------------------------------------------------------------------------------------------------------------------------------------------------------------------------------------------------------------------------------------------------------------------------------------------------------------------------------------------------------------------------------------------------------------------------------------------------------------------------------------------------------------------------------------------------------------------------------------------------------------------------------------------------------------------------------------------------------------------------------------------------------------------------------------------------------------------------------------------------------------------------------------------------------------------------------------------------------------------------------------------------------------------------------------------------------------------------------------------------------------------------------------------------------------------------------------------------------------------------------------------------------------------------------------------------------------------------------------------------------------------------------------------------------------------------------------------------------------------------------------------------------------------------------------------------------------------------------------------------------------------------------------------------------------------------------------------------------------------------------------------------------------------------------|

|                          |                                                                                                                                                                                                                                                                                                                                                                                                                                                                                                                                                                                                                                                                                                                                                                                                                                                                                                                                                                                                                                                                                                                                                                                                                                                                                                                                                                                                                                                                                                                                                                                                                                                                                                                                                                                                                                                                                                                                                                                                                                                                                                                                                                                                                                                                                                                                                                                                                                                                                                                                                                                                                                                                                                                                                                                                                                                                                                                                                                                                                                                                                                                                                                                                               |
|--------------------------|---------------------------------------------------------------------------------------------------------------------------------------------------------------------------------------------------------------------------------------------------------------------------------------------------------------------------------------------------------------------------------------------------------------------------------------------------------------------------------------------------------------------------------------------------------------------------------------------------------------------------------------------------------------------------------------------------------------------------------------------------------------------------------------------------------------------------------------------------------------------------------------------------------------------------------------------------------------------------------------------------------------------------------------------------------------------------------------------------------------------------------------------------------------------------------------------------------------------------------------------------------------------------------------------------------------------------------------------------------------------------------------------------------------------------------------------------------------------------------------------------------------------------------------------------------------------------------------------------------------------------------------------------------------------------------------------------------------------------------------------------------------------------------------------------------------------------------------------------------------------------------------------------------------------------------------------------------------------------------------------------------------------------------------------------------------------------------------------------------------------------------------------------------------------------------------------------------------------------------------------------------------------------------------------------------------------------------------------------------------------------------------------------------------------------------------------------------------------------------------------------------------------------------------------------------------------------------------------------------------------------------------------------------------------------------------------------------------------------------------------------------------------------------------------------------------------------------------------------------------------------------------------------------------------------------------------------------------------------------------------------------------------------------------------------------------------------------------------------------------------------------------------------------------------------------------------------------------|
|                          | <p>GCCAAGCTTGCATGCCTGCAGGTCGACTCTAGAGGATCCCCGGGTACCGAGCTCGAATTCACCTGG<br/> CCGTCGTTTTACAACGTCGTGACTGGGAAAACCCCTGGCGTTACCCAACTTAATCGCCTTGCAGCAC<br/> ATCCCCCTTTCGCCAGCTGGCGTAATAGCGAAGAGGCCCGCACCCGATCGCCCTCCCAAAGCTTG<br/> CGCAGCCTGAATGGCAATGGCGCCTGATGCGGTATTTTCTCCTTACGCAATCTGTGCGGTATTTCA<br/> CACCCGCATATGGTGCCTCTCAGTACAATCTGCTCTGATGCCGCATAGTTAAGCCAGCCCCGACAC<br/> CCGCCAACACCCCGCTGACGCGCCCTGACGGGCTTGTCTGCTCCCGGCATCCGCTTACAGACAAGC<br/> TGTGACGAAGACAATACTTGAGACCAGAA</p>                                                                                                                                                                                                                                                                                                                                                                                                                                                                                                                                                                                                                                                                                                                                                                                                                                                                                                                                                                                                                                                                                                                                                                                                                                                                                                                                                                                                                                                                                                                                                                                                                                                                                                                                                                                                                                                                                                                                                                                                                                                                                                                                                                                                                                                                                                                                                                                                                                                                                                                                                                                                                                                                                                                          |
| <p><b>p_Promoter</b></p> | <p>GTGGCTCTCAGTGGACGAAAGGGCCTCGTGATACGCCTATTTTTATAGGTTAATGTCATGATAAT<br/> AATGGTTTCTTAGACGTCAGGTGGCACTTTTCGGGGAAATGTGCGCGGAACCCCTATTTGTTTATT<br/> TTTCTAAATACATTCAAATATGTATCCGCTCATGAGACAATAACCCTGATAAATGCTTCAATAATAT<br/> TGAAAAAGGAAGAGTATGCGCTCACGCAACTGGTCCAGAACCCTTGACCGAACGCAGCGGTGGTAA<br/> CGGCGCAGTGGCGGTTTTTCATGGCTTGTATGACTGTTTTTTTTGGGGTACAGTCTATGCCCTGGGC<br/> ATCCAAGCAGCAAGCGCGTTACGCCGTGGGTGATGTTTGTATGTTATGGAGCAGCAACGATGTTA<br/> CGCAGCAGGGCAGTCGCCCTAAAACAAAGTTAAACATCATGAGGGAAGCGGTGATCGCCGAAGTA<br/> TCGACTCAACTATCAGAGGTAGTTGGCGTCATCGAGCGCCATCTCGAACCGACGTTGCTGGCCGT<br/> ACATTTGTACGGCTCCGAGTGGATGGCGGCCTGAAGCCACACAGCGATATTGATTGCTGGTTA<br/> CGGTGACCGTAAGGCTTGATGAAAACAACGCGGCGAGCTTTGATCAACGACCTTTTGGAAAACCTCG<br/> GCTTCCCCTGGAGAGAGCGAGATTCTCCGCGCTGTAGAAGTCACCATTGTTGTGCACGACGACAT<br/> CATTCGTTGGCGTTATCCAGCTAAGCGCGAAGTGAATTTGGAGAATGGCAGCGCAATGACATTC<br/> TTGCAGGTATCTTCGAGCCAGCCACGATCGACATTGATCTGGCTATCTTGTGACAAAAGCAAGAG<br/> AACATAGCGTTGCCCTGGTAGGTCCAGCGCGGAGGAACTCTTTGATCCGTTCCGTAACAGGAT<br/> CTATTTGAGGCGCTAAATGAAACCTTAACGCTATGGAACCTCGCCGCCGACTGGGCTGGCGATGA<br/> GCGAAATGTAGTGCTTACGTTGTCCCGCATTGGTACAGCGCAGTAACCGGCAAAAATCGCGCCGA<br/> AGGATGTCGCTGCCGACTGGGCAATGGAGCGCCTGCCGGCCAGTATCAGCCCGTCACTACTTGAA<br/> GCTAGACAGGCTTATCTTGGACAAGAAGAAGATCGCTTGGCCTCGCGCGCAGATCAGTTGGAAGA<br/> ATTTGTCCATTACGTA AAAAGGCGAGATCACCAAGGTAGTCGGCAAATAACTGTCAGACCAAGTTTA<br/> CTCATATATACTTTAGATTGATTTAAAACCTTCATTTTTAATTTAAAAGGATCTAGGTGAAGATCCTT<br/> TTGATAATCTCATGACCAAAATCCCTTAACGTGAGTTTTTCGTTCCACTGAGCGTCAGACCCCGTA<br/> GAAAAGATCAAAGGATCTTCTTGAGATCCTTTTTCTGCGGTAATCTGCTGCTTGCAAAACAAA<br/> AAACCACCGCTACCAGCGTGGTTTGTGGCGGATCAAGAGCTACCAACTTTTTCCGAAGGTA<br/> ACTGGCTTCAGCAGAGCGCAGATACCAATACTGTCCTTCTAGTGTAGCCGTAGTTAGGCCACCAC<br/> TTCAAGAACTCTGTAGCACCAGCTACATACCTCGCTCTGCTAATCCTGTTACCAGTGGCTGCTGCC<br/> AGTGGCGATAAGTCGTGCTTACCGGGTGGACTCAAGACGATAGTTACCAGGATAAGCGCGCAGCG<br/> GTCGGGCTGAACGGGGGGTTCGTGCACACAGCCAGCTTGGAGCGAACGACCTAACCCGAAGTGA<br/> GATACCTACAGCGTGAGCTATGAGAAAAGCGCCACGCTTCCCGAAGGGAGAAAAGGCGGACAGGTAT<br/> CCGGTAAGCGGCAGGGTCCGAACAGGAGAGCGCAGGAGGAGCTTCCAGGGGGAAACCGCTGGT<br/> ATCTTTATAGTCTGTGCGGTTTTCGCCACCTCTGACTTGAGCGTCGATTTTTGTGATGCTCGTCA<br/> GGTTGCGGAGCCTATGAAAAACCGCAACGCGGCTTTTTTACGGTTCTGGCCTTTTGTCTGG<br/> CCTTTTGCTCATATGTTCTTTCCTGCGTTATCCCCTGATTCTGTGGATAACCGTATTACCGCCTTTG<br/> AGTGAGCTGATACCGCTCGCCGACGCCGAACGACCGAGCGCAGCGAGTCAGTGAGCGAGGAAGC<br/> GGAAGAGCGCCCAATACGCAACCCGCTCTCCCCGCGGTTGGCCGATTCAATCACTCTGTG<br/> GTCTCATACTTTGTCTTCGAGCTGGCAGCAGCAGGTTTCCGACTGGAACGCGGAGCTGAGCGC<br/> AACGCAATTAATGTGAGTTAGCTCACTCATTAGGCACCCAGGCTTTAACACTTTATGCTTCCGGCT<br/> CGTATGTTGTGTTGAATTGTGAGCGGATAACAATTTACACAGGAAACAGCTATGACCATGATTAC<br/> GCCAAGCTTGCATGCCTGCAGGTCGACTCTAGAGGATCCCCGGGTACCGAGCTCGAATTCAGTGG<br/> CCGTCGTTTTACAACGTCGTGACTGGGAAAACCTGGCGTTACCAACTTAATCGCCTTGCAGCAC<br/> ATCCCCCTTTCGCCAGCTGGCGTAATAGCGAAGAGGCCCGCACACCGATCGCCCTCCCAACAGTTG<br/> CGCAGCCTGAATGGCGAATGGCGCCTGATGCGGTATTTCTCCTTACGCATCTGTGCGGTATTTCA<br/> CACCGCATATGGTGCCTCTCAGTACAATCTGCTCTGATGCCGCATAGTTAAGCCAGCCCCGACAC<br/> CCGCCAACACCCGCTGACGCGCCCTGACGGGCTTGTCTGCTCCCGGCATCCGCTTACAGACAAGC<br/> TGTGACGAAGACAATAATGTGAGACCAGAA</p> |
| <p><b>P_5'UTR</b></p>    | <p>GTGGCTCTCAGTGGACGAAAGGGCCTCGTGATACGCCTATTTTTATAGGTTAATGTCATGATAAT<br/> AATGGTTTCTTAGACGTCAGGTGGCACTTTTCGGGGAAATGTGCGCGGAACCCCTATTTGTTTATT<br/> TTTCTAAATACATTCAAATATGTATCCGCTCATGAGACAATAACCCTGATAAATGCTTCAATAATAT<br/> TGAAAAAGGAAGAGTATGCGCTCACGCAACTGGTCCAGAACCCTTGACCAACGCGAGCGGTGGTAA<br/> CGGCGCAGTGGCGGTTTTTCATGGCTTGTATGACTGTTTTTTTTGGGGTACAGTCTATGCCCTGGGC<br/> ATCCAAGCAGCAAGCGCGTTACGCCGTGGGTGATGTTTGTATGTTATGGAGCAGCAACGATGTTA<br/> CGCAGCAGGGCAGTCGCCCTAAAACAAAGTTAAACATCATGAGGGAAGCGGTGATCGCCGAAGTA<br/> TCGACTCAACTATCAGAGGTAGTTGGCGTCATCGAGCGCCATCTCGAACCGACGTTGCTGGCCGT<br/> ACATTTGTACGGCTCCGCAAGTGGATGGCGAAGCGCCAGCTTTGATCAACGACCTTTTGGAAAACCTCG<br/> CGGTGACCGTAAGGCTTGATGAAAACAACGCGGCGAGCTTTGATCAACGACCTTTTGGAAAACCTCG<br/> GCTTCCCCTGGAGAGAGCGAGATTCTCCGCGCTGTAGAAGTCACCATTGTTGTGCACGACGACAT<br/> CATTCGTTGGCGTTATCCAGCTAAGCGCGAAGTGAATTTGGAGAATGGCAGCGCAATGACATTC<br/> TTGAGGTTATCTTCGAGCCAGCCAGATCGACTGATGATCTGCTGCTATCTTGTGACAAAAGCAAGAG<br/> AACATAGCGTTGCCCTGGTAGGTCCAGCGGCGGAGGAACTCTTTGATCCGTTCCCTGAACAGGAT<br/> CTATTTGAGGCGCTAAATGAAACCTTAACGCTATGGAACCTCGCCGCCGACTGGGCTGGCGATGA<br/> GCGAAATGTAGTGCTTACGTTGTCCCGCATTGGTACAGCGCAGTAACCGGCAAAAATCGCGCCGA<br/> AGGATGTCGCTGCCGACTGGGCAATGGAGCGCCTGCCGGCCAGTATCAGCCGCACTCATACTTGAA<br/> GCTAGACAGGCTTATCTTGGACAAGAAGAAGATCGCTTGGCCTCGCGCGCAGATCAGTTGGAAGA<br/> ATTTGTCCATTACGTA AAAAGGCGAGATCACCAAGGTAGTCGGCAAATAACTGTCAGACCAAGTTTA<br/> TTTGATAATCTCATGACCAAAATCCCTTAACGCTATGGAACCTCGCCGCCGACTGGGCTGGCGATGA<br/> GAAAAGATCAAAGGATCTTCTTGAGATCCTTTTTTTCTGCGGTAATCTGCTGCTTGCAAAACAAA<br/> AAACCACCGCTACCAGCGTGGTTTGTGGCGGATCAAGAGCTACCAACTTTTTCCGAAGGTA<br/> ACTGGCTTCAGCAGAGCGCAGATACCAATACTGTCCTTCTAGTGTAGCCGTAGTTAGGCCACCAC<br/> TTCAAGAACTCTGTAGCACCAGCTACATACCTCGCTCTGCTAATCCTGTTACCAGTGGCTGCTGCC<br/> AGTGGCGATAAGTCGTGCTTACCGGGTGGACTCAAGACGATAGTTACCAGGATAAGCGCGCAGCG<br/> GTCGGGCTGAACGGGGGGTTCGTGCACACAGCCAGCTTGGAGCGAACGACCTACACCGAAGTGA</p>                                                                                                                                                                                                                                                                                                                                                                                                                                                                                                                                                                                                                                                                                                                                                                                                                                                                                                                                                                                                                                                                                                                                                                                                                                                                        |

|                       |                                                                                                                                                                                                                                                                                                                                                                                                                                                                                                                                                                                                                                                                                                                                                                                                                                                                                                                                                                                                                                                                                                                                                                                                                                                                                                                                                                                                                                                                                                                                                                                                                                                                                                                                                                                                                                                                                                                                                                                                                                                                                                                                                                                                                                                                                                                                                                                                                                                                                                                                                                                                                                                                                                                                                                                                                                                                                                                                                                                                                                                                                                                                                                                       |
|-----------------------|---------------------------------------------------------------------------------------------------------------------------------------------------------------------------------------------------------------------------------------------------------------------------------------------------------------------------------------------------------------------------------------------------------------------------------------------------------------------------------------------------------------------------------------------------------------------------------------------------------------------------------------------------------------------------------------------------------------------------------------------------------------------------------------------------------------------------------------------------------------------------------------------------------------------------------------------------------------------------------------------------------------------------------------------------------------------------------------------------------------------------------------------------------------------------------------------------------------------------------------------------------------------------------------------------------------------------------------------------------------------------------------------------------------------------------------------------------------------------------------------------------------------------------------------------------------------------------------------------------------------------------------------------------------------------------------------------------------------------------------------------------------------------------------------------------------------------------------------------------------------------------------------------------------------------------------------------------------------------------------------------------------------------------------------------------------------------------------------------------------------------------------------------------------------------------------------------------------------------------------------------------------------------------------------------------------------------------------------------------------------------------------------------------------------------------------------------------------------------------------------------------------------------------------------------------------------------------------------------------------------------------------------------------------------------------------------------------------------------------------------------------------------------------------------------------------------------------------------------------------------------------------------------------------------------------------------------------------------------------------------------------------------------------------------------------------------------------------------------------------------------------------------------------------------------------------|
|                       | <p>GATACCTACAGCGTGAGCTATGAGAAAAGCGCCACGCTTCCCGAAGGGAGAAAAGCGGGACAGGTAT<br/> CCGGTAAGCGGCAGGGTTCGGAAACAGGAGAGCGCACGAGGGAGCTTCCAGGGGAAACCGCTGGT<br/> ATCTTTATAGTCTGTCTGGGTTTCGCCACCTTGACTTGAGCGTCTGATTTTTGTGTATGCTCTGTCAG<br/> GGGGCGGAGCCTATGGAAAAACCGCCAGCAACCGCGCCTTTTACGGTTTCTGGCCTTTTGGCTGG<br/> CCTTTTGCTCACATGTTCTTCTGCGTATCCCCTGATTCTGTGGATAACCGTATTACCGCCTTTG<br/> AGTGAGCTGATACCGCTCGCCGAGCCGAACGACCGAGCGCAGCGAGTCACTGAGCGAGGAAGC<br/> GGAAGAGCGCCCAATACGCAAACCGCCTTCCCCGCGGTTGGCCGATTCAATCACTCTGTG<br/> GTCTCAAATGTTGTCTTCGAGCTGGCAGCAGGTTTCCCGACTGGAAAGCGGGCAGTGAGCGC<br/> AACGCAATTAATGTGAGTTAGCTCACTCATTAGGCACCCAGGCTTTACACTTTATGCTTCCGGCT<br/> CGTATGTTGTGTGGAATTGTGAGCGGATAACAATTTACACAGGAAACAGCTATGACCATGATTAC<br/> GCCAAGCTTGCATGCCTGCAGGTCGACTCTAGAGGATCCCCGGGTACCGAGCTCGAATCACTG<br/> CCGTCGTTTTACAACGTGTGACTGGGAAAACCTGGCGTTACCCAACCTAATCGCCTTGCAGCAC<br/> ATCCCCCTTTCGCCAGCTGGCGTAATAGCGAAGAGGCCCGCACCGATCGCCCTTCCCAACAGTTG<br/> CGCAGCCTGAATGGCGAATGGCGCCTGATGCGGTATTTCTCCTTACGCATCTGTGCGGTATTTCA<br/> CACCGCATATGGTCACTCTCAGTACAATCTGCTCTGATGCCGATAGTTAAGCCAGCCCCGACAC<br/> CCGCCAACACCCGCTGACGCGCCTGACGGGCTTGTCTGCTCCCGCATCCGCTTACAGACAAGC<br/> TGTGACGAAGACAAGGTTGAGACCAGAA</p>                                                                                                                                                                                                                                                                                                                                                                                                                                                                                                                                                                                                                                                                                                                                                                                                                                                                                                                                                                                                                                                                                                                                                                                                                                                                                                                                                                                                                                                                                                                                                                                                                                                                                                                                                                                                                                                                                                                                                                               |
| <p><b>P_Gene</b></p>  | <p>GTGGCTCTCAGTGGACGAAAAGGCGCTCGTGATACGCCTATTTTTATAGGTTAATGTCATGATAAT<br/> AATGGTTTCTTAGACGTCAGGTGGCACTTTTCGGGGAAATGTGCGCGGAACCCCTATTTGTTTATT<br/> TTTCTAAATACATTCAAATATGTATCCGCTCATGAGACAATAACCCTGATAAATGCTTCAATAATAT<br/> TGAAAAAGGAAGAGTATGCGCTCACGCAACTGGTCCAGAACCTTGACCGAACGCGGTGGCTGAA<br/> CGGGCAGTGGCGGTTTTTCATGGCTTGTATGACTGTTTTTTTTGGGGTACAGTCTATGCCTCGGGC<br/> ATCCAAGCAGCAAGCGGTTACGCCGTGGGTGATGTTTGTATGTTATGGAGCAGCAACGATGTTA<br/> CGCAGCAGGGCAGTCCGCTAAAACAAAGTTAAACATCATGAGGGAAGCGGTGATCGCCGAAGTA<br/> TTCAGTCAACTATCAGAGGTAGTTGGCGTATCGAGCGCCATCTCGAACCGTGTGCTGATGCTG<br/> ACATTTGTACGGCTCCGCAAGTGGATGGCGGCTGAAGCCACACAGCGATATTGATTGCTGGTTA<br/> CGGTGACCGTAAGGCTTGTGAAACAACCGGGCAGCTTTGATCAACGACCTTTTGGAACTTCG<br/> GCTTCCCTGGAGAGCGGATTTCTCCGCGCTGAGAAGTACCATTGTTGTCACGACGACAT<br/> CATTCCGTGGCGTTATCCAGCTAAGCGCAACTGCAATTTGGAGAATGGCAGCGCAATGACATTC<br/> TTGCAGGTATCTTCGAGCCAGCCAGCATCGACATTGATCTGGCTATCTTGTGACAAAAGCAAGAG<br/> AACATAGCGTTGCCTTGGTAGGTCCAGCGGGGAGGAACTCTTTGATCCGGTTCCTGAACAGGAT<br/> CTATTGAGGCGCTAAATGAAACCTTAACGCTATGGAACCTCGCCGCCGACTGGGCTGGCGATGA<br/> CGGAAATGTAGTGCTTACGTTGTCCCGCATTTGGTACAGCGCAGTAACCGGAAAATCGCGCCGA<br/> AGGATTCGCTGCCGACTGGGCAATGGAGCGCTGCGCCGAGTATCGCCGCCCAGTATCAGCCGTCATACTTGAA<br/> GCTAGACAGGCTTATCTTGGACAAGAAGAAGATCGCTTGGCCTCGCGCGCAGATCAGTTGGAAGA<br/> ATTTGTCCATTACGTAAGGCGGAGATCACCAAGGTAGTCGGCAAATAACTGTCAGACCAAGTTTA<br/> CTCATATATACTTTAGATTGATTTAAAACCTTCAATTTTAAATTTAAAAGGATCTAGGTGAAGATCTCT<br/> TTTGATAATCTCATGACCAAAATCCCTTAAAGCTGAGTGTTCGTTCCACTAGCCGTCAGACCCGTA<br/> GAAAAGATCAAAGGATCTTCTTGGATCCTTTTTTTCTGCGGTAATCTGCTGCTTGCAAAACAAAA<br/> AAACCACCGTACCAGCGGTGGTTTGGTTGCGGATCAAGAGCTACCAACTCTTTTCCGAAGGTA<br/> ACTGGCTTACAGCAGCGCAGATACCAAACTGCTCTTCTAGTGTAGCCGATGTTAGGCCACACC<br/> TTCAAGAACTCTGTAGCACCCGCTACATACCTCGTCTGCTAATCCTGTACCAGTGGCTGTGCC<br/> AGTGGCGATAAGTCTGTCTTACCAGGTTGGACTCAAGACGATAGTTACCAGGATAAGGCGCAGCG<br/> GTCGGGCTGAACGGGGGTTCTGTGCACACAGCCAGCTTGGAGCGAACGACCTACACCGAACTGA<br/> GATACCTACAGCGTGAGCTATGAGAAAAGCGCCACGCTTCCCGAAGGGAGAAAAGGCGGACAGGAT<br/> CCGTAAGCGGCGAGGTCGGAACAGGAGAGCGCACGAGGGAGCTTCCAGGGGAAAACCGCTGTT<br/> ATCTTATAGTCTGTCCGGTTTTCGCCACCTTGAAGCTGAGCGTCTGATTTTGTGATGCTCGTCA<br/> GGGGGCGGAGCCTATGGAAAAACGCCAGCAACCGGCTTTTTACGGTTCCTGGCCTTTTGTCTGG<br/> CCTTTGCTCACATGTTCTTCTGCGTATCCCCTGATTCTGTGGATAACCGTATTACCGCCTTTG<br/> AGTGAGCTGATACCGCTCGCCGAGCCGAACGACCGAGCGAGTCACTGAGCGAGGAAAGC<br/> GGAAGAGCGCCCAATACGCAAACCGCCTTCCCCGCGGTTGGCCGATTCAATTAATCACTCTGTG<br/> GTCTCAAGGTTTGTCTTCGAGCTGGCAGCAGAGGTTTCCCGACTGGAAAGCGGGCAGTGAGCGC<br/> AACGCAATTAATGTGAGTTAGCTCACTCATTAGGCACCCAGGCTTTACACTTTATGCTTCCGGCT<br/> CGTATGTTGTGTGGAATTGTGAGCGGATAACAATTTACACAGGAAACAGTATGACCATGATTAC<br/> GCCAAGCTTGCATGCCGTCAGGTCGACTATGAGGATCCCCGGTACCAGTCTGAAATCACTGG<br/> CCGTCGTTTTACAACGTGTGACTGGGAAAACCTGGCGTTACCCAACCTAATCGCCTTGCAGCAC<br/> ATCCCCCTTTCGCCAGCTGGCGTAATAGCGAAGAGGCCCGCACCGATCGCCCTTCCCAACAGTTG<br/> CGCAGCCTGAATGGCGAATGGCGCCTGATGCGGTATTTTCTCCTTACGCATCTGTGCGGTATTTCA<br/> CACCGCATATGGTCACTCTCAGTACAATCTGCTCTGATGCGCATAGTTAAGCCAGCCCCGACAC<br/> CCGCCAACACCCGCTGACGCGCCTGACGGGCTTGTCTGCTCCCGCATCCGCTTACAGACAAGC<br/> TGTGACGAAGACAAGCTTTGAGACCAGAA</p> |
| <p><b>P_3'UTR</b></p> | <p>GTGGCTCTCAGTGGACGAAAAGGCGCTCGTGATACGCCTATTTTTATAGGTTAATGTCATGATAAT<br/> AATGGTTTCTTAGACGTCAGGTGGCACTTTTCGGGGAAATGTGCGCGGAACCCCTATTTGTTTATT<br/> TTTCTAAATACATTCAAATATGTATCCGCTCATGAGACAATAACCCTGATAAATGCTTCAATAATAT<br/> TGAAAAAGGAAGAGTATGCGCTCACGCAACTGGTCCAGAACCTTGACCGAACGCGGTGGTAA<br/> CGGGCAGTGGCGGTTTTTCATGGCTTGTATGACTGTTTTTTTTGGGGTACAGTCTATGCCTCGGGC<br/> ATCCAAGCAGCAAGCGGTTACGCCGTGGGTGATGTTTGTATGTTATGGAGCAGCAACGATGTTA<br/> CGCAGCAGGGCAGTCCGCTAAAACAAAGTTAAACATCATGAGGGAAGCGGTGGTGCAGCAAGTA<br/> TCGACTCAACTATCAGAGGTAGTTGGCGTATCGAGCGCCATCTCGAACCGACGTTGCTGGCCGT<br/> ACATTTGTACGGCTCCGCAAGTGGATGGCGGCTGAAGCCACACAGCGATATTGATTGCTGGTTA<br/> CGGTGACCGTAAGGCTTGTGAAACAACCGGGCAGCTTTGATCAACGACCTTTTGGAACTTCG<br/> GCTTCCCTGGAGAGAGCGAGATTTCTCCGCGCTGTAGAAGTACCATTGTTGTGACGACGACAT<br/> CATTCCGTGGCGTTATCCAGCTAAGCGCAACTGCAATTTGGAGAATGGCAGCGCAATGACATTC<br/> TTGCAGGTATCTTCGAGCCAGCCAGCATCGACATTGATCTGGCTATCTTGTGACAAAAGCAAGAG<br/> AACATAGCGTTGCCTTGGTAGGTCCAGCGGGGAGGAACTCTTTGATCCGGTTCCTGAACAGGAT<br/> CTATTGAGGCGCTAAATGAAACCTTAACGCTATGGAACCTCGCCGCCGACTGGGCTGGCGATGA<br/> CGGAAATGTAGTGCTTACGTTGTCCCGCATTTGGTACAGCGCAGTAACCGGAAAATCGCGCGGA<br/> AGGATGTCGCTGCCGACTGGGCAATGGAGCGCTGCGGGCCAGTATCAGCCCGTCATACTTGAA</p>                                                                                                                                                                                                                                                                                                                                                                                                                                                                                                                                                                                                                                                                                                                                                                                                                                                                                                                                                                                                                                                                                                                                                                                                                                                                                                                                                                                                                                                                                                                                                                                                                                                                                                                                                                                                                                                                                                                                           |

|                       |                                                                                                                                                                                                                                                                                                                                                                                                                                                                                                                                                                                                                                                                                                                                                                                                                                                                                                                                                                                                                                                                                                                                                                                                                                                                                                                                                                                                                                                                                                                                                                                                                                                                                                                                                                                                                                                                                                                                                                                                                                                                                                                                                                                                                                                                                                                                                                                                                                                                                                                                                                                                                                                                                                                                                                                                                                                                                                                                                                                                                                                                                                                                                                                                      |
|-----------------------|------------------------------------------------------------------------------------------------------------------------------------------------------------------------------------------------------------------------------------------------------------------------------------------------------------------------------------------------------------------------------------------------------------------------------------------------------------------------------------------------------------------------------------------------------------------------------------------------------------------------------------------------------------------------------------------------------------------------------------------------------------------------------------------------------------------------------------------------------------------------------------------------------------------------------------------------------------------------------------------------------------------------------------------------------------------------------------------------------------------------------------------------------------------------------------------------------------------------------------------------------------------------------------------------------------------------------------------------------------------------------------------------------------------------------------------------------------------------------------------------------------------------------------------------------------------------------------------------------------------------------------------------------------------------------------------------------------------------------------------------------------------------------------------------------------------------------------------------------------------------------------------------------------------------------------------------------------------------------------------------------------------------------------------------------------------------------------------------------------------------------------------------------------------------------------------------------------------------------------------------------------------------------------------------------------------------------------------------------------------------------------------------------------------------------------------------------------------------------------------------------------------------------------------------------------------------------------------------------------------------------------------------------------------------------------------------------------------------------------------------------------------------------------------------------------------------------------------------------------------------------------------------------------------------------------------------------------------------------------------------------------------------------------------------------------------------------------------------------------------------------------------------------------------------------------------------------|
|                       | <p>GCTAGACAGGCTTATCTTGGACAAGAAGAAGATCGCTTGGCCTCGCGCGCAGATCAGTTGGAAGA<br/> ATTTGTCCATTACGTAAGGCGAGATCACCAAGGTAGTCGGCAAATAACTGTCAGACCAAGTTTA<br/> CTCATATATACTTTAGATTGATTTAAAACTTCATTTTTAATTTAAAAGGATCTAGGTGAAGATCCTT<br/> TTTGATAATCTCATGACCAAAATCCCTTAACGTGAGTTTTTCGTTCCACTGAGCGTCAGACCCCGTA<br/> GAAAAGATCAAAGGATCTTCTTGAGATCCTTTTTTTCTGCGGTAATCTGCTGCTTGCAAAACAAA<br/> AAACCACCGCTACCAGCGGTGGTTTGTGGCCGATCAAGAGCTACCAACTCTTTTTCCGAAGGTA<br/> ACTGGCTTACAGCAGAGCGCAGATACCAAACTGTCCTTCTAGTGTAGCCGTAGTTAGGCCACCAC<br/> TTCAAGAACTCTGTAGCACCGCTACATACCTCGCTCTGCTAATCCTGTTACCAGTGGCTGCTGCC<br/> AGTGGCGATAAGTCGTGCTTACCAGGTTGGACTCAAGACGATAGTTACCGGATAAGGCGCAGCG<br/> GTCGGGCTGAACGGGGGTTTCGTGCACACAGCCAGCTTGGAGCGAACGACCTACACCGAAGTGA<br/> GATACCTACAGCGTGAGCTATGAGAAAAGCGCCACGCTTCCCGAAGGGAGAAAAGGCGGACAGGTAT<br/> CCGGTAAGCGGCAGGGTCGGAACAGGAGAGCGCACAGGGGAGCTTCCAGGGGAAACGCCTGGT<br/> ATCTTTATAGTCTGTGCGGTTTTCGCCACCTCTGACTTGAGCGTCGATTTTTGTGATGCTCGTCAG<br/> GGGGCGGAGCCTATGGAAAAACGCCAGCAACGCGGCCTTTTACGGTTCCTGGCCTTTTGTCTGG<br/> CCTTTTGCTCACATGTTCTTTCCTGCGTTATCCCCTGATTCTGTGGATAACCGTATTACCGCCTTTG<br/> AGTGAGCTGATACCGCTCGCCGACCCGACCGGACCGGACCGGAGTCAGTGTAGCGAGGAAAGC<br/> GGAAGACGCCAAATACGCAAAACCGCTCTCCCCGCGCTTGGCCGATTCTAATTAACACTGTG<br/> GTCTCAGCTTTTGTCTTCGACGCTGGCAGCAGAGTTTCCCGACTGGAAAAGCGGGCAGTGAGCGC<br/> AACGCAATTAATGTGAGTTAGCTCACTATTAGCCACCCAGGCTTTACACTTTATGCTCCGGCT<br/> CGTATGTTGTGGAATTGTGAGCGGATAACAATTTACACAGGAAACAGCTATGACCATGATTAC<br/> GCCAAGCTTGCATGCCGTCAGGTGACTGACTCTAGAGGATCCCCGGTACCAGTCAATGACTGG<br/> CCGTCGTTTTACAACGTCGTGACTGGGAAAACCTGGCGTTACCCAACCTAATCGCCTTGCAGCAC<br/> ATCCCCCTTTCGCCAGCTGGCGTAATAGCGAAGAGGCCCGCACCGATCGCCCTTCCCAACAGTTG<br/> CGCAGCCTGAATGGCGAATGGCGCCTGATGCGGTATTTTCTCCTTACGCATCTGTGCGGATTTCA<br/> CACCGCATATGGTCACTCTCAGTACAATCTGCTCTGATGCCGCATAGTTAAGCCAGCCCCGACAC<br/> TCGCCAACACCCGCTGACGCGCCCTGACGGGCTTGTCTGCTCCCGGCATCCGCTTACAGACAAGC<br/> TGTGACGAAGACAACAACCTGAGACCACGAA</p>                                                                                                                                                                                                                                                                                                                                                                                                                                                                                                                                                                                                                                                                                                                                                                                                                                                                                                                                                                                                                                                                                                                                                                                                                                                  |
| <p><b>P_polyA</b></p> | <p>GTGGCTCTCAGTGACGAAAGGGCCTCGTGATACGCCTATTTTTATAGGTTAATGTCATGATAAT<br/> AATGGTTCTTAGACGTCAGGTGGCCTTTTCGGGAAATGTGCGGAAACCCCTATTTGTTTATT<br/> TTCTAAATACATTCAAATATGATCCGCTCATGAGACAATAACCCTGATAAATGCTTCAATAATAT<br/> TGAAAAAGGAAGATATGCGCTACGCAACTGGTCCAGAACCCTTGACCGAACCGAGCGGTGGTAA<br/> CGGCGCAGTGGCGGTTTTCATGGCTTGTATGACTGTTTTTTGGGGTACAGCTATGCCTCGGGC<br/> ATCCAAGCAGCAAGCGGTTACGCCGTGGGTGATGTTGATGTTATGGAGCAGCAACGATGTTA<br/> CGCAGCAGGGCAGTCGCCCTAAAACAAAGTTAAACATCATGAGGGAAGCGGTGATCGCCGAAGTA<br/> TCGACTCAACTATCAGAGGTAGTTGGCGTCATCGAGCGCCATCTCGAACCGACGTTGCTGGCCGT<br/> ACATTTGTACGGCTCCGCACTGGATGGCGGCCTGAAGCCACACAGCGATATTGATTGCTGGTTA<br/> CGGTGACCGTAAGGCTTGTGAAACAACCGCGGAGCTTTGATCAACGACCTTTTGAAAACCTTCG<br/> GCTTCCCTGGAGAGAGCGAGATTTCCGCGTATGGAACCTGAGAAAGTACCATTGTTGTGACCGCACAT<br/> CATCCGTGGCGTTATCCAGCTAAGCGCAACTGCAATTTGGAGAATGGCAGCGCAATGACATTC<br/> TTGCAGGTATCTCGAGCCAGCCACGATCGACATTGATCTGGCTATCTTGCTGACAAAAGCAAGAG<br/> AACATAGCGTTGCCTTGGTAGGTCCAGCGCGGAGGAACTCTTTGATCCGGTTCCCTGAACAGGAT<br/> CTATTTGAGCGCTAAATGAAACCTTAACGCTATGGAACCTCGCCGCCGACTGGCTTAGCCGATGA<br/> GCGAAATGTAGTGCTTACGTTGTCCCGCATTGTTGACAGCGCAGTAACCGGCAAAAATCGCGCCGA<br/> AGGATGTCGCTGCCGACTGGGCAATGGAGCGCTGCCGCCAGTATCAGCCCGTCATACTTGAA<br/> GCTAGACAGGCTTATCTTGGACAAGAAGAAGATCGCTTGGCCTCGCGCGCAGATCAGTTGGAAGA<br/> ATTTGTCCATTACGTAAGGCGAGATCACCAAGGTAGTCGGCAAATAACTGTCAGACCAAGTTTA<br/> CTCATATACTTTAGATTGATTTAAAACTTCATTTTTAATTTAAAAGGATCTAGGTGCGGATCCTT<br/> TTTGATAATCTCATGACCAAAATCCCTTAACGTGAGTTTTTCGTTCCACTGAGCGTCAGACCCCGTA<br/> GAAAAGATCAAAGGATCTTCTTGAGATCCTTTTTTTCTGCGCGTAATCTGCTGCTTGCAAAACAAA<br/> AAACCACCGCTACCAGCGGTGGTTTTGTTTGGCGGATCAAGAGCTACCAACTCTTTTTCCGAAGGTA<br/> ACTGGCTTACGACAGCGCAGATACCAAACTATGTCCTTCTAGTGTAGCCGATGGCTTAGGCCACCAC<br/> TTCAAGAACTCTGTAGCACCGCTACATACCTCGCTCTGCTAATCCTGTTACCAGTGGCTGCTGCC<br/> AGTGGCGATAAGTCGTGCTTACCAGGTTGGACTCAAGACGATAGTTACCGGATAAGCGCGCAGCG<br/> GTCGGGCTGAACGGGGGTTTCGTGCACACAGCCAGCTTGGAGCGAACGACCTACACCGAAGTGA<br/> GATACCTACAGCGTGAGCTATGAGAAAAGCGCCACGCTTCCCGAAGGGAGAAAAGGCGGACAGGTAT<br/> CCGGTAAGCGGCAGGGTCGGAACAGGAGAGCGCACAGGGGAGCTTCCAGGGGGAAACGCCTGGT<br/> ATCTTTATAGTCTGTGCGGTTTTCGCCACCTCTGACTTGAGCGTCGATTTTTGTGATGCTCGTCAG<br/> GGGGGCGGAGCCTATGGAAAAACGCCAGCAACCGCGCCTTTTTACGGTTCCTGGCCTTTTGTCTGG<br/> CCTTTTGCTCACATGTTCTTTCCTGCGTTATCCCCTGATTCTGTGGATAACCGTATTACCGCCTTTG<br/> AGTGAGCTGATACCGCTCGCCGACGCCAACGACCGAGCGCAGCGAGTCAGTGAGCGAGGAAGC<br/> GGAAGAGCGCCCAATACGCAAAACCGCTCTCCCCGCGCTTGGCCGATTCTAATCACTCTGTG<br/> GTCTCAAACTGTCTTTCGACGCTGGCAGCAGAGGTTCCCGACTGGAAAAGCGGGCAGTGAGCGC<br/> AACGCAATTAATGTGAGTTAGCTCACTCATTAGGCACCCAGGCTTTACACTTTATGCTTCCGGCT<br/> CGTATGTTGTGGAATTGTGAGCGGATAACAATTTACACAGGAAACAGCTATGACCATGATTAC<br/> GCCAAGCTTGCATGCCTGCAGGTGACTCTAGAGGATCCCCGGTACCAGCTCGAATCACTGG<br/> CCGTCGTTTTACAACGTCGTGACTGGGAAAACCTGGCGTTACCCAACCTAATCGCCTTGCAGCAC<br/> ATCCCCCTTTCGCCAGCTGGCGTAATAGCGAAGAGGCCCGCACCGCATCGCCCTTCCCAACAGTTG<br/> CGCAGCCTGAATGGCGAATGGCGCCTGATGCGGTATTTTTCTCCTTACGCATGATGTCGGATTTCA<br/> CACCGCATATGGTCACTCTCAGTACAATCTGCTCTGATGCCGCATAGTTAAGCCAGCCCCGACAC<br/> TCGCCAACACCCGCTGACGCGCCCTGACGGGCTTGTCTGCTCCCGGCATCCGCTTACAGACAAGC<br/> TGTGACGAAGACAACGCTTGGACCACGAA</p> |
| <p><b>pTU-1</b></p>   | <p>TCTGTGAAGACAATGCCGAATTCGGATCCGGAGTGAGACCGCAGCTGGCAGCAGAGTTTGGCGA<br/> CTGGAAAGCGGGCAGTGAGCGCAACGCAATTAATGTGAGTTAGCTCACTCATTAGGCACCCACAG<br/> CTTTACACTTTATGCTTCCGGCTCGTATGTTGTGTGGAATTGTGAGCGGATAACAATTTACACAG<br/> GAAACAGCTATGACCATGATTACGCCAAGCTTTCATGCTGTCAGGTGACTCTAGAGGATCCCCG<br/> GGTACCAGCTCGAATTCAGTGGCCGCTGTTTTACAACGTCGTGACTGGGAAAACCTGGCGTTA<br/> CCCAACTTAATCGCCTTACAGCACATCCCCCTTTCGCCAGCTGGCGTAATAGCGAAGAGGGCCGC<br/> ACCGATCGCCCTTCCCAACAGTTGCGCAGCCTGAATGGCGAATGGCGCCTGATGCGGATTTTTCT</p>                                                                                                                                                                                                                                                                                                                                                                                                                                                                                                                                                                                                                                                                                                                                                                                                                                                                                                                                                                                                                                                                                                                                                                                                                                                                                                                                                                                                                                                                                                                                                                                                                                                                                                                                                                                                                                                                                                                                                                                                                                                                                                                                                                                                                                                                                                                                                                                                                                                                                                                                                                                                                                                                                       |

|       |                                                                                                                                                                                                                                                                                                                                                                                                                                                                                                                                                                                                                                                                                                                                                                                                                                                                                                                                                                                                                                                                                                                                                                                                                                                                                                                                                                                                                                                                                                                                                                                                                                                                                                                                                                                                                                                                                                                                                                                                                                                                                                                                                                                                                                                                                                                                                                                                                                                                                                                                                                                                                                                                                                                                                                                                                                                                                                                                                                                                                                                                                                                                                                                                                                                                                                                                                                                                                                                                                                                                                                                                                                                                                                                                                                                                                                                                                                                                                                                                                                                                                                                                                                                                                                                                                                                                                                                                                                                                                                                                                                                                                                                                                                                                                                                                                                                                                                                                                                                                                                   |
|-------|-----------------------------------------------------------------------------------------------------------------------------------------------------------------------------------------------------------------------------------------------------------------------------------------------------------------------------------------------------------------------------------------------------------------------------------------------------------------------------------------------------------------------------------------------------------------------------------------------------------------------------------------------------------------------------------------------------------------------------------------------------------------------------------------------------------------------------------------------------------------------------------------------------------------------------------------------------------------------------------------------------------------------------------------------------------------------------------------------------------------------------------------------------------------------------------------------------------------------------------------------------------------------------------------------------------------------------------------------------------------------------------------------------------------------------------------------------------------------------------------------------------------------------------------------------------------------------------------------------------------------------------------------------------------------------------------------------------------------------------------------------------------------------------------------------------------------------------------------------------------------------------------------------------------------------------------------------------------------------------------------------------------------------------------------------------------------------------------------------------------------------------------------------------------------------------------------------------------------------------------------------------------------------------------------------------------------------------------------------------------------------------------------------------------------------------------------------------------------------------------------------------------------------------------------------------------------------------------------------------------------------------------------------------------------------------------------------------------------------------------------------------------------------------------------------------------------------------------------------------------------------------------------------------------------------------------------------------------------------------------------------------------------------------------------------------------------------------------------------------------------------------------------------------------------------------------------------------------------------------------------------------------------------------------------------------------------------------------------------------------------------------------------------------------------------------------------------------------------------------------------------------------------------------------------------------------------------------------------------------------------------------------------------------------------------------------------------------------------------------------------------------------------------------------------------------------------------------------------------------------------------------------------------------------------------------------------------------------------------------------------------------------------------------------------------------------------------------------------------------------------------------------------------------------------------------------------------------------------------------------------------------------------------------------------------------------------------------------------------------------------------------------------------------------------------------------------------------------------------------------------------------------------------------------------------------------------------------------------------------------------------------------------------------------------------------------------------------------------------------------------------------------------------------------------------------------------------------------------------------------------------------------------------------------------------------------------------------------------------------------------------------------------------------|
|       | <p>CCTTACGCATCTGTGCGGTATTTACACCCGCATATGGTGCACCTCTCAGTACAATCTGCTCTGATGC<br/> CGCATAGTTAAGCCAGCCCCGACACCCGCCAACACCCCGCTGACGCGCCCTGACGGGCTTGTCTGC<br/> TCCCAGCATCCGCTTACAGACAAGCTGTGACGGTCTCACGCTGCAATGTCTTTGACGAAATG<br/> GTTTTAACTATCAGTGTGGTACAGGATATATTTGCGGGTAAACCTAAGGCTTTAAAGAGCGT<br/> GAATAATCGGATATTTAAAAGGGCGTGAAAAGGTTTATCCGTTCTGTCATTTGTATGTGCATGCCA<br/> ACCACAGGGTTCCCAGATCAGGCGCTGGCTGCTGAACCCCCAGCCGGAAGTACCCCCACAAGGC<br/> CCTAGCGTTTGAATGCACCAGGTCATATTGACCCAGGCGTGTCCACCAGGCGCTGCCTCGC<br/> AACTCTTCGACGGCTTCGCCGACCTGCTCGGCCACTTCTTACGCGGGTGAATCCGATCCGCA<br/> CATGAGGCGGAAGGTTTCCAGCTTGAGCGGGTACGGCTCCCAGTGCAGCTGAAAATAGTCAACA<br/> TCCGTGCGGGCCGTGCGCGACAGCTTGGCTACTTCTCCATATGAATTCGTGTAGTGGTCCGCA<br/> GCAAACAGCAGCAGGATTTCTCGTCGATCAGGACCTGGCAACGGGACGTTTTCTTGCACGGTC<br/> CAGGACGCGGAAGCGGTGCAGCAGCAGCACCATTCCAGGTGCCAACGCGGTGCGACGTGAAG<br/> CCCATCGCCGTGCGCTGTAGGCGCGACAGGCATTCTCGGCCTTCGTGTAATACCGGCCATTGAT<br/> CGACCAGCCCAGGTCCTGGCAAAGCTCGTAGAACGTGAAGGTGATCGGCTCGCCGATAGGGGTGC<br/> GCTTCGCGTACTCCAACACCTGCTGCCACACCAGTTCGTCATCGTCGGCCCCGACGCTCGACGCCG<br/> GTGTAGGTGATCTCAGTCTTGTGACGTGGAAAATGACCTGTGTTTGCAGCCTCGCGCGG<br/> GATTTCTTGTGCGCGTGGTGAACAGGGCAGAGCGGGCCGTGTCGTTTTCAGCATCGCTCGCATCG<br/> TGTCGGGCCACGGCGCAATATCGAACAAAGGAAAGCTGCATTTCTTGTATCTGCTGCTTCTGTGTT<br/> TCAGCAACGCGGCCCTGCTTGGCCTCGCTGACCTGTTTTGCCAGGTCCTCGCCGCGGTTTTCTCGT<br/> TCTTGGTCGTCATAGTCTCTCGCGTGTGATGGTCATCGACTTCGCCAAACCTGCCGCCTCTGT<br/> CAAGACGACGCGAACCGTCCACGGCGGCCGATTTCGCGCGGGCAGGGCAGGGTGGTGGTGTCCAC<br/> GCTGTGCGGCTCGATCTTGGCCGTAGCTTGTGACCATCGAGCCGACGGACTGGAAGGTTTCGC<br/> GGGGCGCACGCATGACGGTGCGGCTTGGCATGGTTTCGGCATCCTCGCGGAAAAACCCCGCTC<br/> GATCAGTCTTGCCTGTATGCCTTCCGGTCAAACGTCCGATTCAATCACCTCTTGGGGATTGCG<br/> CCCAGCTACGCGGGGCAATGTGCCCTTATTCTGATTGACCCGCTGTTGTTGCGGCTGTTGTTCC<br/> GATAATCCACCTTATCGGCAATGAAGTCGGTCCCGTAGACCGTCTGGCCGTCTTCTCGTACTTGG<br/> TATTCGAATCTTGCCTGCACGAATACCAGCGACCCCTTGCCCAAATACTTGGCGTGGGCTCGG<br/> CCTGAGAGCCAAAACACTTGATGCGGAAGAAAGTGGTGCCTCTGCTTGTGCGCCGATCGTTG<br/> CGCCACTTAGGATCTGCCAGGAACCGTAAAGAGCCGCGTGTGCTGGCTTTCCTCCACTC<br/> CGCCCCCTGACGAGCATCAAAAAATCGACGCTCAAGTCAGAGGTGGCGAAACCCGACAGGACT<br/> ATAAAGATAACAGGCGTTTCCCCCTGGAAGCTCCCTCGTGCCTCTCTGTTCCGACCCCTGCCGCT<br/> TACCGGATACCTGTCCGCTTTCTCCCTTCGGGAAGCGTGGCGCTTCTCATAGCTCACGCTGTAG<br/> GTATCTCAGTTCGGTGTAGGTGCTTCCGCTCAAGCTGGGCTGTGTGCACGAAACCCCGTTACG<br/> CCGACCGCTGCGCCTTATCCGGTAACTATCGTCTTGTAGTCCAAACCCGTTAAGACACCCGATCGC<br/> CACTGGCAGCAGCCACTGGTAACAGGATTAGCAGAGCGAGGTATGTAGGCGGTGTACAGAGTTC<br/> TTGAAGTGGTGGCCTAACTACGGCTACACTAGAAGGACAGTATTTGGTATCTGCGCTCTGCTGAA<br/> GCCAGTTACCTTCGGA AAAAGAGTTGGTAGCTCTTGTATCCGGCAAACAAACCCCGTGGTAGCG<br/> GTGGTTTTTTGTTTGAAGCAGCAGATTACGCGCAGAAAAAAGGATCTGGAAGAGATCCTTTGA<br/> TCTTTTCTACGGGGTCTGACGCTCAGTGAACGAAAACCTCACGTTAAGGGATTTTGGTTCATGAGAT<br/> TATCAAAAAGGATCTTACCTAGATCCTTTTAAATTA AAAATGAAGTTTAAATCAATCTAAAGTAT<br/> ATATGAGTAAAATTTGGTCTGACAGTTACCAATGCTTAATCAGTGAGGCACCTATCTCAGCGATCTG<br/> TCTATTTGCTTTCATAGCTTGGCTGACTCCCCGCTGTGTAGATAACTAGATACGGGAGGGCTT<br/> ACCATCTGGCCCCAGTGCTGCAATGATAACCGGAGAACCCGCTCACCGGCTCCAGATTTATCAG<br/> CAATAAACAGCCAGCCGGAAGGGCCGAGCGCAGAAGTGGTCTGCAACTTTATCCGCTCCATC<br/> CAGTCTATTAATTTGTTGCCGGGAAGCTAGAGTAAGTATTGCCAGTTAATAGTTTGGCAACCGTT<br/> GTTGCCATTGTACAGGCATCGTGGTGTACGCTCGTCTGTTGGTATGGTTCATTAGCTCCCGGT<br/> TCCCAACGATCAAGGCGAGTTACATGATCCCCATGTTGTGCAAAAAAGCGGTTAGCTCCTTCGGT<br/> CCTCCGATCGTTGTCAGAAGTAAGTTGGCCGCAAGTGTATCACTCATGGTTATGGCAGCACTGCAT<br/> AATCTCTTACTGTATGCCATCCGTAAGTGTCTTTCTGTGACTGGTGTACTCAACCAAGTCA<br/> TTCTGAGAATAGTGTATGCGGCGACCGAGTTGCTCTTGGCCGGCTCAATACGGGATAATAACCG<br/> GCCACATAGCAGAACTTAAAAAGTGTCTATCATTTGGA AAAACGTTCTTCCGGGGAAAACTCTCAAG<br/> GATCTTACCCTGTTGAGATCCAGTTCGATGTAACCCACTCGTGCACCCAACTGATCTTACGCATC<br/> TTTTACTTTACCAGCGTTTCTGGGTGAGCAAAAACAGGAAGGCAAAATGCCGAAAAAAGGGAA<br/> TAAGGGCGACACGGAATGTTGAATACTATACTTCCCTTTTCAATATTTATGAAGCATTTATCA<br/> GGTATTTGTCTCATGAGCGGATACATATTTGAATGTAATTTAGAAAAATAAACAAATAGGGTTCC<br/> GCGCACGAATTTGGCCAGCGCTGCCATTTTTGGGGTGAAGCCGTTCCGCGCCGAGGGGGCGAGCC<br/> CCTGGGGGGATGGGAGGCCCGCTTAGCGGGCCGGGAGGGTTCGAGAAGGGGGGGCACCCCT<br/> TCGGCGTGC GCGGTACGCGCACAGGGCGCAGCCCTGGTTAAAAACAAGGTTATAAATATTGGT<br/> TAAAAAGCAGGTTAAAAAGACAGGTTAGCGGTGGCCGAAAAACGGGCGGAACTTGA CAATGCT<br/> GGATTTTCTGCCTGTGGACAGCCCTCAAATGTCAATAGGTGCGCCCTCATCTGTGACACTCTG<br/> CCCCTCAAGTGTCAAGGATCGCGCCCTCATCTGTGACTAGTGCAGCCCTCAAGTGTCAATACCG<br/> CAGGGCACTTATCCCAGGCTTGTCCACATCATCTGTGGGAAACTCGCGTAAAACTCAGGCGTTTT<br/> GCCATTTGCGAGGCTGGCCAGCTCCAGCTCGCCGGCGAAATCGAGCTGCCCTCATCTGTCA<br/> ACGCGCGCGCGGGTGTGTCGGCCCTCAAGTGTCAACGTCGCCCCCTCATCTGTGACTGAGGGCC<br/> AAGTTTTCCGCGAGGTATCCACAACGCGGGCGGGCGGGTGTCTCGCACACGGCTTCGACGGCGT<br/> TTCTGGCGCGTTTGCAGGGCCATAGACGGCCGCCAGCCAGCGGCGAGGGCAACCAAGCCGGT<br/> AGCGTCCGAAAGGAGATCTGATCTGACTGATGGGCTGCCTGTATCGAGTGGTGAATTTGTGCGG<br/> AGCTGCCGGTCCGGGAGCTGTTGGTGGCTGGTGGCAGGATATATTGTTGTTAAACA AATTGAC<br/> GCTTAGACA ACTTAATAACACATTGCGGACGTTTTTAATGTA CTGGGGTGGATGCAGTGGGCCCCA<br/> C</p> |
| pTU-2 | <p>TCTGTGAAGACAAGCAAGAATTC AAGCTTGGAGTGAGACCGCAGCTGGCACCAGCAGGTTTGCCGA<br/> CTGGAAGCGGGCAGTGAGCGCAACGCAATTAATGTGAGTTAGCTCACTATTAGGCACCCAGG<br/> CTTTACACTTTATGCTTCCGGCTCGTATGTTGTGTGGAATTTGAGCGGATAACAATTTACACAG<br/> GAAACAGCTATGACCATGATTACGCCAAGCTTGCATGCCTGCAGGTGCAGCTTAGAGGATCCCCG<br/> GGTACCAGCTCGAATTCAGTGGCCGTCTTTTACAACGTCGTGACTGGAAAAACCTGGCGTTA<br/> CCCAACTTAATCGCCTTGCAGCACATCCCTTTCCGCCAGCTGGCGTAATAGCGAAGAGGCCCGC<br/> ACCGATCGCCCTTCCCAACAGTTGCGCAGCCTGAATGGCGAATGGCGCTGATGCGGTATTTTCT<br/> CCTTACGCATCTGTGCGGTATTTACACCCGCATATGGTGCACCTCTCAGTACAATCTGCTCTGATGC</p>                                                                                                                                                                                                                                                                                                                                                                                                                                                                                                                                                                                                                                                                                                                                                                                                                                                                                                                                                                                                                                                                                                                                                                                                                                                                                                                                                                                                                                                                                                                                                                                                                                                                                                                                                                                                                                                                                                                                                                                                                                                                                                                                                                                                                                                                                                                                                                                                                                                                                                                                                                                                                                                                                                                                                                                                                                                                                                                                                                                                                                                                                                                                                                                                                                                                                                                                                                                                                                                                                                                                                                                                                                                                                                                                                                                                                                                                                                                                                                                                                                                                                                                                                                                                                                                                                                                                                                                                                                              |

|       |                                                                                                                                                                                                                                                                                                                                                                                                                                                                                                                                                                                                                                                                                                                                                                                                                                                                                                                                                                                                                                                                                                                                                                                                                                                                                                                                                                                                                                                                                                                                                                                                                                                                                                                                                                                                                                                                                                                                                                                                                                                                                                                                                                                                                                                                                                                                                                                                                                                                                                                                                                                                                                                                                                                                                                                                                                                                                                                                                                                                                                                                                                                                                                                                                                                                                                                                                                                                                                                                                                                                                                                                                                                                                                                                                                                                                                                                                                                                                                                                                                                                                                                                                                                                                                                                                                                                                                                                                                                                                                                                                                                                                                                                                                                                                                                                                                                                                                          |
|-------|----------------------------------------------------------------------------------------------------------------------------------------------------------------------------------------------------------------------------------------------------------------------------------------------------------------------------------------------------------------------------------------------------------------------------------------------------------------------------------------------------------------------------------------------------------------------------------------------------------------------------------------------------------------------------------------------------------------------------------------------------------------------------------------------------------------------------------------------------------------------------------------------------------------------------------------------------------------------------------------------------------------------------------------------------------------------------------------------------------------------------------------------------------------------------------------------------------------------------------------------------------------------------------------------------------------------------------------------------------------------------------------------------------------------------------------------------------------------------------------------------------------------------------------------------------------------------------------------------------------------------------------------------------------------------------------------------------------------------------------------------------------------------------------------------------------------------------------------------------------------------------------------------------------------------------------------------------------------------------------------------------------------------------------------------------------------------------------------------------------------------------------------------------------------------------------------------------------------------------------------------------------------------------------------------------------------------------------------------------------------------------------------------------------------------------------------------------------------------------------------------------------------------------------------------------------------------------------------------------------------------------------------------------------------------------------------------------------------------------------------------------------------------------------------------------------------------------------------------------------------------------------------------------------------------------------------------------------------------------------------------------------------------------------------------------------------------------------------------------------------------------------------------------------------------------------------------------------------------------------------------------------------------------------------------------------------------------------------------------------------------------------------------------------------------------------------------------------------------------------------------------------------------------------------------------------------------------------------------------------------------------------------------------------------------------------------------------------------------------------------------------------------------------------------------------------------------------------------------------------------------------------------------------------------------------------------------------------------------------------------------------------------------------------------------------------------------------------------------------------------------------------------------------------------------------------------------------------------------------------------------------------------------------------------------------------------------------------------------------------------------------------------------------------------------------------------------------------------------------------------------------------------------------------------------------------------------------------------------------------------------------------------------------------------------------------------------------------------------------------------------------------------------------------------------------------------------------------------------------------------------------------------------------|
|       | <p>CGCATAGTTAAGCCAGCCCGACACCCGCCAACACCCCGCTGACGCGCCCTGACGGGCTTGTCTGC<br/> TCCCAGCATCCGCTTACAGACAAGCTGTGACGGTCTCACGCTACTATTGTCTTCTGCACGAAGTGG<br/> TTTAAACTATCAGTGTGACAGGATATATTGGCGGGTAAACCTAAGAGAAAAGAGCGTTTATTAG<br/> AATAACTGATATTTAAAAGGGCGTGAAAAGGTTTATCCGTTTCGTCCTTACGATGTCGCA<br/> CCACAGGGTTCAGATCAGGCGCTGGCTGCTGAACCCCGAGCCGGAACCTGACCCCAACAGGCC<br/> CTAGCGTTTGCATGCACAGGTCATCATTGACCCAGGCGTGTCCACCAGGCCGCTGCCTCGCA<br/> ACTCTTCGACGGCTTCGCCGACCTGCTCGCGCCACTTCTTACGCGGGTGAATCCGATCCGCAC<br/> ATGAGGCGGAAGGTTTCCAGCTTGAGCGGGTACGGCTCCCGGTGCGAGCTGAAATAGTCGAACAT<br/> CCGTCGGGCGCTCGGGACAGCTTGCGGTAATTTCTCCATATGAATTCGTGTAGTGGTCCAG<br/> CAAACAGCAGCAGATTTCCTCGTCGATCAGGACCTGGCAACGGGACGTTTTCTTGCCACGGTCC<br/> AGGACGCGGAAGCGGTGCAGCAGCGACACCGATTCCAGGTGCCAACCGGGTCCGACGTGAAGC<br/> CCATCGCCGTCGCTTGAGCGCGACAGGCATTCTCGGCCTTCGTGTAATACCGGCCATTGATC<br/> GACCAGCCAGGTCCTGGCAAAGCTCGTAGAACGTGAAGGTGATCGGCTCGCCGATAGGGGTGC<br/> GCTTCGCGTACTCCAACACCTGCTGCCACACCAGTTCGTATCGTCGGCCCGAGCTCGACGCCG<br/> GTGTAGGTGATCTCACGTCCTTGTGACGTGGAATAATGACCTGTTTTGACGCGCCTCGCGCGG<br/> GATTTCTTGTGCGCGTGGTGAACAGGGCAGAGCGGGCCGCTGCTTTGGCATCGCTCGCATCG<br/> TGTCGGCCACGGCGCAATATCGAAACAAGGAAAGCTGACATTTCTTGTATGCTGCTCGTGTGTT<br/> TCAGCAACGGCCCTGCTTGGCTCGCTGACCTGTTTTGCCAGGTCCTCGCCGGCGGTTTTTCGCT<br/> TCTTGGTCGTCATAGTTCCTCGCGTGTGATGGTATCGACTTCGCCAACCTGCCGCTCCTGTT<br/> CAAGACGACGCGAACGCTCCACGGCGGCCGATGGCGGGCAGGGCAGGGGAGCCAGTTGCAC<br/> GCTGTCGCGCTCGATCTTGGCCGTAGCTTGTGACCATCGAGCCGACGCTGGAAGTTTCGCG<br/> GGGGCGCACGATGACGGTGGGCTTGGCATGGTTTCGGCATCCTCGGGGAAAAACCCCGCTC<br/> GATCAGTTCCTGCTGTATGCCTTCCGGTCAAACGTCGGATTCAATCACCCCTCCTGCGGGATTGC<br/> CCCAGTACGCGGGGCAATGTGCCCTTATTCCTGATTTGACCCGCTGGTGCCTGGTGTCCA<br/> GATAATCCACCTTATCGGCAATGAAGTCGGTCCCGTAGACCGTTCGGCGTCTGCGTCTGCTGG<br/> TATTCCGAATCTTGCCTGCACGAATACCAGCGACCCCTTGCCCAAATACTTGGCGTGGGCTCGG<br/> CCTGAGAGCCAAACACTTGATGCGGAAGAAGTCGGTGGCTCCTGCTTGTGCGCGGCATCGTTG<br/> CGCCACATCTAGGATCTGCCAGGAACCGTAAAAAGGCCGCGTGTGGCGTTTTTCCATAGGTC<br/> CGCCCCCTGACGAGCATCAAAAAATCGACGCTCAAGTCAGAGGTGGGAAACCCAGCAGGACT<br/> ATAAAGATAACAGGCGTTTCCCTGGAAGCTCCCTCGTGGCTCCTGTTCCGACCTGCCGCT<br/> TACCGGATACCTGTCGCTTCTCCCTTCGGGAAGCGTGGCGCTTCTCATAGCTCACGCTGTAG<br/> GTATCTCAGTTCGGTGTAGGTCGTTCCGCTCAAGCTGGGCTGTGTGCAGAACCCCGCTTACG<br/> CCGACCGTGGCCTTATCCGGTAACTATCGCTTGTAGTCCAACCCGGTAAGACAGCATCTATCCG<br/> CACTGGCAGCAGCCACTGGTAACAGGATAGCAGAGCGAGGTATGTAGGCGGTGCTACAGAGTTC<br/> TTGAAGTGGTGGCCTAACTACGGCTACACTAGAAGGACAGTATTTGGTATCTGCGCTCTGCTGAA<br/> GCCAGTTACCTCGGAAAAAGAGTTGGTAGCTTGTATCCGGCAAACAACCCAGCTGGTAGCG<br/> GTGGTTTTTTGTTTGAAGCAGCAGATTACGGCAGAAAAAAGGATCTCAAGAAGATCCTTTGA<br/> TCTTTCTACGGGCTGACGCTCAGTGGAAACGAAAACTCACGTTAAGGATTTTGGTCAATGAGAT<br/> TATCAAAAAAGGATCTTACCTAGATCCTTTTAAATTAATAAATGAAGTTTTAAATCAATCTAAAGTAT<br/> ATATGAGTAAACTTGGTCTGACAGTTACCAATGCTTAATCAGTGAGGCACCTATCTCAGCGATCTG<br/> TCTATTTCTGTTTATCCATAGTTGCCGACTCCCGCTGCTGTAGATAACTACGATACGGGAGGGCTT<br/> ACCATCTGGCCCAAGTGTGCAATGATACCCGAGAGAACCGCTCACCGGCTCCAGATTTATCGC<br/> CAATAAACAGCCAGCCGGAAGGGCCGAGCGCAGAAGTGGTCTGCAACTTTATCCGCTCCATC<br/> CAGTCTATAATTGTTGCCGGGAAGCTAGAGTAAGTAGTTCGCCAGTTAATAGTTTGGCAACGTT<br/> GTTGCCATTGCTACAGGCATCGTGGTGTACGCTCGTCTGTTGGTATGGCTTCATTAGCTCCGGT<br/> TCCCAAGATCAAGGCGAGTTACATGATCCCCATGTTGTGCAAAAAAGCGGTTAGCTCCTCCGTT<br/> CCTCCGATCGTTGTGAGAAAGTAAAGTTGGCCGAGTGTATCACTCATGGTATGCGCAGCACTGCAT<br/> AATTCTTACTGTATGCCATCCGTAAGATGCTTTTCTGTGACTGGTGTACTCAACCAAGTCA<br/> TTCTGAGATAAGTGTATGCGCGACCGAGTTGCTTTCGCCGGCGTCAATACGGGATAATACCCG<br/> GCCACATAGCAGAACTTAAAAAGTGTCTCATCTTGGAAACGTTCTTCGGGGGCAAAAACCTCAAG<br/> GATCTTACCGCTGTGAGATCCAGTTCAGTGAATCAACCCACTCGTGCAACCACTGATCTTACGCATC<br/> TTTTACTTTACCAGCGTTTCTGGGTGAGCAAAAACAGGAAGGCAAAAATGCCGAAAAAAGGGAA<br/> TAAGGGCGACACGAAATGTTGAATACTCATACTCTCCTTTTTCAATATTATGAAGCATTTATCA<br/> GGGTTATTGTCTCATGAGCGGATACATATTTGAATGTATTTAGAAAAATAACAAATAGGGGTTCC<br/> CGCACGAAATTTGGCCAGCGCTGCCATTTTTGGGTTGAGGCCGTTCCGCGGAGGGGCGCAGCC<br/> CCTGGGGGGATGGGAGGCCCGCTTAGCGGGCCGGGAGGGTTCGAGAAGGGGGGGCACCCCT<br/> TCGGCGTGCAGCGTACGCGCACAGGGCGCAGCCCTGGTAAAAACAAGGTTTATAAATATTGGT<br/> TTAAAAGCAGGTTAAAAAGCAGGTTAGCGGTGGCCGAAAAACGGGCGGAAACCTTGCAAATGCT<br/> GGATTTCTGCCTGTGGACAGCCCTCAAATGTCAATAGGTGCGCCCTCATCTGTGACACTGTG<br/> CCCCTCAAGTGTCAAGGATCGCGCCCTCATCTGTGAGTGTGCGGCCCTCAAGTGTCAATACCG<br/> CAGGGCACTTATCCCAAGGCTTGTCCACATCATCTGTGGGAACTCGCGTAAAAATCAGGCGTTTT<br/> GCCGATTTGCGAGGCTGGCCAGCTCCACGTCGCGGGCCGAAATCGAGCCTGCCCTCATCTGTCA<br/> ACGCCCGCCGGTGTGAGTGGCCCTCAAGTGTCAACGTCGCCCCCTCATCTGTGAGTGGGCGC<br/> AAGTTTTCCGCGAGGTATCCACAACCGCGCGGCTGCTCGCACACGGGCTTCGACGGCGT<br/> TTCTGGCGCTTTGCAGGGCCATAGACGGCCGCCAGCCAGCGGGCAGGGCAACCCAGCCGGT<br/> AGCGTCCGAAAGGAGATCCTGATCTGACTGATGGGCTGCCTGTATCGAGTGGTATTGTTGGC<br/> AGCTGCCGTCGGGGAGCTGTTGGCTGGCTGGTGGCAGGATATATTGTTGTAAACAATTTGAC<br/> GCTTAGACAACCTAATAACACATTGGCGACGTTTTTAAATGTAAGTGGGTTGGATGCAAGTGGGCCCA<br/> C</p> |
| pTU-3 | <p>TCTGTGAAGACAACTAGAATTGAGCTCGGAGTGAGACCGCAGCTGGCAGCAGAGGTTTGGCGA<br/> CTGGAAAGCGGGCAGTGAGCGCAACGCAATTAATGTGAGTTAGCTCACTATTAGGCCACCCAGG<br/> CTTACACTTTATGCTTCCGGCTCGTATGTTGTGGAAATTGTGAGCGGATAACAATTTACACAG<br/> GAAACAGCTATGACCATGATTACGCCAAGCTTGCATGCCTGCAGGTGACTCTAGAGGATCCCG<br/> GGTACCGAGCTCGAATCACTGGCCGCTGTTTTACAACGTCGTGACTGGGAAAAACCTGGCGTTA<br/> CCCAACTTAATCGCCTTGCAGCACATCCCCCTTTCGCCAGCTGGCGTAATAGCGAAGAGGGCCGC<br/> ACCGTCCCTTCCCAACAGTTGCGCAGCTTGAATGGCGAATGGCGCCTGATGCGGTTTCT<br/> CCTTACGCATCTGTGCGGTTTTCACACCGCATATGGTGCACCTCTCAGTACAATCTGCTCTGATGC<br/> CGCATAGTTAAGCCAGCCCGACACCCGCCAACACCCCGCTGACGCGCCCTGACGGGCTTGTCTGC</p>                                                                                                                                                                                                                                                                                                                                                                                                                                                                                                                                                                                                                                                                                                                                                                                                                                                                                                                                                                                                                                                                                                                                                                                                                                                                                                                                                                                                                                                                                                                                                                                                                                                                                                                                                                                                                                                                                                                                                                                                                                                                                                                                                                                                                                                                                                                                                                                                                                                                                                                                                                                                                                                                                                                                                                                                                                                                                                                                                                                                                                                                                                                                                                                                                                                                                                                                                                                                                                                                                                                                                                                                                                                                                                                                                                                                                                                                                                                                                                                                                                                                                                                                                                                                                                                      |

|              |                                                                                                                                                                                                                                                                                                                                                                                                                                                                                                                                                                                                                                                                                                                                                                                                                                                                                                                                                                                                                                                                                                                                                                                                                                                                                                                                                                                                                                                                                                                                                                                                                                                                                                                                                                                                                                                                                                                                                                                                                                                                                                                                                                                                                                                                                                                                                                                                                                                                                                                                                                                                                                                                                                                                                                                                                                                                                                                                                                                                                                                                                                                                                                                                                                                                                                                                                                                                                                                                                                                                                                                                                                                                                                                                                                                                                                                                                                                                                                                                                                                                                                                                                                                                                                                                                                                                                                                                                                                                                                                                                                                                                                                                                                                                                                                                                                                                                                 |
|--------------|-------------------------------------------------------------------------------------------------------------------------------------------------------------------------------------------------------------------------------------------------------------------------------------------------------------------------------------------------------------------------------------------------------------------------------------------------------------------------------------------------------------------------------------------------------------------------------------------------------------------------------------------------------------------------------------------------------------------------------------------------------------------------------------------------------------------------------------------------------------------------------------------------------------------------------------------------------------------------------------------------------------------------------------------------------------------------------------------------------------------------------------------------------------------------------------------------------------------------------------------------------------------------------------------------------------------------------------------------------------------------------------------------------------------------------------------------------------------------------------------------------------------------------------------------------------------------------------------------------------------------------------------------------------------------------------------------------------------------------------------------------------------------------------------------------------------------------------------------------------------------------------------------------------------------------------------------------------------------------------------------------------------------------------------------------------------------------------------------------------------------------------------------------------------------------------------------------------------------------------------------------------------------------------------------------------------------------------------------------------------------------------------------------------------------------------------------------------------------------------------------------------------------------------------------------------------------------------------------------------------------------------------------------------------------------------------------------------------------------------------------------------------------------------------------------------------------------------------------------------------------------------------------------------------------------------------------------------------------------------------------------------------------------------------------------------------------------------------------------------------------------------------------------------------------------------------------------------------------------------------------------------------------------------------------------------------------------------------------------------------------------------------------------------------------------------------------------------------------------------------------------------------------------------------------------------------------------------------------------------------------------------------------------------------------------------------------------------------------------------------------------------------------------------------------------------------------------------------------------------------------------------------------------------------------------------------------------------------------------------------------------------------------------------------------------------------------------------------------------------------------------------------------------------------------------------------------------------------------------------------------------------------------------------------------------------------------------------------------------------------------------------------------------------------------------------------------------------------------------------------------------------------------------------------------------------------------------------------------------------------------------------------------------------------------------------------------------------------------------------------------------------------------------------------------------------------------------------------------------------------------------------------------|
|              | <p>TCCCCGCATCCGCTTACAGACAAGCTGTGACGGTCTCACGCTTACTTGTCTTCTGCACGAAGTGG<br/> TTAAACTATCAGTGTGTTGACAGGATATATGGCGGGTAAACCTAAGAGAAAAAGAGCGTTTATTAG<br/> AATAATCGGATATTTAAAAGGGCGTGAAAAGGTTTATCCGTTTCGTCATTTGTATGTGCATGCCAA<br/> CCACAGGGTTCCCCAGATCAGGCGCTGGCTGAAACCCAGCCGGAACCCAGCCGACCCCAAGGCC<br/> CTAGCGTTTGAATGCACCAGGTCATCATTGACCCAGGCGTGTCCACCAGGCCGCTGCCTCGCA<br/> ACTCTTCGAGGCTTCGCCCAGCTGCTCGCGCCACTTCTTACCGGGTGGAAATCCGATCCGAC<br/> ATGAGGCGGAAGGTTTCCAGCTTGTAGCGGGTACGGCTCCCGGTGCGAGCTGAAATAGTCAACAT<br/> CCGTCGGGCCGTCGGCGACAGCTTGGCGTACTTCTCCATATGAATTCGTGTAGTGGTCGCCAG<br/> CAAACAGCACGACGATTTCTCGTCGATCAGGACCTGGCAACGGGACGTTTTCTTGCCACGGTCC<br/> AGGACGCGGAAGCGGTGCAGCAGCGACACCGATTCCAGGTGCCAACCGGGTCCGACGTGAAGC<br/> CCATCGCCGTCGCTGTAGGCGCGACAGGCATTCTCGGCCCTTCGTGTAATACCGGCCATTGATC<br/> GACCAGCCCAGGTCCTGGCAAAGCTCGTAGAACCTGGAAGGTGATCGGCTCGCCGATAGGGGTGC<br/> GCTTCGCGTACTCCAACACCTGCTGCCACACCAGTTCTGTCATCGTCGGCCCGCAGCTCGACGCCG<br/> GTGTAGGTGATCTCAGCTCCTTGTGACGTGGAAAATGACCTTGTTTTGACGCGCCTCGCGCGG<br/> GATTTCTTGTGTGCGCGTGGTGAACAGGGCAGAGCGGGCCGTGTCTGTTTGGCATCGCTCGCATCG<br/> TGTCGGCCACGGCGCAATATCGAACAGGAAAGTGCATTTCCCTGATCTGTCTGCTGCTGTGTGT<br/> TCAGAACGCGGCCCTGCTTGGCCTCGCTGACCTGCTTTTGGCAGGTCCTCGCCGCGGTTTTCGCT<br/> TCTTGGTCGTCATAGTTCCTCGCGTGTGATGGTTCATCGACTTCGCCAAACCTGCCGCCTCCTGTT<br/> CAAGACGACGCGAACGCTCCACGGCGGCCGATGGCGCGGGCAGGGCAGGGGGAGCCAGTTGCAC<br/> GCTGTCCGCTCGATCTTGGCCGTAGCTTGTGTGGACCATCGAGCCGACGGATGGAAGGTTTCGCG<br/> GGGCGCACGCATGACGGTGGCGCTTGGCATGGTTTCGGCATCCTCGCGGAAAAACCCCGCTC<br/> GATCAGTCTTGCCTGTATGCCTTCCGGTCAAACGTCGATTATTACCCCTCCTTGCGGGATTGC<br/> CCCGACTCACGCCGGGCAATGTGCCCTTATTCTGATTTGACCCGCTGGTGCCTTGGTGTCCA<br/> GATAATCCACCTTATCGGCAATGAAGTCGGTCCCGTAGACCGTTCGGCCGCTTCTGCTACTTGG<br/> TATTCGGAATCTTGCCTGACGAATACAGCCAGCCCTTGCCTGCTGCTTCTGCTGCGGCTCGG<br/> CCTGAGAGCCAAAACACTTGTATGCGGAAGAGTTCGGTTCGCTCCTGCTTGTGCGCCGGCATCGTTG<br/> CGCCACATCTAGGATCTGCCAGGAACCGTAAAAAGGCCGCGTGTGCGGTTTTTCCATAGGCTC<br/> CGCCCCCTGACGAGCATCACAAAAATCGACGCTCAAGTCAGAGGTGGCGAAACCCGACAGGACT<br/> ATAAAGATACCAGGCGTTTCCCTGGAAGCTCCCTCGTGCCTCCTCTGCTGCGGCTTCCGCTCGGCT<br/> TACCGGATACCTGTCCGCTTTTCTCCCTTCGGGAAGCGTGGCGCTTCTCATAGCTCACGCTGTAG<br/> GTATCTCAGTTCGGTGTAGGTCGTTCCGCTCAAGCTGGGCTGTGTGCACGAACCCCGTTCAGC<br/> CCGACCGCTGCGCCTTATCCGGTAACTATCGTCTTGTAGTCAAACCCGTAAGACACGACTTATCGC<br/> CACTGGCAGCAGCCACTGGTAAACAGGATTAGCAGAGCGAGGTATGTAGGCGGTGTACAGAGTTC<br/> TTGAAAGTGGTGGCCTAACCTACGGTACACTAGAAGGACAGTATTGGTATCTGCGCTCTGTGAA<br/> GCCAGTTACCTTCGAAAAAGAGTTGGTAGCTTGTATCCGGCAAACAAACCACCGCTGGTAGCG<br/> GTGGTTTTTTGTTTGAAGCAGCAGATTACGCGCAGAAAAAAGGATCTCAAGAAGATCCTTTGA<br/> TCTTTTACGGGGTCTGACGCTCAGTGGAAACGAAAACCTCACGTTAAGGGATTTTGGTTCATGAGAT<br/> TATCAAAAAGGATCTTACCTAGATCCTTTAAATTAATAAATGAAGTTTAACTGCTAAAGTAT<br/> ATATGAGTAAACTTGGTCTGACAGTTACCAATGCTTAATCAGTGAGGCACCTATCTCAGCGATCTG<br/> TCTATTTGCTTTCATCCATAGTTGCCGACTCCCCGTCGTGTAGATAACTACGATACGGGAGGGCT<br/> ACCATCTGGCCCCAGTGTGCAATGATACCGCGAGAACCACGCTCACCGCTCCAGATTTATCAG<br/> CAATAAACAGCCAGCCGGAAGGGCCGAGCGCAGAAGTGGTCTGCAACTTTATCCGCTTCCATC<br/> CAGTCTATTAATTGTTGCCGGGAAGCTAGAGTAAGTAGTTCCGCCAGTTAATAGTTTGCACAACGTT<br/> GTTGCCATTGTACAGGCATCGTGGTGTACGCTCGTCTGTTGGTATGGCTTCATTAGCTCCGGT<br/> TCCCAACGATCAAGGCGAGTTACATGATCCCCATGTTGTGCAAAAAAGCGGTTAGCTCCTTCGGT<br/> CCTCCGATCGTTGTGAGAAGTAAGTTGGCCGAGTGTATCACTCATGGTTATGGCAGCAGCTGCAT<br/> AATTCCTTACTGTATGCCATCCGTAAGATGCTTTTCTGTGACTGGTACTCAACCAAGTCA<br/> TTCTGAGAATAGTGTATGCGGCGACCGAGTTGCTCTTGGCCGGCGTCAATACGGGATAATACCGC<br/> GCCACATAGCAGAACTTAAAAAGTGTCTATCATTGGAAAAAGTCTTCCGGGGCGAAAACTCAAG<br/> GATCTTACCGCTGTGAGATCCAGTTCGATGTAACCCACTCGTGCACCCAACTGATCTCAGCTC<br/> TTTTCTTACCAGCGTTTCTGGGTGAGCAAAAACAGGAAGGCAAAATCCCGCAAAAAAAGGGAA<br/> TAAGGGCGACACGGAAATGTTGAATACTCATACTTCTCCTTTTTCAATATTATTGAAGCATTATCA<br/> GGGTTATTGCTCATGAGCGGATACATATTTGAATGTATTTAGAAAAATAACAAATAGGGGTTCC<br/> CGCACGAATTGGCCAGCGTGCATTTTTGGGGTGGGCGGTTCCGCGGGGAGGGGGCGCAGCC<br/> CCTGGGGGATGGGAGGCCCGCTTAGCGGGCCGGGAGGGTTCGAGAAGGGGGGGGACCCCCCT<br/> TCGGCGTGCAGCGTACCGCGCACAGGGCGCAGCCCTGGTTAAAAACAAGGTTTATAAATATTGGT<br/> TTAAAAGCAGGTTAAAAGACAGGTTAGCGGTGGCCGAAAAACGGGCGGAAACCCCTTGCAATGCT<br/> GGATTTTCTGCCTGTGGACAGCCCTCAAATGTCAATAGGTGCGCCCTCATCTGTGACACTCTG<br/> CCCTCAAAGTGTCAAGGATCGCGCCCTCATCTGACTAGTTCGCGCCCTCAAGTGTCAATACCG<br/> CAGGGCACTTATCCCCAGGCTTGTCCACATCATCTGTGGGAAACTCGCGTAAAAATCAGGCGTTTTT<br/> GCCGATTTGCGAGGCTGGCCAGTCCACGTCGCGCGCCGAAATCGAGCCTGCCCTCATCTGTCA<br/> ACGCGCGCGGGGTGAGTCGGCCCTCAAGTGTCAACGTCGCGCCCTCATCTGTGACTGAGGGCC<br/> AAGTTTTCCGCGAGGTATCCACAACCGCGCGCGCGGTGTCTCGCACACGGCTTCGACGGGCT<br/> TTCTGGCGGTTTGCAGGGCCATAGACGGCCGACCGCCAGCGCGGAGGGCAACACCGCCGTTG<br/> AGCGTCGCAAAGGAGATCCTGATCTGACTGATGGGCTGCCTGTATCGAGTGGTGTATTTGTGCCG<br/> AGCTGCCGGTCCGGGAGCTGTTGGTGGCTGGTGGCAGGATATATTGTGGTGTAAACAAATTGAC<br/> GCTTAGACAACCTAATAACACATTGCGGACGTTTTTAATGTACTGGGGTGGATGCAGTGGGCCCCA<br/> C</p> |
| <p>pTU-4</p> | <p>TCTGTGAAGACAATTACGAATTCCTATGGGGAGTGAGACCGCAGCTGGCACCAGAGGTTTGCCGA<br/> CTGAAAAGCGGGCAGTGAGCGCAACGCAATTAATGTGAGTTAGCTCACTATTAGGCACCCAGG<br/> CTTTACACTTTATGCTTCCGGCTCGTATGTTGTGTGGAATTGTGAGCGGATAACAATTTACACAG<br/> GAAACAGCTATGACCATGATTACGCCAAGCTTGCATGCCTGCAGTGCAGTCTAGAGGATCCCG<br/> GGTACCGAGCTCGAATTCAGTGGCCGCTGTTTTACAACGTCGTGACTGGGAAAAACCTGGCGTTA<br/> CCCAACTAATCGCCTTGCAGCACATCCCCCTTTCGCCAGCTGGCGTAATAGCGAAGAGGGCCGC<br/> ACCGATCGCCCTTCCCAACAGTTGCGCAGCTGAATGGCGAATGGCGCCTGATGCGGTATTTTCT<br/> CCTTACGCATGTGCGGATTTTACACCCGATTTGGTGCATCTCAGTCACTGATGATGATGCG<br/> CGCATAGTTAAGCCAGCCCGACACCCGCAACACCCGCTGACGCGCCCTGACGGGCTGTCTGC<br/> TCCCGCATCCGCTTACAGACAAGCTGTGACGGTCTCACGCTCAGATTGTCTTCTGCACGAAGTGC</p>                                                                                                                                                                                                                                                                                                                                                                                                                                                                                                                                                                                                                                                                                                                                                                                                                                                                                                                                                                                                                                                                                                                                                                                                                                                                                                                                                                                                                                                                                                                                                                                                                                                                                                                                                                                                                                                                                                                                                                                                                                                                                                                                                                                                                                                                                                                                                                                                                                                                                                                                                                                                                                                                                                                                                                                                                                                                                                                                                                                                                                                                                                                                                                                                                                                                                                                                                                                                                                                                                                                                                                                                                                                                                                                                                                                                                                                                                                                                                                                                                                                                                                                                                                      |



|              |                                                                                                                                                                                                                                                                                                                                                                                                                                                                                                                                                                                                                                                                                                                                                                                                                                                                                                                                                                                                                                                                                                                                                                                                                                                                                                                                                                                                                                                                                                                                                                                                                                                                                                                                                                                                                                                                                                                                                                                                                                                                                                                                                                                                                                                                                                                                                                                                                                                                                                                                                                                                                                                                                                                                                                                                                                                                                                                                                                                                                                                                                                                                                                                                                                                                                                                                                                                                                                                                                                                                                                                                                                                                                                                                                                                                                                                                                                                                                                                                                                                                                                                                                                                                                                                                                                                                                                                                                                                                                                                                                                                                                                                                                                                                                                                                                                                          |
|--------------|----------------------------------------------------------------------------------------------------------------------------------------------------------------------------------------------------------------------------------------------------------------------------------------------------------------------------------------------------------------------------------------------------------------------------------------------------------------------------------------------------------------------------------------------------------------------------------------------------------------------------------------------------------------------------------------------------------------------------------------------------------------------------------------------------------------------------------------------------------------------------------------------------------------------------------------------------------------------------------------------------------------------------------------------------------------------------------------------------------------------------------------------------------------------------------------------------------------------------------------------------------------------------------------------------------------------------------------------------------------------------------------------------------------------------------------------------------------------------------------------------------------------------------------------------------------------------------------------------------------------------------------------------------------------------------------------------------------------------------------------------------------------------------------------------------------------------------------------------------------------------------------------------------------------------------------------------------------------------------------------------------------------------------------------------------------------------------------------------------------------------------------------------------------------------------------------------------------------------------------------------------------------------------------------------------------------------------------------------------------------------------------------------------------------------------------------------------------------------------------------------------------------------------------------------------------------------------------------------------------------------------------------------------------------------------------------------------------------------------------------------------------------------------------------------------------------------------------------------------------------------------------------------------------------------------------------------------------------------------------------------------------------------------------------------------------------------------------------------------------------------------------------------------------------------------------------------------------------------------------------------------------------------------------------------------------------------------------------------------------------------------------------------------------------------------------------------------------------------------------------------------------------------------------------------------------------------------------------------------------------------------------------------------------------------------------------------------------------------------------------------------------------------------------------------------------------------------------------------------------------------------------------------------------------------------------------------------------------------------------------------------------------------------------------------------------------------------------------------------------------------------------------------------------------------------------------------------------------------------------------------------------------------------------------------------------------------------------------------------------------------------------------------------------------------------------------------------------------------------------------------------------------------------------------------------------------------------------------------------------------------------------------------------------------------------------------------------------------------------------------------------------------------------------------------------------------------------------------------------|
|              | <p> GTTTAAACTATCAGTGTGGTGGACAGGATATATTGGCGGGTAAACCTAAGAGAAAAGAGCGTTTATTA<br/> GAATAATCGGATATTTAAAAGGGCGTGAAGAGGTTTATCCGTTCTGCCATTTGTATGTGCATGCCA<br/> ACCACAGGGTTCCCCAGATCAGGCGCTGGCTGCTGAACCCCCAGCCGGAATGACCCCAACAAGGC<br/> CCTAGCGTTTGAATGCACAGGTCATCATTGACCCAGGCGTGTCCACAGCCGCGCTTTCTTGCCACGGTC<br/> AACTCTTCGCAGGCTTCGCCGACCTGCTCGCGCCACTTCTTACGCGGGTGGAAATCCGATCCGCA<br/> CATGAGGCGGAAGGTTTCCAGCTTGAGCGGGTACGGCTCCCGGTGCGAGCTGAAATAGTCGAACA<br/> TCCGTCGGGGCCGTCGGCGACAGCTTGGGTACTTCTCCATATGAATTCGTGTAGTGGTCCGCA<br/> GCAAACAGCACGACGATTTCCTCGTCGATCAGGACCTGGCAACGGGACGTTTTCTTGCCACGGTC<br/> CAGGACGCGGAAGCGGTGCAGCAGCGACACCGATTCCAGGTGCCAACCGGGTCCGACGTGAAG<br/> CCCATCGCCGTCGCCTGTAGGCGCGACAGGCATTCTCGGCCTTCGTGTAATACCGGCCATTGAT<br/> CGACCAGCCCAGGTCCTGGCAAAGCTCGTAGAACCTGAAGGTGATCGGCTCGCCGATAGGGGTGC<br/> GCTTCGCGTACTCCAACACCTGCTGCCACACAGTTCGTTCATCGTCGGCCCGCAGCTCGACGCGC<br/> GTGTAGGTGATCTTACGTCCTTGTGACGTGGAAAATGACCTTGTTTTGACGCGCCTCGCGCGG<br/> GATTTTCTTGTGCGCGTGGTGAACAGGGCAGAGCGGGCCGTGTCGTTTGGCATCGCTCGCATCG<br/> TGTCCGGCCACGGCGCAATATCGAAACAAGGAAAGCTGCATTTCTTGTATCGTCTGCTTCTGTGTGT<br/> TCAGCAACGCGGCTGCTTGGCCTGCTGACCTGTTTTGCCAGGTCCTCGCCGCGGTTTTCTCGCT<br/> TCTTGGTCTCATAGTTCTCGCGTGTGATGGTTCATCGACTTCGCCAAACCTGCCCCTGCTGTT<br/> CAAGACGACGCGAACGCTCCACGGCGGCCGATGGCGCGGGCAGGGCAGGGGGAGCCAGTTGCAC<br/> GCTGTGCGCTCGATCTTGCCGTAAGTTCGTTGACCATCGAGCCGACGGACTGGAAGGTTTCGC<br/> GGGCGCACGCGATGACGGTGGCGCTTGGCATGGTTTCGGCATCCTCGCGGAAAACCCCGCGTC<br/> GATCAGTCTTGCCTGTATGCCTTCCGGTCAAACGTCGGATTCACTTACCCTCTTCCGCGGATTGC<br/> CCCGACTCACGCCGGGGCAATGTGCCCTTATTCTGATTTGACCCGCTGGTGCCTTGGTGTCCA<br/> GATAATCCACCTTATCGGCAATGAAGTCGGTCCCGTAGACCGCTTGGCCGTCCTTCTCGTACTTGG<br/> TATTCGAATCTTGCCTGCACGAATACCAGCGACCCCTTGGCCAAATACTTGGCGTGGGCTCGG<br/> CCTGAGAGCCAAAACACTGTATGCGGAAGAAGCTGGTGGCGCTCCTGCTGTGCGCCGATCGTTG<br/> CGCCACATCTAGGATCTGCCAGGAACCGTAAAAAGGCGCGTGTGCGGTTTTTCCATAGGCTC<br/> CGCCCCCTGACGAGCATCAAAAATCGACGCTCAAGTCAGAGGTGGCGAAACCCGACAGGACT<br/> ATAAAGATAACAGGCGTTTTCCCTGGAAGCTCCCTCGTGGCTCTCCTTCTCCGACCTGCGCGT<br/> TACCGGATACCTGTCGCGCTTCTCCCTTCCGGTAAACGTCGGTGGCGTTTTCTCATAGCTACGCTG<br/> GTATCTCAGTTCGGTGTAGGTCGTTGCTCCTCAAGCTGGGCTGTGTGCAGAACCCCGGTTACG<br/> CCGACCGCTGCGCCTTATCCGGTAACCTATCGTCTTGTAGTCCAACCCGTAAGACACGACTTATCGC<br/> CACTGGCAGCAGCCACTGGTAACAGGATTAGCAGAGCGAGGTATGTAGGCGGTGTACAGAGTTC<br/> TTGAAGTGGTGGCCTAACTACGGCTACACTAGAGGACAGTATTTGGTATCTGCGCTCTGCTGAA<br/> GCCAGTTACCTTCGGAAAAAGAGTTGGTATGCTTGTATCCGGCAAACAAACCCGCTGTGTAGCG<br/> GTGGTTTTTTTTGTTTGAAGCAGCAGATTACGCGCAGAAAAAAGGATCTCAAGAAGATCCTTTGA<br/> TCTTTTCTACGGGGTCTGACGCTCAGTGGAACGAAAACCTACGTTAAGGGATTTTGGTCTATGAGAT<br/> TATCAAAAAGGATCTTCACTAGATCCTTTTAAATAAAAATGAAGTTTTAAATCAATCTAAAGTAT<br/> ATATGAGTAAACTTGGTCTGACAGTTACCAATGCTTAATCAGTGAGGACCTATCTCCGCGATCTG<br/> TCTATTTCTGTTTATCCATAGTTGCCTGACTCCCGTCTGTGATAGATAACTACGATACGGGAGGGCTT<br/> ACCATCTGGCCCCAGTGTGCAATGATACCGCGAGAACCACGCTCACCGGCTCCAGATTTATCAG<br/> CAATAAACAGCCAGCCGGAAGGGCCGAGCGCAGAAGTGGTCTTCACTTTATCCGCTCCATC<br/> CAGTCTATAAATTGTTGCGGGAAGCTAGAGTAAAGTGTAGTTTCGCAAGTAAATGTTGCGCAAGT<br/> GTTGCCATTGCTACAGGCATCGTGGTGTACGCTCGTCTGTTTGGTATGGCTTCAATCAGCTCCGGT<br/> TCCCAACGATCAAGGCGAGTTACATGATCCCCATGTTGTGCAAAAAAGCGGTTAGCTCCTTCGGT<br/> CCTCCGATCGTTGTGAGAAGTAAAGTTGGCCGAGTGTATCACTCATGGTTATGGCAGCACTGCAT<br/> AATCTTACTGTGATGCCATCCGTAAGATGCTTTCTGTGACTGGTGTAGTACTCAACCAAGTCA<br/> TTCTGAGAAATAGTGTATGCGGCGACCGAGTGTCTTGGCCGGCGTCAATACGGGATAAATACCGC<br/> GCCACATAGCAGAACTTTAAAAGTGCTCATCATTGAAAAACGTTCTTCCGGGGCGAAAACCTCTCAAG<br/> GATCTTACCGCTGTTGAGATCCAGTTCGATGTAACCCACTCGTGCACCCAACTGATCTTACGATC<br/> TTTTACTTTACCAGCGTTTTCTGGGTGAGCAAAAACAGGAAGGCAAAATCCCGCAAAAAGGGAA<br/> TAAGGGCGACACGGAAATGTTGAATACTATACTTCTTCTTTTCAATATTATGAAGCATTTATCA<br/> GGGTTATTGTCTCATGAGCGGATACATATTTGAATGTATTTAGAAAAATAAACAATAGGGGTTCC<br/> GCGCACGAATTGGCCAGCGCTGCCATTTTGGGGTGAGGCCGTTTCGCGGCGGAGGGGGCGCAGCC<br/> CCTGGGGGGATGGGAGGCCCCGCTTAGCGGGCCGGGAGGGTTCGAGAAGGGGGGGACCCCCCT<br/> TCGGGTCGCGGGTACGCGCACAGGGCGCAGCCCTGGTTAAAAAACAGGCTTTTATAAATATTGGT<br/> TTAAAAGCAGGTTAAAAGACAGGTTAGCGGTGGCCGAAAAACGGGGCGGAAAACCTTGCAAATGCT<br/> GGATTTCTGCCTGTGGACAGCCCTCAAATGTCAATAGGTGCGCCCTCATCTGTGACGACTCTG<br/> CCCCTCAAGTGTCAAGGATCGCGCCCTCATCTGTGACTAGTTCGCGCCCTCAAGTGTCAATACCC<br/> CAGGGCACTTATCCCAAGGCTTGTCCACATCATCTGTGGGAAACTCGCGTAAATACCGCGTTTTT<br/> GCCGATTTGCGAGGCTGGCCAGCTCCACGTCGCGGCGGAAATCGAGCCTGCCCTCATCTGTCA<br/> ACGCCGCGCCGGGTGAGTCGGCCCTCAAGTGTCAACGTCGCGCCCTCATCTGTGACTGAGGGCC<br/> AAGTTTTCCGCGAGGATCCACAACGCGCGCCCGCGGTGTCTCGCACACGGCTTCGACGGCGT<br/> TCTTGGCGGTTTTGCAGGGCCATAGACGGCCCGGACCCAGCGGCGGAGGCAACCCCGGTTG<br/> AGCGTCGCAAAAGGAGATCCTGATCTGACTGATGGGCTGCCTGTATCGAGTGGTATTGTTGTGCG<br/> AGCTGCCGGTCCGGGAGCTGTTGGCTGGTGGTGGCAGGATATATTGTTGTTAAACAATTTGAC<br/> GCTTAGACAACCTAATAACACATTGCGGACGTTTTTAAATGTAAGTGGGGTGGATGCAGTGGGCCCCA<br/> C </p> |
| <p>pTU-5</p> | <p> TCTGTGAAGACAACAGAGAATTCGCATGCGGAGTGAGACCGCAGCTGGCAGCAGAGGTTTGCCGA<br/> CTGGAAAGCGGGCAGTGAGCGCAACGCAATTAATGTGAGTTAGCTCACTCATTAGGCACCCAGG<br/> CTTTACACTTTATGCTTCCGGCTCGTATGTTGTGGAAATTGTGAGCGGATAACAATTTACACAG<br/> GAAACAGCTATGACCATGATTACGCCAAGCTTGCATGCCTGCAGGTCGACTCTAGAGGATCCCCG<br/> GGTACCAGCTCGAATTCACTGGCCGCTGTTTTACAACGTCGTGACTGGGAAAACCTTGGCGTTA<br/> CCCAACTTAATCGCCTTGCAGCACATCCCCCTTTCGCCAGCTGGCGTAATAGCGAAGAGGGCCGC<br/> ACCGATCGCCCTTCCCAACAGTTGCGCAGCCTGAATGGCGAATGGCGCCTGATCGGGTATTTCT<br/> CCTTACGCACTGTGCGGTATTTACACCCGCAATATGGTGCCTCTCAGTACAATCTGCTGTGATGC<br/> CGCATGTTAAGCCAGCCCGACACCCGCAACCCGCTGACGCGCCCTGACGGGCTTGTCTGC<br/> TCCCGCATCCGCTTACAGACAAGCTGTGACGGTCTCACGCTTGTGTTGTCTTCTGCACGAAGTGG<br/> TTTTAACTATCAGTGTGGTGGACAGGATATATTGGCGGGTAAACCTAAGAGAAAAGAGCGTTTATTAG </p>                                                                                                                                                                                                                                                                                                                                                                                                                                                                                                                                                                                                                                                                                                                                                                                                                                                                                                                                                                                                                                                                                                                                                                                                                                                                                                                                                                                                                                                                                                                                                                                                                                                                                                                                                                                                                                                                                                                                                                                                                                                                                                                                                                                                                                                                                                                                                                                                                                                                                                                                                                                                                                                                                                                                                                                                                                                                                                                                                                                                                                                                                                                                                                                                                                                                                                                                                                                                                                                                                                                                                                                                                                                                                                                                                                                                                                                                                                                                                                                                                                               |

|              |                                                                                                                                                                                                                                                                                                                                                                                                                                                                                                                                                                                                                                                                                                                                                                                                                                                                                                                                                                                                                                                                                                                                                                                                                                                                                                                                                                                                                                                                                                                                                                                                                                                                                                                                                                                                                                                                                                                                                                                                                                                                                                                                                                                                                                                                                                                                                                                                                                                                                                                                                                                                                                                                                                                                                                                                                                                                                                                                                                                                                                                                                                                                                                                                                                                                                                                                                                                                                                                                                                                                                                                                                                                                                                                                                                                                                                                                                                                                                                                                                                                                                                                                                                                                                                                                                                                                                                                                                                                                                                                                                                                                                                                                                                                          |
|--------------|--------------------------------------------------------------------------------------------------------------------------------------------------------------------------------------------------------------------------------------------------------------------------------------------------------------------------------------------------------------------------------------------------------------------------------------------------------------------------------------------------------------------------------------------------------------------------------------------------------------------------------------------------------------------------------------------------------------------------------------------------------------------------------------------------------------------------------------------------------------------------------------------------------------------------------------------------------------------------------------------------------------------------------------------------------------------------------------------------------------------------------------------------------------------------------------------------------------------------------------------------------------------------------------------------------------------------------------------------------------------------------------------------------------------------------------------------------------------------------------------------------------------------------------------------------------------------------------------------------------------------------------------------------------------------------------------------------------------------------------------------------------------------------------------------------------------------------------------------------------------------------------------------------------------------------------------------------------------------------------------------------------------------------------------------------------------------------------------------------------------------------------------------------------------------------------------------------------------------------------------------------------------------------------------------------------------------------------------------------------------------------------------------------------------------------------------------------------------------------------------------------------------------------------------------------------------------------------------------------------------------------------------------------------------------------------------------------------------------------------------------------------------------------------------------------------------------------------------------------------------------------------------------------------------------------------------------------------------------------------------------------------------------------------------------------------------------------------------------------------------------------------------------------------------------------------------------------------------------------------------------------------------------------------------------------------------------------------------------------------------------------------------------------------------------------------------------------------------------------------------------------------------------------------------------------------------------------------------------------------------------------------------------------------------------------------------------------------------------------------------------------------------------------------------------------------------------------------------------------------------------------------------------------------------------------------------------------------------------------------------------------------------------------------------------------------------------------------------------------------------------------------------------------------------------------------------------------------------------------------------------------------------------------------------------------------------------------------------------------------------------------------------------------------------------------------------------------------------------------------------------------------------------------------------------------------------------------------------------------------------------------------------------------------------------------------------------------------------------|
|              | <p>AATAATCGGATATTTAAAAGGGCGTGAAAAGGTTTTATCCGTTTCGTCATTTGTATGTGCATGCCAA<br/> CCACAGGGTCCCCAGATCAGGCGCTGGCTGTGAAACCCAGCCGGAACCTGACCCCAACAAGGCC<br/> CTAGCGTTTGCAATGCACCAGGTCATATTGACCAGGCGTGTCCACCAGGCGCTGCCTCGCA<br/> ACTCTTCGACGGCTTCGCCGACCTGCTCGGCCACTTCTTACCGGGTGGAACTCCGATCCGCAC<br/> ATGAGGGCGGAAGGTTTCCAGCTTGAGCGGGTACGGCTCCCGGTGCGAGCTGAAATAGTCAACAT<br/> CCGTCGGGCGCTCGGCGACAGCTTGGCGTACTTCTCCCATATGAATTCGTGTAGTGGTCGCCAG<br/> CAAACAGCACGACGATTTCTCGTCGATCAGGACCTGGCAACGGGACGTTTTCTTGCCACGGTCC<br/> AGGACCGGAAGCGGTGCAGCAGCAGCACCCGATTCCAGGTGCCAACCGGTCGGACGTGAAGC<br/> CCATCGCCGTCGCCGTGATAGGCGCGACAGGCATTCTCGGCCCTTCGTGTAATACCGGCCATTGATC<br/> GACCAGCCAGGTCCTGGCAAAGCTCGTAGAACGTGAAGGTGATCGGCTCGCCGATAGGGGTGC<br/> GCTTCGCGTACTCCAACACCTGCTGCCACACCAGTTCGTCATCGTCGGCCCGCAGCTCGACGCGG<br/> GTGATGGTACTTTCACGTCTTGTGACGTGGAAAATGACCTTGTGTTGACGCGCTCGCGCGG<br/> GATTTTCTTGTGCGCGTGGTGAACAGGGCAGAGCGGGCCGTGTCGTTTGGCATCGCTCGCATCG<br/> TGTCCGGCCACGGCGCAATATCGAACAAGGAAAGCTGCATTTCCCTGATCTGCTGCTTCGTGTGT<br/> TCAGCAACGCGGCCCTGCTTGGCCTCGCTGACCTGTTTTGCCAGGTCCTCGCCGCGGTTTTTCGT<br/> TCTTGGTCGTATAGTTCCTCGCGTGTGATGGTTCATCGACTTCGCCAAACCTCGCCCTCTGT<br/> CAAGACGACGCGAACGCTCCACGGCGGCCGATCGCGCGGGCAGGGCAGGGGAGCTTGTGCAC<br/> GCTGTGCGGCTCGATCTTGGCCGTAGCTTGTGACCATCGAGCCGACGGACTGGAAGGTTTCGC<br/> GGGGCGCACGATGACGGTGCGGCTTGGCATGTTTCGGCATCCTCGGCGGAAAACCCCGCGTC<br/> GATCAGTTCCTGCTGTATGCCTTCCGGTCAAACGTCGATTCACTTCCCTCTGCGGGATTGTC<br/> CCCGACTACGCGGGGCAATGTGCCCTTATTCTGATTGACCCGCTGGTGTGTTGTTGTTGCCA<br/> GATAATCCACCTTATCGGCAATGAAGTCGGTCCCGTAGACCGCTGCGCCGTCCTTCTCGTACTTGG<br/> TATTCGAATCTTGCCTGCACGAATACCAGCGACCCCTTGCCCAAATACTTGGCGTGGGCTCGG<br/> CCTGAGAGCCAAAACACTTGATGCGGAAGAAGTCGGTGGCTCCTGCTGTGCGCCGATCGTTG<br/> CGCCACTAGGATCTGCCAGGAACCTGAAAGGCGCGGTTGCTGGCTTTTTCATAGGCTC<br/> CGCCCCCTGACGAGCATCACAATAATCGACGCTCAAGTCAGAGGTGGCGAAAACCCGACAGGACT<br/> ATAAAGATACCAGGCGTTTCCCTTGGAAAGCTCCCTCGTGGCTCTCCTGTTCCGACCCTGCCGCT<br/> TACCGGATACCTGTCCGCTTTTCTCCCTTCGGGAAGCGTGGCGCTTCTCATAGCTCACGCTGTAG<br/> GTATCTCAGTTCGGGTGAGGTCGTTCTGCTTCAAGCTGGGCTGTGTGCACGAAACCCCTTCAGC<br/> CCGACCGCTGCGCCTTATCCGGTAACTATCGTCTTGTAGTCCAACCCGTAAGACACGACTTATCGC<br/> CACTGGCAGCAGCCACTGGTAACAGGATTAGCAGAGCGAGGTATGTAGGCGGTGCTACAGAGTTC<br/> TTGAAGTGGTGGCCCTAACTACGGCTACACTAGAAGGACAGTATTTGGTATCTGCGCTCTGCTGAA<br/> GCCACTTACCTCGGAAAAAGAGTTGGTAGCTCTTGTATCCGGCAAACAAACCCGCTGGTAGCG<br/> GTGGTTTTTTGTTTGAAGCAGCAGATTACGCGCAGAAAAAAGGATCTCAAGAAAGATCCTTTGA<br/> TCTTTTCTACGGGGTCTGACGCTCAGTGAACGAAAACCTCACGTTAAGGGATTTTGGTTCATGAGAT<br/> TATCAAAAAGGATCTTACCTAGATCCTTTAAATTAATAAATGAAGTTTAAATCAATCTAAAGTAT<br/> ATATGAGTAAACTTGGTCTGACAGTTACCAATGCTTAATCAGTGAGGACCTATCTCAGCGATCTG<br/> TCTATTTCTGTTTACCATAGTTGCTGACTCCCTGACTGCTGTAGATAAATCAAGATACGGGAGGCT<br/> ACCATCTGGCCCCAGTGTGCAATGATACCGCGAGAACCACGCTCACCGGCTCCAGATTTATCAG<br/> CAATAAACAGCCAGCCGGAAGGGCGAGCGCAGAAGTGGTCTGCAACTTTATCCGCTCCATC<br/> CAGTCTATTAATTTGTTGCCGGAAGCTAGAGTAAGTATGTTCCGCAAGTAAATAGTTTGGCAACGTT<br/> GTTGCCATTGCTACAGGCATCGTGGTGTACGCTCGTCTGTTGGTATGGTTCATTAGCTCCGGT<br/> TCCCAACGATCAAGGCGAGTTACATGATCCCCATGTTGTGCAAAAAAGCGGTTAGCTCCTTCGGT<br/> CCTCCGATCGTTGTGAGAAGTAAAGTTGGCCGAGTGTATCACTCATGGTTATGGCAGCACTGCAT<br/> AATTCCTTACTGTATGCCATCCGTAAGATGCTTTTCTGTGACTGGTGAAGTACTCAACCAAGTCA<br/> TTCGAGAATAGTATGCGGCGACCGAGTTGCTCTTGGCCGGGCTCAATACGGGATAAATACCCG<br/> GCCACATAGCAGAACTTAAAAAGTCTCATCTATGGAAAAACGTTCTTCGGGGGAAAACTCTCAAG<br/> GATCTTACCGCTGTTGAGATCCAGTTCGATGAACCCACTCGTGACCCAACTGATCTCAGCATC<br/> TTTTACTTTACAGCGTTTCTGGGTGAGCAAAAACAGGAAGGCAAAATCCCGCAAAAAAGGGAA<br/> TAAGGGCGACACGGAATGTTGAATACTATACTTCCCTTTTCAATATTATTGAAGCATTTATCA<br/> GGTTATTGTCTCATGAGCGGATACATATTGAAATGTAATTTAGAAAAATAAACAAATAGGGGTTCC<br/> GCGCACGAATTGGCCAGCGCTGCCATTTTGGGGTGAAGCCGTTTCGGGCGGAGGGGGCGAGCC<br/> CCTGGGGGGATGGGAGGCCCGCTTAGCGGGCCGGAGGGTTCGAGAAGGGGGGGCACCCCTT<br/> TCGGCGTGGCGGTCACGGCGACAGGGCGAGCCCTGGTTAAAAACAAGGTTATAAATATTGGT<br/> TAAAAACAGGTTAAAAAGACAGGTTAGCGGTGGCCGAAAAACGGGCGGAAACCTTGAATGCT<br/> GGATTTTCTGCCTGTGGACAGCCCTCAAATGTCAATAGGTGCGCCCTCATCTGTGCAACTCTG<br/> CCCCTCAAGTGTCAAGGATCGCGCCCTCATCTGTGCTAGTGTGCGCCCTCAAGTGTCAATACCG<br/> CAGGGCACTTATCCCAAGGCTTGTCCACATCATCTGTGGGAAACTCGCGTAAAACTCAGGCGTTTTT<br/> GCCGATTTGCGAGGCTGGCCAGCTCCACGTCGCCGCGGAAATCGAGCTCCCTCATCTGTCA<br/> ACGCGCGCGCGGGTGTGTCGGCCCTCAAGTGTCAACGTCGCCCTCATCTGTGCTAGTGGGGCC<br/> AAGTTTTCCGCGAGGTATCCACAACGCGCGGCGCGGGTGTCTGCGACACGGCTTCGACGGCGT<br/> TTCGGCGCGTTTGCAGGGCCATAGACGGCCGACGCGGCGGCGGAGGGAACAGCCAGCCGGT<br/> AGCTCGCAAAAGGAGATCCTGATCTGACTGTAGGGCTGCTGATCGAGGTGACTTGTGTCGG<br/> AGTTCGGGTCGGGGAGCTGTTGGCTGGTGGTGGCAGGATATATTGGTGTAAACAAATTGAC<br/> GCTTAGACAACCTAATAACACATTGCGGACGTTTTTAATGTACTGGGGTGGATGCAGTGGCCCCA<br/> C</p> |
| <p>pTU-6</p> | <p>TCTGTGAAGACAATGTGGAATTCCTCGAGGGAGTGAGACCCGACGCTGGCAGCAGAGGTTTGGCGA<br/> CTGAAAAGCGGGCAGTGAGCGCAACGCAATTAATGTGAGTTAGCTCACTATTAGGCACCCAGG<br/> CTTTACACTTTATGCTTCCGGCTCGTATGTTGTGTGGAATTGTGAGCGGATAACAATTTACACAG<br/> GAAACAGCTATGACCATGATTACGCCAAGCTTGCATGCCTGCAGGTGCAGCTTAGAGGATCCCCG<br/> GGTACCAGCTCGAATTCAGTGGCGTCTGTTTACAACGTCGTGACTGGGAAAAACCTGGCGTTA<br/> CCCAACTTAATCGCCTTGCAGCACATCCCCCTTTCGCCAGCTGGCGTAATAGCGAAGAGGCCCG<br/> ACCGATCGCCCTTCCCAACAGTTGCGCAGCCTGAATGGCGAATGGCGCCTGATGCGGTATTTTCT<br/> CCTTACGCATCTGTGCGGTATTTACACCGCATATGGTCACTCTCAGTACAATCTGCTCTGATGC<br/> CGCATAGTTAAGCCAGCCCGACACCCGCAACCCGCTGACGCGCCCTGACGGGCTGATGCTGC<br/> TCCCGACTCCGCTTACAGACAAGCTGTGACGGTCTCACGCTGAGCTTGTCTTGTGACGAAAGT<br/> GTTTAAACTATCAGTGTGTTGACAGGATATATTGGCGGGTAAACCTAAGAGAAAAAGAGCGTTTATTA<br/> GAATAATCGGATATTTAAAAGGGCGTGAAAAGGTTTTATCCGTTTCGTCATTTGTATGTGCATGCCA</p>                                                                                                                                                                                                                                                                                                                                                                                                                                                                                                                                                                                                                                                                                                                                                                                                                                                                                                                                                                                                                                                                                                                                                                                                                                                                                                                                                                                                                                                                                                                                                                                                                                                                                                                                                                                                                                                                                                                                                                                                                                                                                                                                                                                                                                                                                                                                                                                                                                                                                                                                                                                                                                                                                                                                                                                                                                                                                                                                                                                                                                                                                                                                                                                                                                                                                                                                                                                                                                                                                                                                                                                                                                                                                                                                                                                                                                         |

|       |                                                                                                                                                                                                                                                                                                                                                                                                                                                                                                                                                                                                                                                                                                                                                                                                                                                                                                                                                                                                                                                                                                                                                                                                                                                                                                                                                                                                                                                                                                                                                                                                                                                                                                                                                                                                                                                                                                                                                                                                                                                                                                                                                                                                                                                                                                                                                                                                                                                                                                                                                                                                                                                                                                                                                                                                                                                                                                                                                                                                                                                                                                                                                                                                                                                                                                                                                                                                                                                                                                                                                                                                                                                                                                                                                                                                                                                                                                                                                                                                                                                                                                                                                                                                                                                                                                                                                                                                                                                                                                                                                                                                                               |
|-------|-------------------------------------------------------------------------------------------------------------------------------------------------------------------------------------------------------------------------------------------------------------------------------------------------------------------------------------------------------------------------------------------------------------------------------------------------------------------------------------------------------------------------------------------------------------------------------------------------------------------------------------------------------------------------------------------------------------------------------------------------------------------------------------------------------------------------------------------------------------------------------------------------------------------------------------------------------------------------------------------------------------------------------------------------------------------------------------------------------------------------------------------------------------------------------------------------------------------------------------------------------------------------------------------------------------------------------------------------------------------------------------------------------------------------------------------------------------------------------------------------------------------------------------------------------------------------------------------------------------------------------------------------------------------------------------------------------------------------------------------------------------------------------------------------------------------------------------------------------------------------------------------------------------------------------------------------------------------------------------------------------------------------------------------------------------------------------------------------------------------------------------------------------------------------------------------------------------------------------------------------------------------------------------------------------------------------------------------------------------------------------------------------------------------------------------------------------------------------------------------------------------------------------------------------------------------------------------------------------------------------------------------------------------------------------------------------------------------------------------------------------------------------------------------------------------------------------------------------------------------------------------------------------------------------------------------------------------------------------------------------------------------------------------------------------------------------------------------------------------------------------------------------------------------------------------------------------------------------------------------------------------------------------------------------------------------------------------------------------------------------------------------------------------------------------------------------------------------------------------------------------------------------------------------------------------------------------------------------------------------------------------------------------------------------------------------------------------------------------------------------------------------------------------------------------------------------------------------------------------------------------------------------------------------------------------------------------------------------------------------------------------------------------------------------------------------------------------------------------------------------------------------------------------------------------------------------------------------------------------------------------------------------------------------------------------------------------------------------------------------------------------------------------------------------------------------------------------------------------------------------------------------------------------------------------------------------------------------------------------------------------|
|       | <p>ACCACAGGGTTCCCCAGATCAGGCGCTGGCTGCTGAACCCCCAGCCGGAAGTACCCCCACAAGGC<br/> CCTAGCGTTTGCAATGCACCAGGTCATCATTGACCCAGGCGTGTCCACCAGGCCGCTGCCTCGC<br/> AATCTTCGCAGGCTTCGCCGACCTGCTCGCGCCACTTCTTACGCGGGTGGAAATCCGATCCGCA<br/> CATGAGGCGGAAGGTTTCCAGCTTGAGCGGGTACGGCTCCCGGTGCGGAAATAGTCCGAACA<br/> TCCGTCGGGGCCGTCGGCGACAGCTTGCAGTACTTCTCCATATGAATTCGTGTAGTGGTCCGCA<br/> GCAAACAGCAGCAGGATTCCTCGTCGATCAGGACCTGGCAACGGGACGTTTTCTTGCCACGGTC<br/> CAGGACGCGGAAGCGGTGCAGCAGCGACACCCGATTCAGGTGCCAACCGGGTCGGACGTGAAG<br/> CCCATCGCCGTCGCCTGTAGGCGCGACAGGCATTCCTCGGCCTTCGTGTAATACCGGCCATTGAT<br/> CGACCAGCCCAGGTCCTGGCAAAGCTCGTAGAACGTGAAGGTGATCGGCTCGCCGATAGGGGTGC<br/> GCTTCGCGTACTCCAACACCTGCTGCCACACCAGTTCGTATCGTCGGCCCCGAGCTCGACGCCG<br/> GTGTAGGTGATCTTACGTCCTTGTGACGTGGAATAATGACCTTGTTTTGACGCGCTCGCGCGG<br/> GATTTTCTGTGCGGTGGTGAACAGGGCAGAGCGGGCCGTGTCGTTTGGCATCGTCCGATCG<br/> TGTCGGGCCACGGCGCAATATCGAAACAAGGAAAGCTGCATTTCTTGATCTGCTGCTTCGTGTGT<br/> TCAGCAACGCGGCCGCTTGGCTCGCTGACCTGTTTTGCCAGGTCCTCGCCGGCGGTTTTTCGCT<br/> TCTTGGTCGTCATAGTTCCTCGCGTGTGATGGTATCGACTTCGCCAAACCTGCCGCTCTGTT<br/> CAAGACGCGCAACGCTCCACGCGGCCGATGGCGGGCAGGGCAGGGGAGCCAGTTGCAC<br/> GCTGTCGCGCTCGATCTTGGCCGATAGTTGCTGGACCATCGAGCCGACGGACTGGAAGTTTCGC<br/> GGGGCGCACGATGACGGTGGGCTTGGCATGGTTTCGGCATCCTCGGGGAAACCCCCGCGTC<br/> GATCAGTCTTGCTGTATGCCTTCCGGTCAAACCTCCGATTCATTACCCTCTTGGGGATTGC<br/> CCCAGTACGCGGGCAATGTGCCCTTATTCCTGATTTGACCCGCTGGTGCCTTGGTGTCCA<br/> GCAACTCACCTTATCGGCAATGAAGTCGGTCCCGTAGACCGTCTGGCGCTCTCTCGTATGG<br/> TATTCGGAATCTTGCCCTGCACGAATACCAGCGACCCCTTGCCAAATACTTGCCGTGGGCCTCGG<br/> CCTGAGAGCCAAAACACTTGATGCGGAAGAAGTCGGTGCCTCCTGTTGTCGCGCCGATCGTTG<br/> CGCCACATCTAGGATCTGCCAGGAACCGTAAAAAGCCGCGTGTGCGGTTTTTCCATAGGTC<br/> CGCCCCCTGACGAGCATCAAAAAATCGACCTCAAGTCAGAGGTGGCGAAACCCAGCAGGACT<br/> ATAAAGATAACCAGGCGTTTTCCCCCTGGAAGCTCCCTCGTGGCTCTCTGTTCCGACCCTGCCGCT<br/> TACCGGATACCTTCCGCTTTCTCCCTTCGGGAAGCGTGGCGCTTCTCATAGCTCACGCTGTAG<br/> GTATCTCAGTTCGGTGTAGGTCGTTCTCGCTCAAGCTGGGCTGTGTGCACGAACCCCCCGTTGAG<br/> CCGACCTGCGCCTTATCCGGTAACACTATCGTCTTGTAGTCCAACCCGTAACCCGATCTATCGC<br/> CACTGGCAGCAGCCACTGGTAACAGGATTAGCAGAGCGAGGTATGTAGGCGGTGTACAGAGTTC<br/> TTGAAGTGGTGGCTAACTACGGCTACACTAGAAGGACAGTATTTGGTATCTGCGCTCTGCTGAA<br/> GCCAGTTACCTTCGGAAGAGGTTGGTAGCTCTTGTATCCGGCAAACAACCCACCGCTGGTAGCG<br/> GTGGTTTTTTGTTGCAAGCAGCAGATTACGCGCAGAAAAAAGGATCTCAAGAAGATCTTTGA<br/> TCTTTTCTACGGGCTGACGCTCAGTGGAAACGAAACTCACGTTAAGGATTTTGGTCTAGAT<br/> TATCAAAAAGGATCTTACCTAGATCCTTTAAATTAATAAATGAAGTTTTAAATCAATCTAAAGTAT<br/> ATATGAGTAAACTTGGTCTGACAGTTACCAATGCTTAATCAGTGAGGCACCTATCTCAGCGATCTG<br/> TCTATTTGTTTATCCATAGTTGCCTGACTCCCGTGTGTAGATAACTACGATACGGGAGGGCTT<br/> ACCATCTGGCCCAAGTGTGCAATAGATACCCGCGAGAACCAGCTCACCGCTCCAGATTATACG<br/> CAATAAACCCAGCCAGCCGGAAGGGCCGAGCGCAGAAGTGGTCTGCAACTTTATCCGCTCCATC<br/> CAGTCTATAATTGTTGCCGGGAAGCTAGAGTAAGTAGTTCGCCAGTTAATAGTTTGGCAACGTT<br/> GTTGCCATTGTACAGGCATCGTGGTGTACGCTCGTCTGTTGGTATGGCTTCATTAGCTCCGCT<br/> TCCCAACGATCAAGGCGAGTTACATGATCCCCCTAGTGTGTGCAAAAAAGCGGTTAGCTCCTCGGT<br/> CCTCCGATCGTTGTGCAAGTAAGTTGGCCGAGTGTATCACTCATGGTTATGGCAGCACTGCAT<br/> AATCTCTTACTGTATGCCATCCGTAAGATGCTTTTCTGTGACTGGTGTAGTACTCAACCAAGTCA<br/> TTCTGAGAATAGTGTATGCGGCGACCGAGTTGCTCTTGGCCGGCGTCAATACGGGATAATACCG<br/> GCCATATGACGAGAACTTAAAAAGTGTCTATCTATTTGAAACGTTCTTCGGGGCGAAAACTCAAG<br/> GATCTTACCGCTGTGAGATCCAGTTCGATGTAACCCACTCGTGCAACCAAGTACTTTCAGCATC<br/> TTTTACTTTACCAGCGTTTCTGGGTGAGCAAAAACAGGAAGGCAAAATGCCGAAAAAAGGGAA<br/> TAAGGGCGACACGAAATGTTGAATACTCATACTTCTCTTTTCAATATTATGAAGCATTATCA<br/> GGTTATTGTCTCATGAGCGGATACATATTTGAATGTATTTAGAAAAATAACAAATAGGGGTTCC<br/> CGCACGAAATGGCCAGCGCTGCCATTTTTGGGTGAGGCCGTTTCGCGGGCGAGGGGCGCACCC<br/> CCTGGGGGGATGGGAGGCCCGCTTAGCGGGCCGGGAGGGTTCGAGAAGGGGGGGCACCCCCCT<br/> TCGGCGTGCAGCGTACGCGCACAGGGCGCAGCCCTGGTTAAAAACAAGGTTTATAAATATTGTT<br/> TTAAAGCAGGTTAAAAAGCAGGTTAGCGGTGGCCGAAAAACGGGGCGAAAACTTGCAAATGCT<br/> GGATTTCTGCTGTGGACAGCCCCCTCAAATGCTCAATAGGTGCGCCCTCACTGTGCAACTCTG<br/> CCCCCAAGTGTCAAGGATCGCGCCCTCATCTGTGCTAGTGTGCGGCCCTCAAGTGTCAATACCG<br/> CAGGGCACTTATCCCAAGGCTTGTCCACATCATCTGTGGGAACTCGCGTAAAAATCAGGCGTTTT<br/> GCCGATTTGCGAGGCTGGCCAGCTCCACGTCGCCGGCCGAAATCGAGCTGCCCCCTCATCTGTCA<br/> ACGCGCGCCGGGTGAGTCGGCCCTCAAAGTGTCAACGTCGCGCCCTCATCTGTGCAAGGGCC<br/> AAGTTTTCCGCGAGGTATCCACAACGCGGGCGGGCGGTGTCTCGCACACGGCTTCGACGGCGT<br/> TTCTGGCGGTTGACAGGGCCATAGACGGCCGCCAGCCAGCGGGCAGGGCAACCAGCCCGGTG<br/> AGCGTCGCAAAAGGAGATCTGATCTGACTGATGGGCTGCCTGTATCGAGTGGTATTTGTGCGC<br/> GCTTACCGGTCGGGGAGCTGTGGCTGGTGGCAGGATATATTGGTGTAAACAAATTTGAC<br/> GCTTAGACAACCTAATAACACATTTGCGGACGTTTTTAATGTACTGGGTGGATGCAAGTGGCCCA<br/> C</p> |
| pTU-7 | <p>TCTGTGAAGACAAGAGCGAATTCCATATGGGAGTGAGACCCGAGCTGGCACGACAGGTTTGCCGA<br/> CTGGAAGCGGGCAGTGAGCGCAACGCAATTAATGTGAGTTAGTCACTCATTAGGCACCCAGG<br/> CTTACACTTTATGCTTCCGGCTCGTATGTTGTGGAAATTGTGAGCGGATAACAATTCACACAG<br/> GAAACAGCTATGACCATGATTACGCCAAGCTTGCATGCCTGCAGGTCGACTCTAGAGGATCCCCG<br/> GGTACCGAGCTCGAATTCAGTGGCCGTCGTTTTACAACGTCGTGACTGGGAAAAACCTGGCGTTA<br/> CCCAACTTAATCGCTTGCAGCACATCCCCCTTTCGCCAGCTGGCGTAATAGCGAAGAGGGCCGC<br/> ACCGATCGCCCTTCCCAACAGTTGCGCAGCCTTAATGGCGAATGGCGCCTGATGCGGTTTCT<br/> CCTTACGCATCTGTGCGGATTTTACACCCGATATGGTGCATCTCAGTACAATCTGCTCTGATGC<br/> CGCATAGTTAAGCCAGCCCGACACCCGCCAACCCCGCTGACGCGCCCTGACGGGCTTGTCTGC<br/> TCCCGGCATCCGCTTACAGACAAGCTGTGACGGTCTACGCTAACGTTGTCTTGCACGAAGT<br/> GTTTAAACTCAGTGTGTTGACAGGATATATTGGCGGTAACCTAAGAGTAACAAAGAGCGTTTATTA<br/> GAATAATCGGATATTTAAAAAGGGCGTGAAGAGGTTTATCCGTTTCGTCATTTGTATGTGATGCCA<br/> ACCACAGGGTTCCCCAGATCAGGCGCTGGCTGCTGAACCCCCAGCCGGAAGTACCCCCACAAGGC</p>                                                                                                                                                                                                                                                                                                                                                                                                                                                                                                                                                                                                                                                                                                                                                                                                                                                                                                                                                                                                                                                                                                                                                                                                                                                                                                                                                                                                                                                                                                                                                                                                                                                                                                                                                                                                                                                                                                                                                                                                                                                                                                                                                                                                                                                                                                                                                                                                                                                                                                                                                                                                                                                                                                                                                                                                                                                                                                                                                                                                                                                                                                                                                                                                                                                                                                                                                                                                                                                                                                                                                                                                                                                                                |

|              |                                                                                                                                                                                                                                                                                                                                                                                                                                                                                                                                                                                                                                                                                                                                                                                                                                                                                                                                                                                                                                                                                                                                                                                                                                                                                                                                                                                                                                                                                                                                                                                                                                                                                                                                                                                                                                                                                                                                                                                                                                                                                                                                                                                                                                                                                                                                                                                                                                                                                                                                                                                                                                                                                                                                                                                                                                                                                                                                                                                                                                                                                                                                                                                                                                                                                                                                                                                                                                                                                                                                                                                                                                                                                                                                                                                                                                                                                                                                                                                                                                                                                                                                                                                                                                                                                                                                                                                                                                                                                                                                                                                                 |
|--------------|-------------------------------------------------------------------------------------------------------------------------------------------------------------------------------------------------------------------------------------------------------------------------------------------------------------------------------------------------------------------------------------------------------------------------------------------------------------------------------------------------------------------------------------------------------------------------------------------------------------------------------------------------------------------------------------------------------------------------------------------------------------------------------------------------------------------------------------------------------------------------------------------------------------------------------------------------------------------------------------------------------------------------------------------------------------------------------------------------------------------------------------------------------------------------------------------------------------------------------------------------------------------------------------------------------------------------------------------------------------------------------------------------------------------------------------------------------------------------------------------------------------------------------------------------------------------------------------------------------------------------------------------------------------------------------------------------------------------------------------------------------------------------------------------------------------------------------------------------------------------------------------------------------------------------------------------------------------------------------------------------------------------------------------------------------------------------------------------------------------------------------------------------------------------------------------------------------------------------------------------------------------------------------------------------------------------------------------------------------------------------------------------------------------------------------------------------------------------------------------------------------------------------------------------------------------------------------------------------------------------------------------------------------------------------------------------------------------------------------------------------------------------------------------------------------------------------------------------------------------------------------------------------------------------------------------------------------------------------------------------------------------------------------------------------------------------------------------------------------------------------------------------------------------------------------------------------------------------------------------------------------------------------------------------------------------------------------------------------------------------------------------------------------------------------------------------------------------------------------------------------------------------------------------------------------------------------------------------------------------------------------------------------------------------------------------------------------------------------------------------------------------------------------------------------------------------------------------------------------------------------------------------------------------------------------------------------------------------------------------------------------------------------------------------------------------------------------------------------------------------------------------------------------------------------------------------------------------------------------------------------------------------------------------------------------------------------------------------------------------------------------------------------------------------------------------------------------------------------------------------------------------------------------------------------------------------------------------------------|
|              | <p>CCTAGCGTTTGC AATGCACCAGGTCATCATTGACCCAGGCGTGTCCACCAGGCCGCTGCCTCGC<br/> AACTCTTCGCAGGCTTCGCCGACCTGCTCGCGCCACTTCTTCACGCGGGTGGAAATCCGATCCGCA<br/> CATGAGGCGGAAGGTTCCAGCTTGAGCGGGTACGGCTCCCGGTGCGAGCTGAAATAGTCAACA<br/> TCCGTGCGGCGTCCGCGACAGCTTGCGGTACTTCTCCATATGAATTTCTGTGTAGTGGTCCGA<br/> GCAAACAGCAGCAGGATTTCTCGTCGATCAGGACCTGGCAACGGGACGTTTTCTTGCACGGTC<br/> CAGGACGCGGAAGCGGTGCAGCAGCGACACCGATTCCAGGTGCCAACGCGGTTCGGACGTGAAG<br/> CCCATCGCCGTCGCCTGTAGGCGCGACAGGCATTCTCGGCCTTCGTGTAATACCGGCCATTGAT<br/> CGACCAGCCAGGTCCTGGCAAAGCTCGTAGAACGTGAAGGTGATCGGGCTCGCGATAGGGGTGC<br/> GCTTCGCGTACTCCAACACCTGCTGCCACACCAGTTCGTCATCGTCGGCCCGCAGCTCGACGCCG<br/> GTGTAGGTGATCTTCACGTCCTTGTGACGTGGAAAATGACCTTGTTTTGCAGCGCCTCGCGCGG<br/> GATTTTCTTGTGCGCGTGGTGAACAGGGCAGAGCGGGCCGTGTCGTTTGGCATCGCTCGCATCG<br/> TGTCCGGCCACGGCGCAATATCGAACAAGGAAAGCTGCATTTCCCTTGATCTGCTGCTTCGTGTGT<br/> TCAGCAACGCGGCCCTGCTTGGCCTCGCTGACCTGTTTTGCCAGGTCCTCGCCGGCGGTTTTTCGCT<br/> TCTTGGTCGTCATAGTTCCTCGCGTGTGATGGTCATCGACTTCGCCAAAACCTGCCGCCTCCTGTT<br/> CAAGACGACGCGAACGCTCCACGGCGGGCGATGGCGCGGGCAGGGCAGGGGGAGCCAGTTGCAC<br/> GCTGTGCGCTCGATCTTGGCCGTAGCTTGTGTCGACCATCGAGCCGAGCCGATGGAAGGTTTCGC<br/> GGGGCGCAGCATGACGGTGCGGCTTGCATGGTTTTCCGCATCCTCGCGGAAACCCCGCTC<br/> GATCAGTTCTTGCCTGTATGCCTTCCGGTCAAACGTCGATTATTACCCTCCTTGCGGGATTGC<br/> CCCGACTCACGCCGGGCAATGTGCCCTTATTCTGATTTGACCCGCTGGTGCCTTGGTGTCCA<br/> GATAATCCACCTTATCGGCAATGAAGTCGGTCCCCTAGACCGTTCGGCCGCTTCTCTGACTTGG<br/> TATTCGAATCTTGCCTGCAAGTACAGCAATACAGCCACCCCTTGCCCAAATATCCCGTGGCCCTCGG<br/> CCTGAGAGCCAAAACACTTGTATGCGGAAGAAGTCGGTGCCTCCTGCTTGTTCGCCGGCATCGTTG<br/> CGCCACATCTAGGATCTGCCAGGAACCGTAAAAAGGCCGCGTTGCTGGCGTTTTTCCATAGGCTC<br/> CGCCCCCTGACGAGCATCAAAAAATCGACGCTCAAGTCAGAGGTGGCGAAACCCGACAGGACT<br/> ATAAAGTACCAGGCGTTTCCCTGGAAGTCTCCCTCGTGCCTCCTCTGCTTCCGACCTGGCGCT<br/> TACCGGATACCTGTCCGCTTTTCTCCCTTCGGGAAGCGTGGCGCTTTCTCATAGCTCACGCTGTAG<br/> GTATCTCAGTTCGGTGTAGGTCGTTGCTCCAAGCTGGGCTGTGTGCACGAACCCCGCTCAGC<br/> CCGACCGCTGCGCCTTATCCGGTAACTATCGTCTTGTAGTCCAACCCGGTAAAGACACGACTTATCGC<br/> CACTGGCAGCAGCCACTGGTAAACAGGATTAGCAGAGCGAGGTATGTAGGCGGTGTCACAGATT<br/> TTGAAGTGGTGGCCTAACTACGGCTACACTAGAAAGGACAGTATTTGGTATCTGCGCTCTGCTGAA<br/> GCCAGTTACCTTCGAAAAAGAGTTGGTAGCTCTTGATCCGGCAAACAAACCCGCTGGTAGCG<br/> GTGGTTTTTTGTTTGAAGCAGCAGATTACGCGCAGAAAAAAGGATCTCAAGAAGATCCTTTGA<br/> TCTTTTACGCGGTCTGACGCTCAGTGGAAACGAAATCACGTTAAGGGATTTTGGTCAAGAT<br/> TATCAAAAAAGGATCTTACCTAGATCCTTTAAATATAAATAAAGTAAAGTTTTAAATTAAGAT<br/> ATATGAGTAAACTTGGTCTGACAGTTACCAATGCTTAATCAGTGAGGCACCTATCTCAGCGATCTG<br/> TCTATTTGCTTCATCCATAGTTGCCCTGACTCCCCGTCGTGTAGATAACTACGATACGGGAGGGCT<br/> ACCATCTGGCCCCAGTGTGCAATGATACCGCGAGAACCAGCTCACCGCTCCAGATTTATCAG<br/> CAATAAACAGCCAGCCGGAAGGCGGAGCGCAGAAAGTGGTCTGCAACTTTTACCGCTTCCATC<br/> CAGTCTATTAATTGTTGCCGGGAAGCTAGAGTAAGTAGTTCGCCAGTTAATAGTTTGCACAACGTT<br/> GTTGCCATTGCTACAGGCATCGTGGTGTACGCTCGTCTGTTGGTATGGCTTCATTACGCTCCGGT<br/> TCCCAACGATCAAGGCGAGTTACATGATCCCCATGTTGTGCAAAAAAGCGGTTAGCTCCTTCGGT<br/> CCTCCGATCGTTGTGAGAAGTAAGTTGGCCGAGTGTATCACTCATGGTTATGGCAGCAGTGCAT<br/> AATCTCTTACTGTATGCCATCCGTAAGATGCTTTTCTGTGACTGGTGTACTCAACCAAGTCA<br/> TTCTGAGAAATAGTGTATGCGGCGACCGAGTTGCTCTTGCCTGGCGTCAATACGGGATAATACCG<br/> GCCACATAGCAGAATTTAAAAAGTCTCATATTGGAAAAAGTTCTTCGGGGCGAAAACTCAAG<br/> GATCTTACCGTGTGAGATCCAGTTCGATGTAACCCACTCGTGCACCAACTGATCTCAGCTC<br/> TTTTACTTACCAGCGTTTCTGGGTGAGCAAAAAAGGAAAGGCAAAATCCGCAAAAAAGGGAA<br/> TAAGGGCGACACGGAAATGTTGAATACTCATACTCTTCTTTTCAATATTATTGAAGCATTATCA<br/> GGGTTATTGCTCATGAGCGGATACATATTGAAATGATTTAGAAAAATAAACAAATAGGGGTTCC<br/> CGCAGCAATGGCCAGCGTGCATTTTGGGGTGAAGCCGTTCCGGCCGAGGGGGCGCAGCC<br/> CCTGGGGGATGGGAGGCCCGCGTTAGCGGGCGGGAGGGTTTCGAGAAGGGGGGGCACCCCTT<br/> TCGGCGTGCAGCGTACCGCGCACAGGGCGCAGCCCTGGTTAAAAACAAGGTTTATAAATATTGGT<br/> TAAAAAGCAGGTTAAAAAGACAGGTTAGCGGTGGCCGAAAAACGGGCGGAAACCCCTTGCAATGT<br/> GGATTTTCTGCCTGTGGACAGCCCTCAAATGTCAATAGGTGCGCCCTCATCTGTGACGACTCTG<br/> CCCCCAAGTGTCAAGGATCGCGCCCCCTCATCTGTCACTAGTGCAGCCCTCAAGTGTCAATACCG<br/> CAGGGCACTTATCCCAGGCTTGTCCACATCATCTGTGGGAAACTCGCGTAAAAATCAGGCGTTTT<br/> GCCGATTTGCGAGGCTGGCCAGTCCACGTCGCCGGCCGAAATCGAGCCTGCCCTCATCTGTCA<br/> ACGCGCGCCGGGTGAGTCGGCCCCCTCAAGTGTCAACGTCGCGCCCTCATCTGTGAGTGGGGC<br/> AAGTTTTCCGCGAGGTATCCACAACCGCGCGGGTGTCTCGCACACGGCTCAGAGGATCCAGCG<br/> TTCTGGCGCGTTTGCAGGGCCATAGACGGCCGACGCCAGCGCGGAGGGCAACCAGCCGGTG<br/> AGCGTCGCAAAGGAGATCCTGATCTGACTGATGGGCTGCCTGTATCGAGTGGTGTATTTGTGCCG<br/> AGCTGCCGGTTCGGGAGCTGTTGGCTGGCTGGTGGCAGGATATATTGTGGTGTAAACAAATTGAC<br/> GCTTAGACAACCTAATAACACATTGCGGACGTTTTTAATGTACTGGGGTGGATGCAGTGGGCCCCA<br/> C</p> |
| <p>pTU-8</p> | <p>TCTGTGAAGACAAAACGGAATTCATATGGGAGTGAGACCGCAGCTGGCAGCAGAGGTTTGGCGA<br/> CTGAAAAGCGGGCAGTGAAGCGCAACGCAATTAATGTGAGTTAGCTCACTATTAGGCACCCAGG<br/> CTTTACACTTATGCTTCCGGCTCGTATGTTGTGTGGAATTGTGAGCGGATAACAATTTACACAG<br/> GAAACAGCTATGACCATGATTACGCAAGCTTGCATGCCTGCAGGTGCACCTATAGAGGATCCCCG<br/> GGTACCGAGCTCGAATTCAGTGGCCGTCGTTTTACAACGTCGTCAGTGGGAAAAACCTGGCGTTA<br/> CCCAACTAATCGCCTTGCAGCACATCCCCCTTTCGCCAGCTGGCGTAATAGCGAAGAGGGCCCGC<br/> ACCTATCGCCCTTCCCAACAGTTGCGCAGCCTGAATGGCGAATGGCCGCTGATGCGGTATTTTCT<br/> CCTTACGCATCTGTGCGGTATTTACACCCGATATGGTGCATCTCAGTACAATCTGCTGTATGC<br/> CGCATAGTTAAGCCAGCCCCGACACCCGCAACACCCGCTGACGCGCCCTGACGGGCTTGTCTGC<br/> TCCCGGCATCCGCTACAGACAAGCTGTGACGGTCTCACGCTCTTCTGTCTTCTGCACGAAGTGG<br/> TTAAACTATCAGTGTGTTGACAGGATATATTGGCGGGTAAACCTAAGAGAAAAAGAGCGTTATTAG<br/> AATAATCGGATATTTAAAAAGGCGGTGAAAAGGTTTTATCCGTTTCGTTCCATTTAGTGTGATGCCA<br/> CCACAGGGTTCCCAGATCAGGCGCTGGCTGCTGAACCCCGAGCCGGAATGACCCCAACAGGCC<br/> CTAGCGTTTGC AATGCACCAGGTCATCATTGACCCAGGCGTGTCCACCAGGCCGCTGCCTCGCA</p>                                                                                                                                                                                                                                                                                                                                                                                                                                                                                                                                                                                                                                                                                                                                                                                                                                                                                                                                                                                                                                                                                                                                                                                                                                                                                                                                                                                                                                                                                                                                                                                                                                                                                                                                                                                                                                                                                                                                                                                                                                                                                                                                                                                                                                                                                                                                                                                                                                                                                                                                                                                                                                                                                                                                                                                                                                                                                                                                                                                                                                                                                                                                                                                                                                                                                                                                                                                                                                                                                                                                                                   |

|              |                                                                                                                                                                                                                                                                                                                                                                                                                                                                                                                                                                                                                                                                                                                                                                                                                                                                                                                                                                                                                                                                                                                                                                                                                                                                                                                                                                                                                                                                                                                                                                                                                                                                                                                                                                                                                                                                                                                                                                                                                                                                                                                                                                                                                                                                                                                                                                                                                                                                                                                                                                                                                                                                                                                                                                                                                                                                                                                                                                                                                                                                                                                                                                                                                                                                                                                                                                                                                                                                                                                                                                                                                                                                                                                                                                                                                                                                                                                                                                                                                                                                                                                                                                                                                                                                                                                                                                                                                                                                                                                                |
|--------------|--------------------------------------------------------------------------------------------------------------------------------------------------------------------------------------------------------------------------------------------------------------------------------------------------------------------------------------------------------------------------------------------------------------------------------------------------------------------------------------------------------------------------------------------------------------------------------------------------------------------------------------------------------------------------------------------------------------------------------------------------------------------------------------------------------------------------------------------------------------------------------------------------------------------------------------------------------------------------------------------------------------------------------------------------------------------------------------------------------------------------------------------------------------------------------------------------------------------------------------------------------------------------------------------------------------------------------------------------------------------------------------------------------------------------------------------------------------------------------------------------------------------------------------------------------------------------------------------------------------------------------------------------------------------------------------------------------------------------------------------------------------------------------------------------------------------------------------------------------------------------------------------------------------------------------------------------------------------------------------------------------------------------------------------------------------------------------------------------------------------------------------------------------------------------------------------------------------------------------------------------------------------------------------------------------------------------------------------------------------------------------------------------------------------------------------------------------------------------------------------------------------------------------------------------------------------------------------------------------------------------------------------------------------------------------------------------------------------------------------------------------------------------------------------------------------------------------------------------------------------------------------------------------------------------------------------------------------------------------------------------------------------------------------------------------------------------------------------------------------------------------------------------------------------------------------------------------------------------------------------------------------------------------------------------------------------------------------------------------------------------------------------------------------------------------------------------------------------------------------------------------------------------------------------------------------------------------------------------------------------------------------------------------------------------------------------------------------------------------------------------------------------------------------------------------------------------------------------------------------------------------------------------------------------------------------------------------------------------------------------------------------------------------------------------------------------------------------------------------------------------------------------------------------------------------------------------------------------------------------------------------------------------------------------------------------------------------------------------------------------------------------------------------------------------------------------------------------------------------------------------------------------------------|
|              | <p>ACTCTTCGCAGGCTTCGCCGACCTGCTCGCGCCACTTCTTACGCGGGTGGAATCCGATCCGCAC<br/> ATGAGGCGGAAGGTTTCCAGCTTGAGCGGGTACGGCTCCCGGTGCGAGCTGAAATAGTCGAACAT<br/> CCGTCGGGCGGTCGGCGACAGCTTGGGTAATCTTCCCATATGAATTCGTGTAGTGGTCCGCAC<br/> CAAACAGCACGACGATTCTCTCGTACAGGCTGGCAACGGGACGTTTCTTGGCCACGGTCC<br/> AGGACGCGGAAGCGGTGCAGCAGCGACACCGATTCCAGGTGCCAACGCGGTCCGACGTGAAGC<br/> CCATCGCCGTCGCTGTAGGCGCGACAGGCATTCTCGGCCCTCGTGTAAATACCGGCCATTGATC<br/> GACCAGCCCAGGTCCTGGCAAAGCTCGTAGAACGTGAAGGTGATCGGCTCGCCGATAGGGGTGC<br/> GCTTCGCGTACTCCAACACCTGCTGCCACACAGTTCGTATCGTCCGCCCCGAGCTCGACGCGG<br/> GTGTAGGTGATCTTACGTCCTTGTGACGTGGAATAATGACCTTGTTTTGCAGCGCCTCGCGCGG<br/> GATTTTCTTGTGCGCGTGGTGAACAGGGCAGAGCGGGCCGTGTCGTTTGGCATCGCTCGCATCG<br/> TGTCGGGCCACGGCGCAATATCGAAACAAGGAAAGTGCATTTTCTTGTATCGTCTGCTTCTGTTG<br/> TCAGCAACGCGGCTGCTTGGCCTCGCTGACCTGTTTTTGGCAGGTCCTCGCCGGCGTTTTTCGCT<br/> TCTTGGTCGTCATAGTTCCTCGCGTGTGATGGTTCATCGACTTCGCCAAACCTGCCGCTCTGTT<br/> CAAGACGACGCGAACGCTCCACGGCGGCCGATGGCGCGGGCAGGGCAGGGGGAGCCAGTTGCAC<br/> GCTGTGCGGCTCGATCTTGGCCGTAGCTTGTGTTGACCATCGAGCCGACGGACTGGAAGGTTTCGC<br/> GGGCGCACGCGATGACGGTGGCGCTTGGCATGGTTTTCGGCATCTCGCGGAAAAACCCCGCGTC<br/> GATCAGTCTTGCCTGTATGCCTTCCGGTCAAACGTCGGATTTCATTACCTTCCCTTGCAGGATTG<br/> CCCGACTCACGCCGGGCAATGTGCCCTTATTCTGATTTGACCCGCTGGTGCCTTGGTGTCCA<br/> GATAATCCACCTTATCGGCAATGAAGTCGGTCCCGTAGACCGTCTGGCCGCTCTTCTCGTACTTGG<br/> TATTCGAATCTTGGCCTGCACGAATACCAGCGACCCCTTGGCCAAATACTTGGCGTGGGCTCGG<br/> CCTGAGGCAAAAACACTGTATGCGGAAGAAGTGGTGGTGGTGGTGGTGGTGGTGGTGGTGGTGGT<br/> CGCCACATCTAGGATCTGCCAGGAACCGTAAAAAGGCCGCGTTGCTGGCGTTTTTCCATAGGCTC<br/> CGCCCCCTGACGAGCATCAAAAAATCGACGCTCAAGTCAGAGGTGGCGAAACCCGACAGGACT<br/> ATAAAGATAACAGGCGTTTTCCCTGGAAGCTCCCTCGTGGCTCTCTGTTCGACCCCTGCCGCT<br/> TACCGATACCTGTCGCTTCTCCCTTCCGTTCCGGAAGCGTGGCGCTTCTCATAGTACAGTGTAG<br/> GTATCTCAGTTCGGTGTAGGTCGTTGCTCCAAGCTGGGCTGTGTGCAGAAACCCCGTTTCCAGC<br/> CCGACCGCTGCGCTTATCCGGTAACATATCGTCTTGTAGTCCAACCCGTAAGACACGACTTATCGC<br/> CACTGGCAGCAGCCACTGGTAAACAGGATTAGCAGAGCGAGGTATGTAGGCGGTGCTACAGAGTTC<br/> TTGAAGTGGTGGCTAACTACGGCTACACTAGAAGACAGTATTGGTATCTGCGCTTGTGAA<br/> GCCAGTTACCTTCGGAAGGAGTTGGTAGCTTGTATCCGGCAAAACAAACCCGCTGGTAGCG<br/> GTGGTTTTTTTGTGTTGCAAGCAGCAGATTACGCGCAGAAAAAAGGATCTCAAGAAGATCCTTTGA<br/> TCTTTTACGGGGTCTGACGCTCAGTGGAAACGAAACTCACGTTAAGGGATTTTGGTCAATGAGAT<br/> TATCAAAAAGGATCTTCACTAGATCTTTTAAATAAAAATGAAGTTTTAAATCAATCAAAAGTAT<br/> ATATGAGTAAACTTGGTCTGACAGTTACCAATGCTTAAATCAGTGAAGCAGTATCTCAGCGATCTG<br/> TCTATTTGCTTATCCATAGTTGCCTGACTCCCGTCTGTAGATAACTACGATACGGGAGGGCTT<br/> ACCATCTGGCCCCAGTGCTGCAATGATACCGCGAGAACCACGCTCACCGGCTCCAGATTATCAG<br/> CAATAAACAGCCAGCCGGAAGGGCCGAGCGCAGAAGTGGTCTGCAACTTTATCCGCTCCATC<br/> CAGTCTATAATTGTTGCCGGAAGCTAGAGTAAAGTGGTGGTGGTGGTGGTGGTGGTGGTGGTGGT<br/> GTTGCCATTGCTACAGGCATCGTGGTGTACGCTCGTCTGTTGGTATGGCTTCAATCAGCTCCGGT<br/> TCCCAACGATCAAGGCGAGTTACATGATCCCCATGTTGTGCAAAAAAGCGTTAGCTCCTTCGGT<br/> CCTCCGATCGTTGTCAGAAGTAAGTTGGCCGAGTGTATCACTCATGGTTATGGCAGCACTGCAT<br/> AATCTCTTACTGTATGCCATCCGTAAGATGCTTTTCTGTGACTGGTGGTGGTGGTGGTGGTGGTGGT<br/> TTCTGAGAATAGTGTATGCGGCGACCGAGTTGCTCTTGGCCGGCGTCAATACGGGATAATACCGC<br/> GCCACATAGCAGAACTTAAAAAGTGTCTATCATTGAAAAAGTCTTTCGGGGCGAAAACTCTCAAG<br/> GATCTTACCGCTGTTGAGATCCAGTTCGATGTAACCCACTCGTGCACCCAACTGATCTTACGATC<br/> TTTTACTTACCAGCGTTTCTGGGTGAGCAAAAACAGGAAGGCAAAATGCCGCAAAAAAGGGAA<br/> TAAGGGCGACACGGAATGTTGAATACTCATACTCTTCTTTTCAATATTATGAAGCATTTATCA<br/> GGGTTATTGTCTCATGAGCGGATACATATTTGAATGTATTTAGAAAAATAAACAATAGGGGTTCC<br/> GCGACGAATTGGCCAGCGCTGCCATTTTTGGGGTGAGGCCGTTTCGCGGCCGAGGGGCGCAGCC<br/> CCTGGGGGATGGGAGGCCCGCTTAGCGGGCGGGAGGGTTGAGAAGGGGGGGGCAACCCCTT<br/> TCGGCGTGCAGCGTACGCGCACAGGGCGCAGCCCTGGTTAAAAAACAAAGTTTATAAATTTGTT<br/> TAAAAAGCAGGTTAAAAAGCAGGTTAGCGGTGGCCGAAAAACGGGGCGGAAACCCCTTGCAATGCT<br/> GGATTTTCTGCCTGTGGACAGCCCTCAAATGTCAATAGGTGCGCCCTCATCTGTGACACTCTG<br/> CCCCAAGTGTCAAGGATCGGCCCTCATCTGTGACTAGTTCGCGCCCTCAAGTGTCAATACCC<br/> CAGGCACTTATCCCCAGGCTTGTCCACATCATCTGTGGGAAACTCGCTGAAATAACTGAGCGTTT<br/> GCCGATTTGCGAGGCTGGCCAGCTCCACGTCGCCGGCCGAAATCGAGCCTGCCCTCATCTGTCA<br/> ACGCCGCGCCGGGTGAGTCGGCCCTCAAGTGTCAACGTCGCCCTCATCTGTGACTGAGGGCC<br/> AAGTTTTCCGCGAGGTATCCACAACGCCGGCCGCGCGGTGCTCGCACACGGCTTCGACGGCGT<br/> TCTACCGCGCTTTCAGAGGCCATAGACGGCCGACGCCAGCCAGCGGCGAGGGCAACCCAGCCGGT<br/> AGCGTCGCAAAAGGAGATCTGATCTGACTGATGGGCTGCCTGTATCGAGTGGTGGTGGTGGTGGT<br/> AGCTGCCGGTCCGGGAGCTGTTGGCTGGTGGTGGCAGGATATATTGGGTGTAACAAATTGAC<br/> GCTTAGACAACCTAATAACACATTGCGGACGTTTTTAAATGTACTGGGGTGGATGCAGTGGGCCCCA<br/> C</p> |
| <p>pTU-9</p> | <p>CTGTGAAAGACAACCTTCGAATTCATATGGGAGTGAGACCGCAGCTGGCAGCAGAGGTTGCCGA<br/> CTGGAAAGCGGGCAGTGAGCGCAACGCAATTAATGTGAGTTAGCTCACTCATTAGGCACCCAGG<br/> CTTTACACTTTATGCTTCCGGCTCGTATGTTGTGGAAATTGTGAGCGGATAACAATTTACACAG<br/> GAAACAGCTATGACCATGATTACGCCAAGCTTGCATGCCTGCAGGTCGACTCTAGAGGATCCCCG<br/> GGTACCGAGCTCGAATTCAGTGCCTGTTTTACAACGTCGTGACTGAGGAAAAACCCCTGGCGTTA<br/> CCCAACTTAATCGCTTGCAGCACATCCCCCTTTCGCCAGCTGGCGTAATAGCGAAGAGGGCCGC<br/> ACCGATCGCCCTTCCCAACAGTTGCGCAGCCTGAATGGCGAATGGCGCCTGATGCGGTATTTCT<br/> CCTTACGCATCTGTGCGGTATTTACACCCGATATGGTGCATCTCAGTACAATCTGCTGTGATGC<br/> CGCATAGTTAAGCCAGCCCGACACCCGCAACCCGCTGACGCGCCCTGACGGGCTTGTCTGC<br/> TCCCGGCATCCGCTTACAGACAAGCTGTGACGGTCTCACGCTAGACTTGTCTTCTGCACGAAGTG<br/> GTTTAACTATCAGTGTGTTGACAGGATATATTGGCGGGTAAACCTAAGAGAAAAGAGCGTTTATTA<br/> GAATAATCGGATATTTAAAAAGGGCGTGAAGGGTTTATCCGTTCTGCTCAATTTGTATGTGATGCCA<br/> ACCACAGGTTTCCCGATCAGGCGCTGGCTGTGAACCCCGAGCCGGAACCCAGCCGCAAGGCG<br/> CCTAGCGTTTGAATGCACAGGTCATCATTGACCCAGGCGTGTCCACCAGGCCGCTGCCTCGC<br/> AACTCTTCGAGGCTTCGCCGACCTGCTCGGCCACTTCTTACGCGGGTGGAAATCCGATCCGCA</p>                                                                                                                                                                                                                                                                                                                                                                                                                                                                                                                                                                                                                                                                                                                                                                                                                                                                                                                                                                                                                                                                                                                                                                                                                                                                                                                                                                                                                                                                                                                                                                                                                                                                                                                                                                                                                                                                                                                                                                                                                                                                                                                                                                                                                                                                                                                                                                                                                                                                                                                                                                                                                                                                                                                                                                                                                                                                                                                                                                                                                                                                                                                                                                                                                                                                                                                                                                                                                                    |

|                                      |                                                                                                                                                                                                                                                                                                                                                                                                                                                                                                                                                                                                                                                                                                                                                                                                                                                                                                                                                                                                                                                                                                                                                                                                                                                                                                                                                                                                                                                                                                                                                                                                                                                                                                                                                                                                                                                                                                                                                                                                                                                                                                                                                                                                                                                                                                                                                                                                                                                                                                                                                                                                                                                                                                                                                                                                                                                                                                                                                                                                                                                                                                                                                                                                                                                                                                                                                                                                                                                                                                                                                                                                                                                                                                                                                                                                                                                                                                                                                                                                                                                                                                                                                                                                                                                                                                                                                                                                                                               |
|--------------------------------------|-----------------------------------------------------------------------------------------------------------------------------------------------------------------------------------------------------------------------------------------------------------------------------------------------------------------------------------------------------------------------------------------------------------------------------------------------------------------------------------------------------------------------------------------------------------------------------------------------------------------------------------------------------------------------------------------------------------------------------------------------------------------------------------------------------------------------------------------------------------------------------------------------------------------------------------------------------------------------------------------------------------------------------------------------------------------------------------------------------------------------------------------------------------------------------------------------------------------------------------------------------------------------------------------------------------------------------------------------------------------------------------------------------------------------------------------------------------------------------------------------------------------------------------------------------------------------------------------------------------------------------------------------------------------------------------------------------------------------------------------------------------------------------------------------------------------------------------------------------------------------------------------------------------------------------------------------------------------------------------------------------------------------------------------------------------------------------------------------------------------------------------------------------------------------------------------------------------------------------------------------------------------------------------------------------------------------------------------------------------------------------------------------------------------------------------------------------------------------------------------------------------------------------------------------------------------------------------------------------------------------------------------------------------------------------------------------------------------------------------------------------------------------------------------------------------------------------------------------------------------------------------------------------------------------------------------------------------------------------------------------------------------------------------------------------------------------------------------------------------------------------------------------------------------------------------------------------------------------------------------------------------------------------------------------------------------------------------------------------------------------------------------------------------------------------------------------------------------------------------------------------------------------------------------------------------------------------------------------------------------------------------------------------------------------------------------------------------------------------------------------------------------------------------------------------------------------------------------------------------------------------------------------------------------------------------------------------------------------------------------------------------------------------------------------------------------------------------------------------------------------------------------------------------------------------------------------------------------------------------------------------------------------------------------------------------------------------------------------------------------------------------------------------------------------------------------------|
|                                      | <p>CATGAGGCGGAAGGTTTCCAGCTTGAGCGGGTACGGCTCCCGGTGCGAGCTGAAATAGTCGAACA<br/> TCCGTGGGGCCGTGGCGACAGCTTGGCGTACTTCTCCCATATGAATTCGTGTAGTGGTCGCCA<br/> GCAAACAGCACGACGATTTCCTCGTCGATCAGGACCTGGCAACGGGACGTTTTCTTGCACGGTC<br/> CAGGACGCGGAAGCGGTGACGACGACACCGATTCCAGGTGCCAACGGCGCTCGCGGTGAAG<br/> CCCATCGCCGTGCGCTGTAGGCGCGACAGGCATTCTCGGCCTTCGTGTAATACCGGCCATTGAT<br/> CGACCAGCCCAGGTCCTGGCAAAGTCTGTAGAACGTGAAGGTGATCGGCTCGCCGATAGGGGTGC<br/> GCTTCGCGTACTCCAACACCTGCTGCCACACCGATTTCGTATCGTCGGCCCGCAGCTCGACGCGC<br/> GTGTAGGTGATCTTACGTCTTGTGACGTGGAAAAATGACCTTGTTTTGACAGCGCTCGCGCGG<br/> GATTTTCTTGTGCGCGTGGTGAACAGGGCAGAGCGGGCCGTGTGCTTTGGCATCGCTCGCATCG<br/> TGTCCGGCCACGGCGCAATATCGAACAAAGGAAAGCTGCATTTCCCTGATCTGCTGCTTCGTGTGT<br/> TCAGCAACGCGGCCCTGCTTGGCCTCGCTGACCTGTTTTGCCAGGTCCTCGCCGCGGTTTTTCGCT<br/> TCTTGGTCTCATAGTTCTCGGTGTCGATGGTTCATCGACTTCGCCAAACCTGCGCCCTCCTGTT<br/> CAAGACGACGCGAACGCTCCACGGCGGCCGATGGCGCGGGCAGGGCAGGGGGAGCCAGTTGCAC<br/> GCTGTGCGCTCGATCTTGGCCGTAGCTTGTGACCATCGAGCCGACGGACTGGAAGGTTTCGC<br/> GGGGCGACGCATGACGGTGCGGCTTGCATGGTTTCGGCATCCTCGGCGGAAAAACCCCGCTC<br/> GATCAGTTCTGCTGTATGCCTCCGGTCAAACGTCGATTCATTACCCTCCTTGCCTGGGATGTC<br/> CCCGACTACGCGGGGCAATGTGCCCTTATTCTGATTGACCCGCTGGTCTTCTGCGGTGCCA<br/> GATAATCCACCTTATCGGCAATGAAGTCGGTCCCGTAGACCGTCTGGCCGCTCTTCTCGTACTTGG<br/> TATCCGAATCTTGCCTGCACGAATACCAGCGACCCCTGCCCAAATACTTGCCTGGGGCTCGG<br/> CCTGAGAGCCAAAACACTTGATGCGGAAGAAGTCGGTGCCTCTGCTGTGCGCGCATCGTTG<br/> CGCCACATCTAGGATCTGCCAGGAACCTGAAACCTGAAACCTGTTGCTGGTCTTCCATAGGCTC<br/> CGCCCCCTGACGAGCATCAAAAAATCGACGCTCAAGTCAGAGGTGGCGAAACCCGACAGGACT<br/> ATAAAGATACCAGGCGTTTCCCCCTGGAAGCTCCCTCGTGGCTCTCTGTTCCGACCCTGCCGCT<br/> TACCGGATACCTGTCCGCTTTCTCCCTTCGGGAAGCGTGGCGCTTTCTCATAGCTCAGCTGTAG<br/> GTATCTCAGTTCGGTGTAGGTGCTTCCGTCGTTGAGTGGGCTGTGTGCAGCAACCCCGTTCAGC<br/> CCGACCGCTGCGCCTTATCCGGTAACTATCGTCTTGTAGTCCAACCCGGTAAAGACACGACTTATCGC<br/> CACTGGCAGCAGCCACTGGTAACAGGATTAGCAGAGCGAGGTATGTAGGCGGTGTACAGAGTTC<br/> TTGAAGTGGTGGCCCTAACTACGGCTACACTAGAAGGACAGTATTTGGTATCTGCGCTCTGCTGAA<br/> GCCAGTTACCTCGGAAAAAGAGTTGGTACTTGTATCCGGCAAACAAACCCGCTGTGATGCG<br/> GTGGTTTTTTGTTTGAAGCAGCAGATTACGCGCAGAAAAAAGGATCTCAAGAAGATCCTTTGA<br/> TCTTTTCTACGGGGTCTGACGCTCAGTGAACGAAAACCTCACGTTAAGGGATTTTGGTTCATGAGAT<br/> TATCAAAAAGGATCTTACCTAGATCCTTTAAATTAATAAATGAAGTTTAAATCAATCTAAAGAT<br/> ATATGAGTAAACTTGGTCTGACAGTTACCAATGCTTAATCAGTGAAGGACCTATCTCAGCGATCTG<br/> TCTATTTGTTTATCCATAGTTGCCCTGCTCCCGCTCGTGTAGATAAATCAGTACGCAACCCCGGCTT<br/> ACCATCTGGCCCCAGTGTGCAATGATACCGCGAGAACCACGCTCACCAGGCTCCAGATTTATCAG<br/> CAATAAACAGCCAGCCGGAAGGGCCGAGCGCAGAAGTGGTCTGCAACTTTATCCGCTCCATC<br/> CAGTCTATTAATTGTTGCCGGGAAGCTAGAGTAAGTTCGCCAGTTAATAGTTTGGCAGCCGTT<br/> GTTGCCATTGCTACAGGCATCGTGGTGTACGCTCGTCTGCTTGGTATGGCTTCTTACCTAGCTCCGGT<br/> TCCCAACGATCAAGGCGAGTTACATGATCCCCATGTTGTGCAAAAAAGCGGTTAGCTCCTTCGGT<br/> CCTCCGATCGTTGTGAGAAGTAAGTTGGCCGAGTGTATCACTCATGGTTATGGCAGCACTGCAT<br/> AATTTCTTACTGTATGCCATCCGTAAGATGCTTTTCTGTGACTGGTGTGACTCAACCAAGTCA<br/> TTCTGAGAATAGTGTATGCGGCGACCGAGTTGCTCTTGGCCGGCTCAATACGGGATAATACCCG<br/> GCCACATAGCAGAACTTTAAAAAGTGTCTATCATTGGAAAAAGTCTTTCGGGGCGAAAACTCTCAAG<br/> GATCTTACCGTGTGTGAGATCCAGTTCGATGTAACCCACTCGTGCACCCAACTGATCTTACGCATC<br/> TTTTACTTTTACCAGCGTTTCTGGGTGAGCAAAAACAGGAAGGCAAAATGCCGAAAAAAGGGAA<br/> TAAGGGCGACACGGAAATGTTGAATACTACTCTTCTTTTCAATATTATGAAGCATTTTCA<br/> GGTTTATTGCTCATGAGCGGATACATATTTGAATGTATTTAGAAAAATAAACAAATAGGGTTCC<br/> GCGCACGAATTGGCCAGCGCTGCCATTTTGGGGTGAAGCCGTTTCGCGGCCGAGGGGGCGAGCC<br/> CCTGGGGGGATGGGAGGCCCGCTTAGCGGGCCGGGAGGGTTCGAGAAGGGGGGGCACCCCCCT<br/> TCGGCTGCGCGGTACGCGCACAGGGCCGAGCCGTTAAAAACAAGTTTATAAATATTGGT<br/> TAAAAAGCAGGTTAAAAAGACAGGTTAGCGGTGCGCGAAAAACGGGCGGAAACCTTGAATGCT<br/> GGATTTTCTGCCTGTGGACAGCCCTCAAATGTCAATAGGTGCGCCCTCATCTGTGCAACTCTG<br/> CCCCTCAAGTGTCAAGGATCGCGCCCTCATCTGTGATGTCGCGCCCTCAAGTGTCAATACCC<br/> CAGGGCACTTATCCCCAGGCTTGTCCACATCATCTGTGGGAAACTCGCGTAAAACTCAGGCGTTTC<br/> GCCGATTTGCGAGGCTGGCCAGCTCCACGTCGCCGGCGGAAATCGAGTCTCCCTCATCTGTCA<br/> ACGCGCGCGCGGGTGTGTCGGCCCTCAAGTGTCAACGTCGCGCCCTCATCTGTGATGAGGGCC<br/> AAGTTTTCCGCGAGGTATCCACAACGCGCGCGCGCGGTGTCTGCACACGGCTTCGACGGCGT<br/> TTCTGGCGCGTTTGCAGGGCCATAGACGGCCGACCCAGCCGCGGAGGGCAACAGCCCGGTG<br/> AGCGTCGCAAAAGGAGATCCTGATCTGACTGATGGGCTGCCTGTATCGAGTGGTGGTATTGTTGTC<br/> AGCTGCGGCTCGGGGAGCTGTTGGCTGGTGGTGGCAGGATATATTGTTGTTAAACAAATTGAC<br/> GCTTAGACAACCTAATAACACATTGCGGACGTTTTTAATGTAAGTGGGTGGATGCAGTGGGCCCCA<br/> C</p> |
| <p><b>Destination<br/>vector</b></p> | <p>GGGATGGAACGACGCGTAACTCACGTTAAGGATTTTGGTTCATGAGCTTGGCCGTCCTCGTCAAG<br/> TCAGCGTAATGCTCTGCCAGTGTACAACCAATTAACCAATTCTGATTAGAAAACTCATCGAGCA<br/> TCAAATGAAACTGCAATTTATTCATATCAGGATTATCAATACCATATTTTTGAAAAAGCCGTTTCTG<br/> TAATGAAGGAGAAAACTCACCGAGGCAGTTCATAGGATGGCAAGATCCTGGTATCGGTTCGCGA<br/> TTCCGACTCGTCCAACATCAATAACAACCTATTAATTTCCCTCGTCAAAAAATAAGGTTATCAAGT<br/> AGAAATCAACATGAGTGAAGTCAATCCGTTGAGAATGGCAAAAAGTTATGCATTTCTTCCAGAG<br/> CTTGTTCACAGGCCAGCCATTACGCTCGTCAAAAATCACTCGCATCAACCAACCGTTATTCA<br/> TTCGTGATTGCGCCTGAGCGAGACGAAATACGCGATCGCTGTTAAAAGGACAATTACAAACAGGA<br/> ATCGAATGCAACCGGCGCAGGAACACTGCCAGCGCATCAACAATATTTTCACTGAAATCAGGATAT<br/> TCTTCAATACCTGGAATGCTGTTTTTCCGGGGATCGCAGTGGTGTGAGTAAACCATCATCAGGA<br/> GTACGGATAAAATGCTTGTGTTGCGAAAGAGGCATAAATCCGTCAGCCAGTTTGTGCTGACCATC<br/> TCATCTGTAACATCATTGGCAACGCTACCTTTGCCATGTTTCAGAAACAACCTTGGCGCATCGGGC<br/> TTCCCATACAAGCGATAGATTGTCGACCTGATTGCCGACATTATCGCGAGCCATTTATACCCA<br/> TATAAATCAGCATCCATGTTGAAATTAATCGCGCCCTCGACGTTTCCGTTGAAATATGGCTATA<br/> ACACCCCTTGTATTACTGTTTATGTAAGCAGACAGTTTTTATTGTTTCATGATGATATTTTTATCTT<br/> GTGCAATGTAACATCAGAGATTTTGGACACGGCCATGCTAGCTCCAGCAAAAGGCCAGGAACC</p>                                                                                                                                                                                                                                                                                                                                                                                                                                                                                                                                                                                                                                                                                                                                                                                                                                                                                                                                                                                                                                                                                                                                                                                                                                                                                                                                                                                                                                                                                                                                                                                                                                                                                                                                                                                                                                                                                                                                                                                                                                                                                                                                                                                                                                                                                                                                                                                                                                                                                                                                                                                                                                                                                                                                                                                                                                                                                                                                                                                                                                                                                                                                                                                                                                                                  |

GTAAAAAGGCCGCTTGTGGCGTTTTTCCATAGGCTCCGCCCCCTGACGAGCATCACAAAAAT  
CGACGCTCAAGTCAGAGGTGGCGAAACCCGACAGGACTATAAAGATACCAGGCGTTTTCCCCCTGG  
AAGTCCCTCGTGGCTCTCTGTCCGACCCCTGCCGTTACCGGATACCTGTCCGCTTTCTCCC  
TTCGGGAAGCGTGGCGTTTTCTCATAGCTCAGCTCAGCTGATGGTATCTCAGTTCGGTGTAGGCTTCC  
CTCCAAGCTGGGCTGTGTGCACGAACCCCGTTAGCCCGACCGCTGCGCCTTATCCGGTAACT  
ATCGTCTTGAGTCCAACCCGGTAAGACACGACTTATCGCCACTGGCAGCAGCCACTGGTAAACAGG  
ATTAGCAGAGCGAGGTATGTAGGCGGTGCTACAGAGTTCCTGAAGTGGTGGCCTAACTACGGCTA  
CACTAGAAGAACAGTATTTGGTATCTGCGCTCTGCTGAAGCCAGTTACCTTCGGAAAAAGAGTTGG  
TAGCTCTTGATCCGGCAAAACAAACACCGCTGGTAGCGGTGGTTTTTTTTGTTTGCAAGCAGCAGAT  
TACGCGCAGAAAAAAGGATCTCAAGAAGATCCTTTGATCTTTTCTACGGGGTCTGACGCTCAGTG  
GAACGAAAACTCACGTTAAGGGATTTTGGTCAAGAGATTACAAAAAGGATCTTACCTAGATATCT  
TTCTCGAGCTTTCGGAGTGAGACCGTACAGCTTGTCTGTAAGCGGATGCCGGGAGCAGACAAC  
CCGTCAGGGCGCGTCAGCGGGTGTGGCGGGTGTGGGGCTGGCTTAACTATGCGGCATCAGAG  
CAGATTGACTGAGAGTGCACCATATGCGGTGTGAAATACCGCACAGATGCGTAAGGAGAAAAATA  
CCGCATCAGGCGCCATTCCGCAATCAGGCTGCGCAACTGTTGGGAAGGGCGATCGGTGCGGGCCT  
CTTCGCTATTACGCCAGCTGGCGAAAGGGGATGTGCTGCAAGGCGATTAAGTTGGGTAAACGCCA  
GGGTTTTCCAGTACGACGCTTGTAAAACGACGGCCAGTGAATTCGAGCTGCCGATCCCGGGATC  
CTCTAGAGTCGACCTGCAGGCATGCAAGCTTGGCGTAATCATGGTCATAGCTGTTTCTGTGTGAA  
ATTGTTATCCGCTCACAATTCCACACAACATACGAGCCGGAAGCATAAAGTGTAAAGCCTGGGGT  
GCCTAATGAGTGAGCTAACTCACATTAATTGCGTTCGCTCACTGCCCGCTTCCAGTCGGCAAAC  
CTGTCTGCCAGCTGCGGTCTCAGCTTGTCTTCTGGTGCAGTACCTGACCTGACCTGACCTGAC  
CGGTCTGCCAATCCGACGGAGGTTTATGAATTTCCACCTTTTCCACAAGCTCAACTAGTATTAAC  
GATGTGGATTTAGCAAAAAAACCTGTAACCCTAAATGTAATAAACGGGTAAAGCCTGCCAACCAT  
GTTATGGCAGATTAAGCGTCTTTTTGAAGGGCACCGCATCTTTCGCGTTGCCGTAATGTATCCGT  
TTATAAGGACAGCCGAATGACGGTCTGCGCAAAAAAACAGTTCATCTCAGCTGCGGATCTGCG  
GAGCAGTTACTGGCTGATATTGATCGACGCTTGTGATCAGTTATTGCCCGTGGAGGGAGAACGGGA  
TGTTGTGGGTGCCGCGATGCGTGAAGGTGCGCTGGCACCGGGAAAAACGTATTGCCCCATGTTGC  
TGTTGTGACCCCGCGATCTGGGTGCGCTGTGAGCCATGACGGATTACTGGATTTGGCCTGT  
GCGGTGGAATGGTCCACGCGGCTTGTGATCCTTGACGATATGCCATGACGATGCGGAA  
GCTGCGGCGCGGACGCCCTACCATTCTATTACGGAGAGCATGTGGCAATACTGGCGGCGG  
TTGCCCTGTGAGTAAAGCCTTTGGCGTAATTGCCGATGCAGATGGCTCACGCCGCTGGCAAAA  
AATCGGGCGGTTTTCTGAAGTGTCAAACGCCATCGGCATGCAAGGATTGGTTCAGGTCAGTTCAA  
GGATCTGTGTAAGGGGATAAGCCGCGCAGCGCTGAAGCTATTTGATGACGAATCACTTTAAAA  
CCAGCACGCTGTTTTGTGCTCCATGACGGTGGCTTGCATTGTTGCGAATGCCCTCAGGACAGCG  
CGTGATTGCCCTGCATCGTTTTTCACTTGATCTTGGTCAGGCATTTCAACTGCTGGACGATTTGACC  
GATGGCATGACCGACACCGGTAAGGATAGCAATCAGGACGCCGTAATCGACGCTGGTCAATCT  
TTAGGCCCCGAGGGCGGTTGAAGAACCCTGAGACAACATCTTCACTTGGCAGTGAGCATCTCT  
GTGCGGCTGCCAACAGGGGACGCCACTCAACATTTTATTAGGCGCTGTTGACAAAAAACCTCG  
CTGCCGTCAGTTAAGGATGCTGCATGAGCGCACATGCCCTGCCAAGGCAGATCTGACCGCCACC  
AGCCTGATCGTATCGGGCGGCATCATCGCCGCTTGGCTGGCCCTGCATGTGCATGCGCTGTGGTT  
TCTGGACGCAGCGGCGCATCCCATCTGGCGATCGCAAAATTTCTGGGGTGGCTGACCTGGCTGTCGG  
TCGGATTGTTATCATCGCGCATGACGCGATGACCGGGTGGTGGTGGCGGGGCGTCCGCGCGCC  
AATGCGGCGATGGGCCAGCTTGTCTGTGGCTGTATGCCGATTTTCTGGCGCAAGATGATCGT  
CAAGCACATGGCCATACCGCCATGCCGGAACCGACGACGACCCCGATTTCGACCATGGCGGCC  
CGGTCCGCTGGTACGCCCGCTTCACTCGGCACATTTTCGGCTGGCGCGAGGGGGCTGCTTCTGCC  
GTCATGTCAGCGTCTATGCGCTGATCCTTGGGATCGCTGGATGTACGTTATCTGGCCGCT  
GCCGTGATCCTGGCGTCGATCCAGCTGTTTCTGTTTCCGGCACCTGGCTGCCGCACCTGCCCGGCC  
ACGACGCGTTCGCCGACCGCCACAATGCGCGGTGCTCGCGGATCAGCGACCCCGTGTGCTGCTG  
ACCTGTTTTCACTTTGGCGGTTATCATCAGGAACACCCTGCACCCGACGGTGGCGTGGTGGCG  
CTCGCCAGCACCCGACCAAGGGGGACACCGCATGAGTGACTTAAGTGGGAGCGGCTATGCCAAC  
CGCATTATGATCTGATCTCGTGGGGGCTGGACTCGCAATGGCCTTATCGCCCTGCGCATTTAG  
CAGCAGCAACCTGATATGCGTATTTTGCTTATCGACGCCGCACCCAGGCGGGCGGGAATCATA  
GTGGTCATTTACCACGATGATTTGACTGAGAGCCAACATCGTTGGATAGCTCCGCTGGTGGTTCA  
TCACTGGCCCGACTATCAGGTACGCTTTCCACACCGCGCTCGTAAGCTGAACAGCGGCTACTTTTG  
TATTACTCTCAGCGTTTTGCTGAGGTTTTACAGCGACAGTTTTGGCCCGACTTGGGATGGATA  
CGCGGTGCGAGAGGTTAATGCGGAATCTGTTGCGTTGAAAAAGGGTCAGGTTATCGGTGCCCGCG  
CGGTGATTGACGGGCGGGGTTATGCGGCAAATTCAGCACTGAGCGTGGGCTTCCAGGCGTTTATT  
GGCCAGGAATGGCGATTGAGCCACCGCATGGTTTTATCATCTCCATTATCATGGATGCCACGGT  
CGATCAGCAAAATGGTTATCGCTTCTGTTACAGCTGCGCTTCCGCGGACCAAGATTGTTAATTGA  
AGATACGCACTATATTGATAATGCGACATTAGATCCTGAATGCGCGCGGCAAAAAATTTGCGACTA  
TGCCGCGCAACAGGGTTGGCAGCTTACAGACTGCTGCGGAGAAGAACAGGGCGCCTTACCCTA  
CTCTGTCCGGCAATGCCGACCGATTCTGGCAGCAGCGCCCTGGCCTGTAGTGGATTACGTGCC  
GGTCTGTTCCATCCACCGGCTATTCACTGCCGCTGGCGGTTGCCGCGGCGCCGCTGAG  
TGCATTTGATGCTTTACGTCGGCTCAATCACCATGCCATTACGCATTTTGGCCGCGAGCGCTG  
GCAGCAGCAGGGCTTTTTCCGATGCTGAATCGCATGCTGTTTTAGCCGGACCCGCGGATTAC  
GCTGGCGGGTTATGCAGCGTTTTTATGGTTTTACCTGAAGATTAATTTGCCCGTTTTTATGCCGGAA  
AACTCAGCTGACCGATCGGCTACGTAATCTGAGCGGCAAGCCGCTGTTCCGGTATTAGCAGCA  
TTGCAAGCCATTATGACGACTCATCGTTAAAGAGCGACTACATGAAAAACCAACTCAGGATTTGGTG  
CAGGCTTCCGTGGCCTGGCACTGGCAATTCGTTACAAGCTGCGGGGATCCCGCTTACTGCTT  
GAACAACGTGATAAACCCGCGGTCGGGCTTATGTCTACGAGGATCAGGGGTTTACCTTTGATGC  
TAAAAGAGTATGTCGAAGTGTGCGGTTACCGGTTTTTACCCTGTTGGGATCAGGGAAG  
GTCTTTAATTACGATAACGATCAAACCCGGCTCGAAGCGCAGATTACAGAGTTTAAATCCCGCGAT  
GTCGAAGGTTATCGTCAGTTTCTGGACTATTACGCGCGGTTTAAAGAAGGCTATCTAAAGCTC  
GGTACTGTCCCTTTTTTATCGTTTACAGACATGCTTCCGCGCCGACCTCAACTGGCGAAACTGCAG  
GCATGGAGAAGCGTTTACAGTAAGGTTGCCAGTTACATCGAAGATGAACATTCGCCACGCGT  
TTCTTTCCACTCGCTGTTGGTGGGCGGCAATCCCTTCGCCACCTCATCATTATACGTTGATACA  
CGCGCTGGAGCGTGAGTGGGGCGTCTGGTTTTCCGCTGGCGGCACCGCGCATTAGTTACGGGG

|         |                                                                                                                                                                                                                                                                                                                                                                                                                                                                                                                                                                                                                                                                                                                                                                                                                                                                                                                                                                                                                                                                                                                                                                                                                                                                                                                                                                                                                                                                                                                                                                                                                                                                                                                                                                                                                                                                                                                                                                                                                                                                                                                                                                                                                                                                                                                                                                                                                                                                                                                                                                                                                                                                                                                                                                                                                                                                                                                                                                                                                                                                                                                                                                                                                                                                                                                                                                                                                                                                                                                                                                                      |
|---------|--------------------------------------------------------------------------------------------------------------------------------------------------------------------------------------------------------------------------------------------------------------------------------------------------------------------------------------------------------------------------------------------------------------------------------------------------------------------------------------------------------------------------------------------------------------------------------------------------------------------------------------------------------------------------------------------------------------------------------------------------------------------------------------------------------------------------------------------------------------------------------------------------------------------------------------------------------------------------------------------------------------------------------------------------------------------------------------------------------------------------------------------------------------------------------------------------------------------------------------------------------------------------------------------------------------------------------------------------------------------------------------------------------------------------------------------------------------------------------------------------------------------------------------------------------------------------------------------------------------------------------------------------------------------------------------------------------------------------------------------------------------------------------------------------------------------------------------------------------------------------------------------------------------------------------------------------------------------------------------------------------------------------------------------------------------------------------------------------------------------------------------------------------------------------------------------------------------------------------------------------------------------------------------------------------------------------------------------------------------------------------------------------------------------------------------------------------------------------------------------------------------------------------------------------------------------------------------------------------------------------------------------------------------------------------------------------------------------------------------------------------------------------------------------------------------------------------------------------------------------------------------------------------------------------------------------------------------------------------------------------------------------------------------------------------------------------------------------------------------------------------------------------------------------------------------------------------------------------------------------------------------------------------------------------------------------------------------------------------------------------------------------------------------------------------------------------------------------------------------------------------------------------------------------------------------------------------------|
|         | <p>ATGATAAAGCTGTTTCAGGATCTGGGTGGCGAAGTCGTGTTAAACGCCAGAGTCAGCCATATGGA<br/> AACGACAGGAAACAAGATTGAAGCCGTGCATTTAGAGGACGGTCGAGGTTCCCTGACGCAAGCCG<br/> TCGCGTCAAATGCAGATGTGGTTACATACCTATCGCGACCTGTTAAGCCAGCACCTGCCGCGGTTA<br/> AGCAGTCCAACAACACTGCAGACTAAGCGCATGAGTAACTCTGTTTGTGCTCTATTTTGGTTGA<br/> ATCACCATCATGATCAGCTCGCGCATCACACGGTTTGTTCGGCCCCGCTTACCGCGAGCTGATTG<br/> ACGAAATTTTAAATCATGATGGCCTCGCAGAGGACTTCTCACTTTATCTGCACGCGCCCTGTGTCA<br/> CGGATTCGTCACCTGGCGCCTGAAGGTTGCGGCAGTTACTATGTGTTGGCGCCGGTGCCGCATTTA<br/> GGCACCGCAACCTCGACTGGACGGTTGAGGGGCCAAAACACTACGCGACCGTATTTTTCGGTACCT<br/> TGAGCAGCATTACATGCCTGGCTTACGGAGTCAGCTGGTCACGCACCGGATGTTTACGCCGTTTG<br/> ATTTTCGCGACCAGCTTAATGCCTATCATGGCTAGCCTTTTCTGTGGAGCCCGTCTTACCCAGA<br/> GCGCCTGGTTTCGGCCGCATAAACCGCGATAAAAACCTACTAATCTCTACCTGGTCGGCGCAGGC<br/> ACGCATCCCGGCGCAGGCATTCTGGCGTTCATCGGCTCGGCAAAAAGCGACAGGTTTGATGCT<br/> GGAGGATCTGATTGAATAATCCGTCGTTACTCAATCATGCGGTCGAAAACGATGGCAGTTGGCTC<br/> GAAAAGTTTTCGACAGCCTCAAAGTTATTTGATGCAAAAACCGGCGCAGCGTACTGATGCTCTA<br/> CGCCTGGTGCCGCCATTGTGACGATGTTATTGACGATCAGACGCTGGGCTTTCAGGCCCGGCAGC<br/> CTGCCTTACAAACGCCCGAACAACGCTGTGATGCAACTGAGATGAAAACGCGCCAGGCCTATGCA<br/> GGATCCAGATGCACGAACCGCGGTTTCGGCTTTTCAGGAAGTGGCTATGGCTCAGTATATCGC<br/> CCCCGCTTACGCGTTTGTATCATCTGGAAGGCTTCGCCATGGATGTACGCGAAGCGCAATACAGCC<br/> AACTGGATGATACGCTCGCCTATTGCTATCACGTTGCAGGCGTGTTCGGCTGTATGATGGCGCAA<br/> ATCATGGGCGTGCCGGATAACGCCACGCTGGACCGCGCTGTGACCTTGGGCTGGCATTTCAGTT<br/> GACCAATATTGCTCGCGATATTGTGGACGATGCGGCTCGGCAAAAAGCGGCGCTGTTATCTGCGGCA<br/> GGCTGGAGCATGAAGGCTGAACAAAGAGAATTATGCGGCACCTGAAAACCGTCAGGCGCTGAGC<br/> CGTATCGCCCCGTCGTTTGGTGCAGGAAGCAGAACCTTACTATTTGTCTGCCACAGCCGGCCTGGC<br/> AGGGTTGCCCTCGGTTCCGCCTGGGCAATCGTACGGCGAAGCAGGTTTACCGGAAAATAGGTG<br/> TCAAAGTTGAACAGGCGGTCACGAAGCCTGGGATCAGCGGCGCTCAACGACCCAGCCCGGAAAA<br/> TTAACGCTGCTGTGGCCGCTCTGGTCAGGCCCTTACTTCCCGGATGCGGGCTCATCCTCCCCG<br/> CCCTGGCATCTCTGGCAGCGCCGCTCTAGCGCCATGTCTTCCCGAGCGTGCCTGAAGTTT<br/> GACAGGGGCGGCGCATAGAGGAAGCCAAAAGAAAACAACCTTCTTTGCCCTGACGGCGTGATG<br/> CATACGCTGGCGATTAGCAGAAGCAA</p>                                                                                                                                                                                                                                                                                                                                                                                                                                                                                                                                                                                                                                                                                                                                                                                                                                                                                                                                                                                                                                                                                                                                                                                                                                                                                                                                                                                                                                                                                             |
| pLink-1 | <p>GGGTACCGAGCTCGAATTCACCTGGCCGTCGTTTTACAACGTCGTGACTGGGAAAACCTGGCGTT<br/> ACCCAACCTAATCGCCTTGACGACATCCCCCTTTCGCCAGCTGGCGTAATAGCGAAGAGGCCCG<br/> CACCGATCGCCCTTCCCAACAGTTGCGCAGCCTGAATGGCGAATGGCGCCTGATGCGGTTATTT<br/> TCCTTACGCATCTGTGCGGTATTTACACCCGCATATGGTGCATCTCAGTACAATCTGCTCTGATG<br/> CCGCATAGTTAAGCCAGCCCCGACCCCCGCAACACCCGCTGACGCGCCCTGACGGGCTGTCTG<br/> CTCCCCGCATCCGCTTACAGACAAGCTGTGACCATCTCCGGGAGCTGCATGTGTCAGAGGTTTT<br/> ACCGTCATACCGAAACCGCGAGTCGAAAAGGGCCTCGTGATACGCCTATTTTATAGGTTAATGT<br/> CATGATAATAATGGTTTCTTAGACGTCAGGTGGCACTTTTCGGGAAAATGTGCGCGGAAACCCCTAT<br/> TTGTTATTTTTCTAAATACATTTCAAATATGTATCCGCTCATGAGACAATAACCTGATAAATGCT<br/> CAATAATATTGAAAAAGGAAGAGTATGCGCTCACGCAACTGGTCCAGAACCTTGACCGAACGCAG<br/> CGGTGGTAACGGCGCAGTGGCGGTTTTCATGGCTTGTATGACTGTTTTTTGGGGTACAGTCTAT<br/> GCCTCGGGCATCCAAGCAGCAAGCGGTTACGCCGTGGGTGCGATGTTTGTATGGAGCAGCA<br/> ACGATGTTACGCAGCAGGGCAGTGCCTTAAACAAAAGTTAAACATCATGAGGAAAGCGGTGATC<br/> GCCGAAGTATCGACTCAACTATCAGAGGTAGTTGGCGTTCATCGAGCGCCATCTCGAACCGGACGTT<br/> GCTGGCCGTACATTTGTACGGCTCCGCAGTGGATGGCGGCTGAAGCCACACAGTGATATTGATT<br/> TGCTGGTTACGGTGACCGTAAGGCTTGATGAAAACAACGCGGCGAGCTTGTATCAACGACCTTTG<br/> GAAACTTCGGCTTCCCCTGGAGAGAGCGAGATTCTCCGCGCTGTAGAAGTACCATTGTTGTGCA<br/> CGACGATCATTCGTTGGCGTTATCCAGCTAAGCGCAACTGCAATTTGGAGAAATGGCAGCGCA<br/> ATGACATTTCTGCAGGTATCTTCGAGCCAGCCACGATCGACATTGATCTGGCTATCTTGCTGACAA<br/> AAGCAAGAGAACATAGCGTTGCCCTTGGTAGGTCAGCGGCGGAGGAACTCTTGTATCCGGTTCT<br/> GAACAGGATCTATTTGAGGCGCTAAATGAAACCTTAAACGCTATGGAACCTCGCCGCCGACTGGGC<br/> TGGCGATGAGCGAAAATGTAGTGCTTACGTTGTCCCGCATTTGGTACAGCGCAATAACCGGAAAA<br/> TCGCGCCGAAGGATGTGCTGCCGACTGGGCAATGGAGCGCTGCCGGCCAGTATCAGCCCGTC<br/> ATACTGAAGCTAGACAGGCTTATCTTGGACAAGAAGAAGATCGCTTGGCCTCGCGCGCAGATCA<br/> GTTGGAAGAATTTGTCCACTACGTGAAAGCGGAGATCACCAAGGTATGCTCGGCAATAACTGTGCA<br/> ACCAAGTTTACTCATATATACTTTAGATTGATTTAAAACCTTCAATTTTAAATTTAAAGGATAGGT<br/> GAAGATCCTTTTTGATAATCTCATGACCAAAAATCCCTTAAACGTGAGTTTTCGTTCCACTGAGCGTC<br/> AGACCCCGTAGAAAAGTCAAAGGATCTTCTTGAGATCCTTTTTTCTGCGCGTAATCTGCTGCT<br/> GCAAAACAAAAAACACCGCTACCAGCGGTGGTTTTGTTTTGCCGGATCAAGAGCTACCAACTTTTT<br/> TCCAAAGGTAACCTGGCTTACGACAGCGCAGATACCAATACTGTCTTGTAGTGTAGCTGATG<br/> AGGCCACCACTTCAAGAACTCTGTAGCACCGCCTACATAACCTCGCTCTGCTAATCTGTTACCAGT<br/> GGCTGCTGCCAGTGGCGATAAGTCGTGCTTACCAGGTTGGACTCAAGACGATAGTTACCGGATA<br/> AGGCGCAGCGGTCCGGCTGAACGGGGGTTCTGTGCACACAGCCCAGCTTGGAGCAAGGACGACCTA<br/> CACCGAAGTACCTACAGCGTGAGCTATGAGAAAAGCGCCACGCTTCCCGAAGGAGGAAAGG<br/> CGGACAGGTATCCGGTAAGCGGCGAGGTCGGAACAGGAGAGCGCACAGGGAGCTTCCAGGGGG<br/> AAACGCCTGGTATCTTATAGTCTGTGCGGTTTCGCCACCTCTGACTTGAGCGTGCATTTTTGTG<br/> ATGCTCGTACGGGGGGCGGAGCCTATGAAAACCGCCAGCAACCGCGCTTTTTACGGTTCCCTGG<br/> CCTTTTGTGCTGGCTTTTTGCTCACATGTTCTTCTGCGTTATCCCCTGATCTGTGGATAACCGTAT<br/> TACCCCTTGTAGTGTGAGCTGATACCGCTCGCCGACGCCGAACGACCGGAGCGCAGCTGATG<br/> GCGAGGAAGCGGAAGAGCGCCCAATACGCAACCGCCTTCCCCGCGGTTGGCCGATTCAATTA<br/> TGCAGCTGGCAGCAGGTTTCCCGACTGGAAAAGCGGGCAGTGAGCGCAACGCAATTAATGTGAG<br/> TTAGTCACTCATTAGGCACCCAGGCTTTACACTTTATGCTTCCGGCTCGTATGTTGTGTTGAAAT<br/> TGTGAGCGGATAACAATTTACACAGGAAACAGCTATGACCATGATTACCGCAATGATGCTGCTGCT<br/> GCAGGTCGACTCTAGAGGATCCCCTTGAAGACAAGCAAGAGGATGCACATGTGACCGAGGGATTG<br/> TCTTCGTGGAACCTTGGGACTTCAAGTCCACCCCTTGAAGCGTGGAAAAGCCTTCCGACCAAGG<br/> GAAGTGTGGATGTAGAGGAAATGGAAGTTTGTCTCAGATGGGGACTTGTCTGATTGCTTTCAC<br/> AAGAATCCAGCTTATCGGTAACCGCAGAGGAAAGATTAGCTGCAATCAGGAAACCGCCGAGAG<br/> TGGATGTGGTCAAGAGTTAAAAGAACCTGCAGGAGACAGAAATCAATACTCAAACCTGCAGAA<br/> ACTTCTCAACAAGCTCCACAGGAAACACAGTAGGGAGGTGAAACACCAGGCCGCAAGAAAGC</p> |



|         |                                                                                                                                                                                                                                                                                                                                                                                                                                                                                                                                                                                                                                                                                                                                                                                                                                                                                                                                                                                                                                                                                                                                                                                                                                                                                                                                                                                                                                                                                                                                                                                                                                                                                                                                                                                                                                                                                                                                                                                                                                                                                                                                                                                                                                                                                                                                                                                                                                                                                                                                                                                                                                                                                                                                                                                                                                                                                                                                                                                                                                                                                                                                                                                                                                                                                                                                                                                                                                                                                                                                                                                                           |
|---------|-----------------------------------------------------------------------------------------------------------------------------------------------------------------------------------------------------------------------------------------------------------------------------------------------------------------------------------------------------------------------------------------------------------------------------------------------------------------------------------------------------------------------------------------------------------------------------------------------------------------------------------------------------------------------------------------------------------------------------------------------------------------------------------------------------------------------------------------------------------------------------------------------------------------------------------------------------------------------------------------------------------------------------------------------------------------------------------------------------------------------------------------------------------------------------------------------------------------------------------------------------------------------------------------------------------------------------------------------------------------------------------------------------------------------------------------------------------------------------------------------------------------------------------------------------------------------------------------------------------------------------------------------------------------------------------------------------------------------------------------------------------------------------------------------------------------------------------------------------------------------------------------------------------------------------------------------------------------------------------------------------------------------------------------------------------------------------------------------------------------------------------------------------------------------------------------------------------------------------------------------------------------------------------------------------------------------------------------------------------------------------------------------------------------------------------------------------------------------------------------------------------------------------------------------------------------------------------------------------------------------------------------------------------------------------------------------------------------------------------------------------------------------------------------------------------------------------------------------------------------------------------------------------------------------------------------------------------------------------------------------------------------------------------------------------------------------------------------------------------------------------------------------------------------------------------------------------------------------------------------------------------------------------------------------------------------------------------------------------------------------------------------------------------------------------------------------------------------------------------------------------------------------------------------------------------------------------------------------------------|
|         | TAAACGCCTAGCTGAAATCCAGGAGTCAATGAGAGCTGAAGGTGATGCCGAACCAAATGAAATAA<br>GCGGGGGCATGGGGGCAATACCCAGCAACGCCGAACCTCCTGGGCCAAA                                                                                                                                                                                                                                                                                                                                                                                                                                                                                                                                                                                                                                                                                                                                                                                                                                                                                                                                                                                                                                                                                                                                                                                                                                                                                                                                                                                                                                                                                                                                                                                                                                                                                                                                                                                                                                                                                                                                                                                                                                                                                                                                                                                                                                                                                                                                                                                                                                                                                                                                                                                                                                                                                                                                                                                                                                                                                                                                                                                                                                                                                                                                                                                                                                                                                                                                                                                                                                                                                    |
| pLink-2 | GGGGATCCTCTAGAGTCGACCTGCAGGCATGCAAGCTTGGCGTAATCATGGTCATAGCTGTTTTCC<br>TGTTGAAAATGTTATCCGCTCACAAATTCACACAAACATACGAGCCGGAAGCATAAAGTGAAAGC<br>CTGGGGTGCCTAATGAGTGAGCTAACTCACATTAATTGCGTTGCGCTCACTGCCCGCTTCCAGTC<br>GGGAAACCTGTCTGTCAGCTGCATTAATGAATCGGCCAACGCGCGGGGAGAGGGCGGTTGCGTA<br>TTGGGGCGCTTCCGCTTCCGCTCACTGACTCGCTGCGCTCGGTCGTTCCGGTGCGGCGAGCG<br>GTATCAGCTCACTCAAAGGCGGTAATACGGTTATCCACAGAATCAGGGGATAACGCAGGAAAAG<br>CATGTGAGCAAAAAGGCCAGCAAAAAGGCCAGGAACCGTAAAAAGGCCGCGTTGCTGGCGTTTTCC<br>ATAGGCTCCGCCCCCTGACGAGCATCACAAAAATCGACGCTCAAGTCAGAGGTGGCGAAACCCG<br>ACAGGACTATAAAGATAACAGCGTTTCCCCCTGGAAGCTCCCTCGTGCGCTCTCTGTTCCGACC<br>CTGCCGTTACCGGATACCTGTCCGCTTCTCCCTTCGGGAAGCGTGGCGCTTCTCATAGCTCA<br>CGCTGTAGGTATCTCAGTTCGGTGTAGGTCGTTCCGCTCCAAGCTGGGCTGAGTAAAGCAACCCC<br>CGTTCAGCCCGACCGCTGCGCTTATCCGGTAACATCGTCTTGAGTCCAACCCGGTAAGACACG<br>ACTTATCGCCACTGGCAGCAGCCACTGGTAACAGGATTAGCAGAGCGAGGTATGTAGGCGGTGCT<br>ACAGAGTCTTGAAGTGGTGGCCTAACTACGGCTACACTAGAAGGACAGTATTTGGTATCTGCGCT<br>CTGCTGAAAGCCAGTTACCTTCGGAAAAAGAGTTGGTAGCTCTTGATCCCGCAAAACAAACCCG<br>TGGTAGCGGTGGTTTTTTTTGTTTGCAAGCAGCAGATTACGCGCAGAAAAAAGGATCTCAAGAAG<br>ATCCTTTGATCTTTTCTACGGGGTCTGACGCTCAGTGGAACGAAAACTCACGTTAAGGGATTTTGG<br>TCATGAGATTATCAAAAAGGATCTTACCTAGATCCTTTTAAATTAATAAAGTTTTTAAATCAAT<br>CTAAAGTATATGAGTAAACTTGGCTGACAGTTATTTGCCGACTACCTGGTGAAGTTCGCCCTT<br>CACGTAGTGGACAAATCTTCCAAGTATCTGCGCGCAGGGCAAGCGATCTTCTTCTGTCCAAG<br>ATAAGCCTGTCTAGCTTCAAGTATGACGGGTGATACTGGGCGCGCAGGCGCTCCATTGCCCACT<br>CGGCAGCGACATCCTTCGGCGGATTTTGGCGGTTACTGCGCTGTACCAATGCGGGCAACCGTA<br>AGCACTAATTCGCTCATCGCCAGCCAGCTCGGGCGGAGTTCATGCGGTTAAGTTCATTTATT<br>AGCGCCTCAAATAGATCCTGTTTCAAGAACCGGATCAAAGAGTTCCTCCCGCGCTGGACCTACCA<br>GGCAACGCTATGTTCTTGTCTTTGTCAGCAAGATAGCCAGATCAATGTCGATCGTGGCTGGCTC<br>GAAGACACTGCAAGAAATGTCATTGCGCTGCCATTCTCAAATGTCAGTTCCGCTTAGCTGGATA<br>ACGCCACGGAATGATGTCGTGTCACAACAATGTTGACTTACAGCGCGGAGAATCTCGCTCT<br>CTCCAGGGAAAGCCGAAGTTTCCAAAAAGGCTTGTGATCAAAGCTCGCCGCGTTGTTTATCATAGC<br>CTTACGGTACCGTAACCAGCAAATCAATATCACTGTGTGGCTTACAGCCGCCATCCACTGCGGA<br>GCCGTACAAATGTACGGCCAGCAACGTCGGTTCGAGATGGCGCTCGATGACGCCAACTACCTCTG<br>ATAGTTGAGTCGATACTTCGGCGATCACCGCTTCCCTCATGATGTTTAACTTTGTTTTAGGGCGC<br>TGCCCTGTGCGTAAACATCGTTGCTGCTCATAACATCAAACATCGAACCCAGGCTAACCGCGCT<br>GCTGCTTGGATGCCCCGAGGCATAGACTGTACCCAAAAAAGCAGTCATAACAAGCCATGAAAACC<br>GCCACTGCGCCGTTACCACCGCTGCGTTCCGGTCAAGGTTCTGGACCAGTTGCGTGAGCGCATACT<br>CTTCTTTTCAATATTTAAGCATTTATCAGGGTTATTTGTTCTCATGAGCGGATACATATTTGAA<br>TGATTTGAAAAATAAACAATAATAGGGGTTCCGCGCACATTTCCCGGAAAGTGCACACTGACCTG<br>TAAGAAACCATTATTATCATGACATTAACCTATAAAAAATAGGCGTATCACGAGGCCCTTTCGACTC<br>GCGCGTTTCGGTGATGACGGTGAACCTCTGACACATGCAGCTCCCGGAGATGGTCACAGCTTG<br>TCTGTAAGCGGATGCCGGGAGCAGACAAGCCGTCAGGGCGCGTCAGCGGGTGTGGCGGGTGTG<br>CGGGCTGGCTTAACTATGCGGCATCAGAGCAGATTGTAAGAGTGTACTGAGAGTGCACATGCGGTG<br>AATACCGCACAGATGCGTAAGGAGAAAAATACCGCATCAGGCGCCATTCCGCCATTACAGGCTGCGCA<br>ACTGTTGGGAAGGGCGATCGGTGCGGGCCTCTTCGCTATTACGCCAGCTGGCGAAAGGGGGATGT<br>GCTGCAAGGGCATTAAAGTTGGGTAACGCCAGGGTTTTCCAGTCACGACGTTGTAACACGACGGC<br>CAGTGAATTCGAGCTCGGTACCTTTGAAGACAACTAGAGGATGCACATGTGACCGAGGGATTG<br>TCTTCGTGAAACTTGGGACTTCCAGATTCCACCCCTTGCAAGCGTGGAAAGCCTCCGCAAAAGG<br>GAAGTGTCCGATGTAGAGGAAATGGAAGTTTGTCTCAGATGGGGACTTGCTTGATTGCTTAC<br>AAGAATGCCAGCTTATGCGGTAACCGCAGAGGAAGATTTAGCTGCAATCAGGAAAAACGCCGAGA<br>TGGATGTCGGTCAAGAAGTTAAAGAACCTGCAGGAGACAGAAATCAATACTCAAACCTGCAGAA<br>ACTTTCCTCAACAAGCTCCACAGGAAACACAGTAGGGAGGTGAAACACTGACCAAGAAAGAAAGC<br>TAAACGCCTAGCTGAAATCCAGGAGTCAATGAGAGCTGAAGGTGATGCCGAACCAAATGAAATAA<br>GCGGGGGCATGGGGGCAATACCCAGCAACGCCGAACCTCCTGGGCCAAA |
| pLink-3 | GGGTACCGAGCTCGAATCACTGGCCGCTGTTTTACAACGTCGTCATGGGAAAAACCTGGCGTT<br>ACCAACTTAATCGCCTTGCAGCACATCCCCTTTCGCCAGCTGGCGTAAAGCGAAGAGGCCCG<br>CACCGATCGCCCTTCCAAACAGTTGCGCAGCCTGAATGGCGAATGGCGCCTGATGCGGTATTTTC<br>TCCTTACGCATCTGTGCGGTATTTACACCCGCATATGGTGCATCTCAGTACAATCTGCTCTGATG<br>CCGCATAGTTAAGCCAGCCCCGACCCGCCAACCCCGCTGACGCGCCCTGACGGGCTTGTCTG<br>CTCCCGCATCCGCTTACAGACAAGCTGTGACCATCCCGGGAGCTGCTATGTCAGAGGTTTTTC<br>ACCGTCATACCGAAACCGCGGAGTCGAAAAGGCCCTCGTGATACGCCTATTTTTATAGGTTAATGT<br>CATGATAAATAATGGTTTTCTTAGACGTCAGGTGGCACTTTTCGGGAAATGTGCGCGGAACCCCTAT<br>TTGTTATTTTTCTAAATACATTCAAATATGTATCCGCTCATGAGACAATAAACCCCTGATAAATGCTT<br>CAATAATATTGAAAAAGGAAGAGTATGCGCTACCGCAACTGGTCCAGAACCTTGACCGCAACGCAG<br>CGGTGGTAACGGCGCAGTGGCGGTTTTCATGGCTTGTATGACTGTTTTTTGGGGTACAGCTCTAT<br>GCCTCGGGCATCCAAGCAGCAAGCGGTTACGCCGTGGGTGATGTTTGTATGTTATGGAGCAGCA<br>ACGATGTTACGCAGCAGGGCAGTCGCCCTAAAAACAAAGTTAAACATCATGAGGGAAGCGGTGATC<br>GCCGAAGTATCGACTCAACTATCAGAGGTAGTTGGCGTATCGAGCGCCATCTCGAACCCGACGTT<br>GCTGGCCGTACATTGTACGGCTCCGAGTGGATGGCGCCTGAAGCCACACAGCTGATATTGAT<br>TGCTGGTTACGGTGACCGTAAGGCTTGTGAAACAACCGGGCAGCTTTGATCAACGACCTTTTG<br>GAAACTTCGGCTTCCCTGGAGAGAGCGAGATTCTCCGCGCTGTAGAAGTACCATTTGTTGTGCA<br>CGACGACATCATTCCGTGGCGTTATCCAGTAAAGCGCAACTGCAATTTGGAGAATGGCAGCGCA<br>ATGACATCTTGCAGGTATCTTGCAGCCAGCCAGTGCACATGATGCTGGTACTTGTGCTGACAA<br>AAGCAAGAGAACATAGCGTTGCCCTTGGTAGGTCCAGCGGGCGAGGAACTCTTTGATCCGGTTCCCT<br>GAACAGGATCTATTTGAGGCGCTAAATGAAACCTTAAACGCTATGGAATCGCCGCCCGACTGGGC<br>TGGCGATGAGCGAAATGTAGTGTACGTTGTCCGCTTTGGTACAGCGCAGTAACCGGCAAAA<br>TCAGCCGGAAGGATGTCGCTGCCGACTGGGCAATGGAGCGCTGCGGCCGACTGACGCTCAGCCGTC<br>ATACTGAAAGCTAGACAGGCTTATCTTGGACAAGAAGAAGATCGCTTGGCCTCGCGCGCAGATCA<br>GTTGGAAGAATTTGTCCACTACGTGAAAGGCCGAGATCACAAGGTAGTCGGCAATAACTGTCAG                                                                                                                                                                                                                                                                                                                                                                                                                                                                                                                                                                                                                                                                                                                                                                                                                                                                                                                                                                                                                                                                                                                                                                                                                                                                                                                                                                                                                                                                                                                                                                                                                                                                                                                                                                                                                               |

|                |                                                                                                                                                                                                                                                                                                                                                                                                                                                                                                                                                                                                                                                                                                                                                                                                                                                                                                                                                                                                                                                                                                                                                                                                                                                                                                                                                                                                                                                                                                                                                                                                                                                                                                                                                                                                                                                                                                                                                                                                                                                                                                                                                                                                                                                                                                                                                                                                                                                                                                                                                                                                                                                                                                                                                                                                                                                                                                                                                                                                                                                                                                                                                                                                                                                                                                                                                                                                                                                                                                                                                                                                                                                                     |
|----------------|---------------------------------------------------------------------------------------------------------------------------------------------------------------------------------------------------------------------------------------------------------------------------------------------------------------------------------------------------------------------------------------------------------------------------------------------------------------------------------------------------------------------------------------------------------------------------------------------------------------------------------------------------------------------------------------------------------------------------------------------------------------------------------------------------------------------------------------------------------------------------------------------------------------------------------------------------------------------------------------------------------------------------------------------------------------------------------------------------------------------------------------------------------------------------------------------------------------------------------------------------------------------------------------------------------------------------------------------------------------------------------------------------------------------------------------------------------------------------------------------------------------------------------------------------------------------------------------------------------------------------------------------------------------------------------------------------------------------------------------------------------------------------------------------------------------------------------------------------------------------------------------------------------------------------------------------------------------------------------------------------------------------------------------------------------------------------------------------------------------------------------------------------------------------------------------------------------------------------------------------------------------------------------------------------------------------------------------------------------------------------------------------------------------------------------------------------------------------------------------------------------------------------------------------------------------------------------------------------------------------------------------------------------------------------------------------------------------------------------------------------------------------------------------------------------------------------------------------------------------------------------------------------------------------------------------------------------------------------------------------------------------------------------------------------------------------------------------------------------------------------------------------------------------------------------------------------------------------------------------------------------------------------------------------------------------------------------------------------------------------------------------------------------------------------------------------------------------------------------------------------------------------------------------------------------------------------------------------------------------------------------------------------------------------|
|                | <p>ACCAAGTTTACTCATATATACTTTAGATTGATTTAAAACCTTCATTTTAAATTTAAAAGGATCTAGGT<br/> GAAGATCCTTTTTGATAATCTCATGACCAAATCCCTTAACGTGAGTTTTTCGTTCCACTGAGCGTC<br/> AGACCCCGTAGAAAAGATCAAAGGATCTTCTTGAGATCCTTTTTTTCTGCGCGTAATCTGCTGCTT<br/> GCAAAACAAAAAACCCGCTACCGCTACCGGTTGGTTTTGTTGCGGATCAAGAGCTTACCAACTTTTT<br/> TCCGAAGGTAAGTGGCTTACGAGAGCGCAGATACCAATACTGTCCTTCTAGTGTAGCCGTAGTT<br/> AGGCCACCCTCAAGAACTCTGTAGCACCCTACATACCTCGCTCTGCTAATCCTGTTACCAGT<br/> GGCTGCTGCCAGTGGCGATAAGTCGTGCTTACCGGGTTGGACTCAAGACGATAAGTTACCGGATA<br/> AGGCGCAGCGGTCGGGCTGAACGGGGGTTCTGTGCACACAGCCAGCTTGGAGCGAACGACCTA<br/> CACCGAACTGAGATACCTACAGCGTGAGCTATGAGAAAAGCGCCACGCTTCCCGAAGGGAGAAAAGG<br/> CGGACAGGTATCCGGTAAGCGGCAGGGTCGGAACAGGAGAGCGCACGAGGGAGCTTCCAGGGGG<br/> AAACGCCTGGTATCTTTATAGTCCTGTCGGGTTTCGCCACCTCTGACTTGAGCGTGCATTTTTGTG<br/> ATGCTCGTACGGGGGGCGGAGCCTATGAAAAACGCCAGCAACGCGGCTTTTTACGGTTCCTGG<br/> CCTTTTGCTGGCCTTTTTGCTCACATGTTCTTTCTGCGTTATCCCTGATTCTGTGGATAACCCTAT<br/> TACCGCCTTTGAGTGAGCTGATACCGCTCGCCGACGCCAAGCAGCCGAGCGCAGCGAGTCAAGTGA<br/> GCGAGGAAGCGGAAGAGCGCCCAATACGCAAACCGCCTTCCCCGCGGTTGGCCGATTCAATTA<br/> TGCAGCTGGCAGCAGGTTTCCGACTGGAAGCGGGCAGTGAAGCGCAACGCAATTAATGTAGT<br/> TTAGCTACTATTAGGCACCCAGCTTTACACTTTATGCTTCCGGCTCGTATGTTGTGGAAT<br/> TGTGAGCGGATAACAATTTACACAGGAAACAGCTATGACCATGATTACGCCAAGCTTGCATGCCT<br/> GCAGGTCGACTCTAGAGGATCCCTTTGAAGACAATTACGAGGATGCACATGTGACCGAGGATT<br/> GTCTTCGTGGAAACTTGGGACTTCAGATTCCACCCCTTGAAGCGTGGAAAGCTTCCGACCAAG<br/> GAAAGTCGGATGTAGAGGAAATGGAAGTTTGTCTCAGATGGGGACTTCTGTTGTTCA<br/> CAAGAATGCCAGCTTATGCGGTAAACGCAGAGGAAAGATTTAGCTGCAATCAGGAAAACGCCCGAG<br/> ATGGATGTCGGTCAAGAAGTAAAGAACCTGCAGGAGACAGAAATCAATACTCAAACCTGCAGA<br/> AACTTTCCTCAACAAGCTCCACAGGAAACACAGTAGGGAGGTGAAACACCGCCGCAAGAAAAG<br/> CTAAACGCTAGCTGAAATCCAGGAGTCAATGAGAGCTGAAGGTGATGCCGAACCAATGAAATA<br/> AGCGGGGGCATGGGGGCAATACCCAGCAACGCCGAACTTCCTGGGCCAAA</p>                                                                                                                                                                                                                                                                                                                                                                                                                                                                                                                                                                                                                                                                                                                                                                                                                                                                                                                                                                                                                                                                                                                                                                                                                                                                                                                                                                                                                                                                                                                                                                                                                                                                                                                                                                                    |
| <p>pLink-4</p> | <p>GGGGATCCTCTAGAGTCGACTGCAGGCATGCAAGCTTGGCGTAATCATGGTCATAGCTGTTCC<br/> TGTTGAAAATGTTATCCGCTCACAATTCACACAACATACGAGCCGGAAGCATAAAGTGTAAGC<br/> CTGGGGTCCCTAATGAGTGAGCTAATCAATTAATGCGTTGCGCTACTGCCCGTTTCCAGTC<br/> GGGAAACCTGTCGTGCCAGCTGCATTAATGAATCGGCCAACGCGCGGGGAGAGGGCGTTTGCCTA<br/> TTGGGCGCTCTCCGCTTCTCGCTCACTGACTCGCTCGCTCGGTCGTTCCGGTGCAGGCGAGCG<br/> GTATCAGCTCACTCAAAGGCGGTAATACGGTTATCCACAGAATCAGGGGATAACGCAGGAAAAGAA<br/> CATGTGAGCAAAAAGGCCAGCAAAAAGGCCAGGAACCGTAAAAAGGCCGCTTGTGGCGTTTTTCC<br/> ATAGGCTCCGCCCTTGACGAGCATCAAAAACTCGACGCTCAAGTCAACCCGCGGAAACCCG<br/> ACAGGACTATAAAGATACCAGGCGTTTCCCTGGAAGCTCCCTCGTGCCTCTCTGTTCCGACC<br/> CTGCCGTTACCGGATACTGTCCGCTTTCTCCCTTCGGGAAGCGTGGCGCTTCTCATAGCTCA<br/> CGCTGTAGGTATCTCAGTTCGGTGTAGGTCGTTCCGCTCAAGCTGGGCTGTGTGCACGAAACCC<br/> CGTTCAGCCGACCGCTGCGCTTATCCGTTATCGCTTGAAGTCAAGTCCAGTCCAAAGCATAAGAC<br/> ACTTATCGCCACTGGCAGCAGCCACTGGTAACAGGATTAGCAGAGCGAGGTATGTAGGCGGTGCT<br/> ACAGAGTCTTGAAGTGGTGGCTAACTACGGCTACACTAGAAGGACAGTATTTGGTATCTGCGCT<br/> CTGCTGAAGCCAGTTACCTTCGGAAAAAGAGTTGGTAGCTCTTGATCCGGCAAAACAAACCCG<br/> TGTAGCGGTGGTTTTTTGTTTGAAGCAGCAGATTACGCGCAGAAAAAAGGATCTCAAGAAG<br/> ATCCTTTGATCTTTTCTACGGGGTCTGACGCTCAGTGGAAACGAAAACTCACGTTAAGGGATTTGG<br/> TCATGAGATTATAAAAAGGATCTTACCTAGATCCTTTTAAATTAATAAAGTTTTAAATCAAT<br/> CTAAAGTATATAGTAAACTTGGTCTGACAGTATTTGCCGACTACCTTGGTGTATCTCGCCTTT<br/> CACGTAGTGGACAAATCTTCCAATGATCTGCGCGGAGGCCAAGCGATCTTCTTGTCCAAAG<br/> ATAAGCCTGTCTAGCTTCAAGTATGACGGGTGATACTGGGCGGCGAGGCGCTCCATGCCCCAG<br/> CGGCAGCGACATCTTCCGCGGATTTTCCGGTACTGCGCTGTACCAATGCGGGACAACGTA<br/> AGCACTACATTTGCTCATCGCCAGCCAGTCCGGCGGCGAGTTCATAGCGTTAAGTTCATTT<br/> AGCGCTCAAATAGATCCTGTTTCCGAAACCGGATCAAAGAGTTCCTCCGCGCTGGACCTACCAA<br/> GGCAACGCTATGTTCTTTGCTTTTGTGTCAGCAAGATAGCCAGATCAATGTCTGCTGGCTGGCTC<br/> GAAGATACCTGCAAGAATGTCATTGCGCTGCCATTCTCCAAATGCAGTTCGCGCTTAGCTGGATA<br/> ACGCCACGGAATGATGTCGTGTCACAACAATGGTACTTCTACAGCGCGGAGAATCTCGCTCT<br/> CTCCAGGGGAAGCCGAAGTTTCCAAAAGGTGCTGTGATCAAAGCTCGCCGCTTGTTCATCAAGC<br/> CTTACCGTACCCTAACCAGCAAACTCAATATCACTGTGTGGCTTACGGCCGCTTCCACTCGCGA<br/> GCCGTACAAATGTACGGCCAGCAACGTCGGTTCGAGATGGCGCTCGATGACGCCAACTACCTCTG<br/> ATAGTTGAGTCGATACTTCGGCGATCACCGCTTCCCTCATGATGTTAACTTTGTTTAGGGCGAC<br/> TGCCCTGCTGCGTAACATCGTTGCTGCTCCATAACATCAAACATCGACCCAGCCGTAACGCGCTT<br/> GCTTGTGGATGCCGAGGCATAGACTGTACCCCAAAAAACAGTCATAACAGCCATGAAAACC<br/> GCCACTGCGCCGTTACCACCGCTGCGTTCCGTTCAAGGTTCTGGACCAGTTGCGTGAGCGATACT<br/> CTTCTTTTTCAATATTATTGAAGCATTATCAGGGTATTGTCTCATGAGCGGATACATATTTGAA<br/> TGTATTTAGAAAAATAAACAAATAGGGGTTCCGGCGACATTTCCCCGAAAAAGTCCACCTGACGTC<br/> TAAGAACCATTATTATCATGACATTAACCTATAAAAAATAGGCGTATCACGAGGCCCTTTCGACTC<br/> CGCGTTTTCCGGTGTGACGGGTGAAAACTTGCACATGACAGCTCCCGGAGATGGTACAGCTTG<br/> TCTGTAAGCGGATGCCGGGAGCAGACAAGCCGTCAGGGCGGTCAGCGGGTGTGGCGGGTGT<br/> CGGGGCTGGCTTAACTATGCGGCATCAGAGCAGATTGACTGAGAGTGCACCATATGCGGTGTGA<br/> AATACCGCACAGATGCGTAAGGAGAAAAACCCGATCAGGCGCCATTCCGCTTACAGGCTGCGCA<br/> ACTGTTGGGAAGGGGATCGGTGCGGGCTTCTCGCTATTACGCCAGCTGGCGTAAAGGGGATGT<br/> GCTGCAAGGCGATTAAGTTGGGTAACGCCAGGGTTTTCCAGTACGACGTTGTAAAAACGACGGC<br/> CAGTGAATTCGAGCTCGGTACCCTTTGAAGACAACAGAGAGGATGCACATGTGACCGAGGGATTG<br/> TCTTCGTGGAAACTTGGGACTTCAGATTCCACCCCTTGAAGCGTGGAAAGCTTCCGACCTCAAG<br/> GAAGTTCGGATGTAGAGGAAATGGAAGTTTGTCTCAGATGGGGACTTCTGTTGTTTAC<br/> AAGAATGCCAGCTTATGCGGTAACGCAGAGGAAAGATTTAGCTGCAATCAGGAAAACGCCGAGA<br/> TGGATGTCGGTCAAGAAGTAAAGAACCTGCAGGAGACAGAAATCAATACTCAAACCTGCAGAA<br/> ACTTTCCTCAACAAGCTCCACAGGAAACACAGTAGGGAGGTGAAACACCGCCGCAAGAAAAGC<br/> TAAACGCTAGCTGAAATCCAGGAGTCAATGAGAGCTGAAGGTGATGCCGAACCAATGAAATA<br/> GCGGGGGCATGGGGGCAATACCCAGCAACGCCGAACTTCCTGGGCCAAA</p> |

|                       |                                                                                                                                                                                                                                                                                                                                                                                                                                                                                                                                                                                                                                                                                                                                                                                                                                                                                                                                                                                                                                                                                                                                                                                                                                                                                                                                                                                                                                                                                                                                                                                                                                                                                                                                                                                                                                                                                                                                                                                                                                                                                                                                                                                                                                                                                                                                                                                                                                                                                                                                                                                                                                                                                                                                                                                                                                                                                                                                                                                                                                                                                                                                                                                                                                                                                                                                                                                                                                                                                                                                                                                                                                                                                                                            |
|-----------------------|----------------------------------------------------------------------------------------------------------------------------------------------------------------------------------------------------------------------------------------------------------------------------------------------------------------------------------------------------------------------------------------------------------------------------------------------------------------------------------------------------------------------------------------------------------------------------------------------------------------------------------------------------------------------------------------------------------------------------------------------------------------------------------------------------------------------------------------------------------------------------------------------------------------------------------------------------------------------------------------------------------------------------------------------------------------------------------------------------------------------------------------------------------------------------------------------------------------------------------------------------------------------------------------------------------------------------------------------------------------------------------------------------------------------------------------------------------------------------------------------------------------------------------------------------------------------------------------------------------------------------------------------------------------------------------------------------------------------------------------------------------------------------------------------------------------------------------------------------------------------------------------------------------------------------------------------------------------------------------------------------------------------------------------------------------------------------------------------------------------------------------------------------------------------------------------------------------------------------------------------------------------------------------------------------------------------------------------------------------------------------------------------------------------------------------------------------------------------------------------------------------------------------------------------------------------------------------------------------------------------------------------------------------------------------------------------------------------------------------------------------------------------------------------------------------------------------------------------------------------------------------------------------------------------------------------------------------------------------------------------------------------------------------------------------------------------------------------------------------------------------------------------------------------------------------------------------------------------------------------------------------------------------------------------------------------------------------------------------------------------------------------------------------------------------------------------------------------------------------------------------------------------------------------------------------------------------------------------------------------------------------------------------------------------------------------------------------------------------|
| <p><b>pLink-5</b></p> | <p>GGGTACCGAGCTCGAATTCACCTGGCCGTCGTTTTACAACGTCGTGACTGGGAAAACCCCTGGCGTT<br/> ACCCAACCTAATCGCCTTGCAGCACATCCCCCTTTCGCCAGCTGGCGTAATAGCGAAGAGGCCCG<br/> CACCAGTCGCCCTTCCCAACAGTTGCGCAGCCTGAATGGCGAATGGCCGCTGATGCGGTATTTTC<br/> TCCTTACGCATCTGTGCGGTATTTACACCCGCATATGGTGCACTCTCAGTACAATGCTCTGATG<br/> CCGCATAGTTAAGCCAGCCCCGACACCCGCCAACACCCGCTGACGCGCCCTGACGGGCTTGTCTG<br/> CTCCCGGCATCCGCTTACAGACAAGCTGTGACCATCTCCGGGAGCTGCATGTGTCAAGGTTTTC<br/> ACCGTCATCACCGAAACGCGCGAGTCGAAAGGGCCTCGTGATACGCCTATTTTTATAGGTTAATGT<br/> CATGATAATAATGGTTTCTTAGACGTCAGGTGGCACTTTTCGGGGAATGTGCGCGGAACCCCTAT<br/> TTGTTTATTTTTCTAAATACATTCAAATATGTATCCGCTCATGAGACAATAACCCGTATAAATGCTT<br/> CAATAATATTGAAAAAGGAAGAGTATGCGCTCACGCAACTGGTCCAGAACCTTGACCGAACGCAG<br/> CGGTGGTAACGGCGCAGTGGCGGTTTTTCATGGCTTGTATGACTGTTTTTTTTGGGGTACAGTCTAT<br/> GCCTCGGGCATCCAAGCAGCAAGCGCGTTACGCCGTGGGTGCGATGTTTGTATGTTAGGAGCAGCA<br/> ACGATGTTACGCAGCAGGGCAGTCGCCCTAAAAAAGTTAAACATCATGAGGGAAAGCGGTGATC<br/> GCCGAAGTATCGACTCAACTATCAGAGGTAGTTGGCGTCATCGAGCGCCATCTCGAACCGACGTT<br/> GCTGGCCGTACATTTGTACGGCTCCGCAGTGGATGGCGGCCTGAAGCCACACAGTATATTGATT<br/> TGCTGGTTACGGTGACCGTAAGGCTTGTGAAACAACCGCGCGAGCTTTGATCAACGACCTTTTG<br/> GAACTTCGGCTTCCCTGGAGAGAGCGAGATTCTCCGCGCTGTAGAAGTCAACCATTTGTTGTGCA<br/> CGACGACATCATTCCGTGGCGTTATCCAGCTAAGCGCGAACTGCAATTTGGAGAATGGCAGCGCA<br/> ATGACATTTCTGCAGGTATCTTCGAGCCAGCCAGATCGACATTTGATCTGGCTATCTTGCTGACAA<br/> AAGCAAGAGAACATAGCGTTGCCCTGGTAGGTTCCAGCGGGCGGAGGAACCTTTGATCCGGTTCCT<br/> GAACAGGATCTATTTGAGCGCCTAAATGAAACCTTAAACGCTATGGAACTCGCCGCCGACTGGGC<br/> TGGCGATGAGCGAAATGTAGTGCTTACGTTGTCCCGCATTTGGTACAGCGCAGTAACCGGCAAAA<br/> TCGCGCCGAAGGATGTCGCTGCCGACTGGGCAATGGAGCGCCTGCCGGCCAGTATCAGCCCGTC<br/> ATACTGAAGCTAGACAGGCTTATCTTGGACAAGAAGAAGATCGCTTGGCCTCGCGCGCAGATCA<br/> TTTGAAAGAAATTTGTCCACTACGTGAAAGCGAGATCACCAAGGTAGTCCGCTCAACCACTTTTT<br/> ACCAAGTTTACTCATATATACTTTAGATTGATTTAAAACCTCATTTTTAATTTAAAAGGATCTAGGT<br/> GAAGATCCTTTTTGATAATCTCATGACCAAAATCCCTTAACTGAGTTCGTTCCACTGAGCGTC<br/> AGACCCCGTAGAAAAGATCAAAGGATCTTCTTGAGATCCTTTTTTTCTGCGCGTAATCTGCTGCTT<br/> GCAAAACAAAAAACCCAGCTACCAGCGGTGTTTGTGTTGCGGATCAAGCTACCAACTTTTTT<br/> TCCGAAGGTAACCTGGCTTACGAGAGCGCAGATACCAATACTGTCCTTCTAGTGTAGCCGTAAT<br/> AGGCCACCCTCAAGAACTCTGTAGCACCAGCTACATACCTCGCTCTGTAATCCTGTTACCAGT<br/> GGCTGCTGCCAGTGGCGATAAGTCGTGCTTACCAGGTTGGACTCAAGACGATAGTTACCGGATA<br/> AGGCGCAGCGGTCCGGCTGAACGGGGGTTCTGTCACACAGCCAGCTTGGAGCGCAACGACCTA<br/> CACCGAACTGAGATACCTACAGCGTGAAGTATGAGAAAGCGCCACGCTTCCCGAAGGGAGAAAG<br/> CGGACAGGTATCCGTAAGCGGCAGGGTCGGAACAGGAGAGCGCACGAGGGAGCTTCCAGGGGG<br/> AAACGCCTGGTATCTTTATAGTCTGTCGGGTTTCGCCACCTCTGACTTGAGCGTGCATTTTTGTG<br/> ATGCTCGTCAGGGGGCGGAGCCTATGGAAAAACGCCAGCAACCGCGCCTTTTTACGGTTCCTGG<br/> CCTTTGCTGGCTTTTTGCTCACATGTTCTTCTCGTTTATCCCTGATTCGCTGGATAACCCGAT<br/> TACCGCCTTTGAGTGAGCTGATACCGCTCGCCGAGCCGAACGACCGAGCGCAGCGAGTCAAGTGA<br/> GCGAGGAAGCGGAAGAGCGCCCAATACGCAACCGCCTTCCCCGCGCGTTGGCCGATTCAATA<br/> TGCAGCTGGCACGACAGGTTTCCCGACTGAAAAGCGGGCAGTGAGCGCAACGCAATTAATGTGAG<br/> TTAGTCACTCATTAGGCACCCAGGCTTTACACTTTATGCTTCCGGCTCGTATGTTGTGGAAT<br/> TGTGAGCGGATAACAATTTACACAGGAAACAGCTATGACCATGATTACGCCAAGCTTGCATGCCT<br/> GCAGGTCGACTCTAGAGGATCCCTTTGAAGACAATGTGGAGGATGCACATGTGACCGAGGGATT<br/> GTCTTCGTGAAAACCTTGGGACTTCAGATTCACCCCTTGAAGCGTGGAAAAGCCTTCCGACCAAG<br/> GGAAGTGTGCGATGTAGAGGAAATGAAAAGTTGTTCTCAGATGGGGACTTGCCTGATTGCTTCA<br/> CAAAATGCCAGCTTATGCGGTAACCGCAGAGAAAGATTAGCTGCAATCAGGAAAGGCCCGAG<br/> ATGGATGTCGGTCAAGAAGTTAAAGAACCTGCAGGAGACAGAAATCAATACTCAAACCTGCAGA<br/> AACTTTCCTCAACAAGCTCCACAGGAAACACAGTAGGGAGGTGAAACACCGCCGCAAGAAAG<br/> CTAAACCCCTAGCTGAAATCCAGGAGTCAATGAGAGCTGAAGGTGATGCCGAACCAATGAAATA<br/> AGCGGGGGCATGGGGCAATACCCAGCAACGCGAACTTCTTGGGCCAAA</p> |
| <p><b>pLink-6</b></p> | <p>GGGGATCCTCTAGAGTCGACCTGCAGGCATGCAAGCTTGGCGTAATCATGGTCATAGCTGTTTCC<br/> TGTGTGAAATGTTATCCGCTCACAATTCACACAACATACGAGCCGGAAGCATAAAGTGTAAAGC<br/> CTGGGGTGCCATAATGAGTGAGCTAACTCACATTAATGGCGTTGCGCTCACTGCCCGCTTCCAGTC<br/> GGAAACCTGTGCTGCCAGCTGCATTAATGAATCGCCCAACCGCGGGAGAGCGGGTTTTGCGTA<br/> TTGGGGCGTCTTCCGCTTCTCGCTCACTGACTCGCTGCGCTCGGTCGTTCCGGTGGCGGAGCG<br/> GTATCAGCTACTCAAAGGCGGTAATACGGTTATCCACAGAATCAGGGGATAACGAGGAAAGAA<br/> CATGTGAGCAAAAAGGCCAGCAAAAAGGCCAGGAACCGTAAAAAGGCCGCTTGGTGGCGTTTTTCC<br/> ATAGGCTCCGCCCTTGACGAGCATCACAATACTGACGCTCAAGTCAAGTGGGAGTGGCGAAACCCG<br/> ACAGGACTATAAAGATACCAGGCGTTTCCCCCTGGAAGCTCCCTCGTGCGCTCTCTGTTCCGACC<br/> CTGCCGCTTACCGGATACCTGTCCGCTTCTCCCTTCGGGAAGCGTGGCGCTTCTCATAGCTCA<br/> CGCTGTAGGTATCTCAGTTCGGTGTAGGTCGTTCCGCTCCAAGCTGGGCTGTGTGCACGAACCC<br/> CGTTCAGCCCGACCGCTGCGCCTTATCCGGTAATCTGCTTTCGAGTCAACCCGCTGAAGACAGC<br/> ACTTATCGCCACTGGCAGCAGCCACTGGTAACAGGATAGCAGAGCGAGGATGTAGGCGGTGCT<br/> ACAGAGTCTTGAAGTGGTGGCTAACTACGGCTACACTAGAAGGACAGTATTTGGTATCTGCGCT<br/> CTGCTGAAGCCAGTTACCTTCGGAAGAAAGAGTTGGTAGCTCTTGATCCGGCAAAACAAACCCG<br/> TGTGAGCGGTGGTTTTTTTTGTTTGAAGCAGCAGATTACGCGCAGAAAAAAGGATCTCAAGAAG<br/> ATCCTTTGATCTTTTCTACGGGGTCTGACGCTACGCTGGAACGAAAACTCACTGTAAGGGATTTGG<br/> TCATGAGATTATAAAAAGGATCTTACCTAGATCCTTTTTAAATTAATAATGAAGTTTTAAATCAAT<br/> CTAAAGTATATATGAGTAAACTTGGTCTGACAGTTATTTGCCGACTACCTTGGTATCTCGCCTT<br/> CACGTAGTGGACAAATCTTCCAATGATCTGCGCGGAGGCCAAGCGATCTTCTTCTTGTCCAAG<br/> ATAAGCTGTCTAGCTTCAAGTATGACGGGTGATACTGGGCGGGCAGGCTCCATGCCCAGT<br/> CGGCAGCGACATCTTCCGCGCGATTTTGGCGGTTACTGCGCTGTACCAATGCGGGACAACGTA<br/> AGCACTACATTTGCTCATCGCCAGCCAGTCGGGCGGCGAGTTCCATAGCGTTAAGTTTCATTT<br/> AGCGCCTCAAATAGATCCTGTTTCAAGAACCGGATCAAAGAGTTCTCCGCGCTGCGGCTTACCA<br/> GGCAACGCTATGTTCTTGTCTTTGTCAGCAAGATAGCCAGATCAATGCTGAGCTGGCTGGCTC<br/> GAAGATACCTGCAAGAATGTCATTGCGCTGCCATTTCCAAATTCAGTTCGCGCTTAGCTGGATA<br/> ACGCCACGGAATGATGTCGTCGTGACAACAATGGTGACTTCTACAGCGCGGAGAATCTGCTCT</p>                                                                                                                                                                                                                                                                                                                                                                                                                                                                                                                                                                                                                                                                                                                                                                                                                                                                                                                                                                                                                                                                                                                                                                                                                                                                                                                                                                                                                                                                                                                                                                                                                                                                                                                                                          |

|                       |                                                                                                                                                                                                                                                                                                                                                                                                                                                                                                                                                                                                                                                                                                                                                                                                                                                                                                                                                                                                                                                                                                                                                                                                                                                                                                                                                                                                                                                                                                                                                                                                                                                                                                                                                                                                                                                                                                                                                                                                                                                                                                                                                                                                                                                                                                                                                                                                                                                                                                                                                                                                                                                                                                                                                                                                                                                                                                                                                                                                                                                                                                                                                                                                                                                                                                                                                                                                                                                                                                                                                                                                                                                                                            |
|-----------------------|--------------------------------------------------------------------------------------------------------------------------------------------------------------------------------------------------------------------------------------------------------------------------------------------------------------------------------------------------------------------------------------------------------------------------------------------------------------------------------------------------------------------------------------------------------------------------------------------------------------------------------------------------------------------------------------------------------------------------------------------------------------------------------------------------------------------------------------------------------------------------------------------------------------------------------------------------------------------------------------------------------------------------------------------------------------------------------------------------------------------------------------------------------------------------------------------------------------------------------------------------------------------------------------------------------------------------------------------------------------------------------------------------------------------------------------------------------------------------------------------------------------------------------------------------------------------------------------------------------------------------------------------------------------------------------------------------------------------------------------------------------------------------------------------------------------------------------------------------------------------------------------------------------------------------------------------------------------------------------------------------------------------------------------------------------------------------------------------------------------------------------------------------------------------------------------------------------------------------------------------------------------------------------------------------------------------------------------------------------------------------------------------------------------------------------------------------------------------------------------------------------------------------------------------------------------------------------------------------------------------------------------------------------------------------------------------------------------------------------------------------------------------------------------------------------------------------------------------------------------------------------------------------------------------------------------------------------------------------------------------------------------------------------------------------------------------------------------------------------------------------------------------------------------------------------------------------------------------------------------------------------------------------------------------------------------------------------------------------------------------------------------------------------------------------------------------------------------------------------------------------------------------------------------------------------------------------------------------------------------------------------------------------------------------------------------------|
|                       | <p>CTCCAGGGGAAGCCGAAGTTTCCAAAAGGTCGTTGATCAAAGCTCGCCGCGTGTGTTTCATCAAGC<br/> CCTACGGTCACCGTAACCAGCAAATCAATATCACTGTGTGGCTTCAGGCCGCCACTGCGGGA<br/> GCCGTACAAATGTACGGCCAGCAACGTGCGTTCGAGATGGCGCTCGATGACGCCAACTACCTCTG<br/> ATAGTTGAGTCGATACTTCGGCGATCACCGCTTCCCTCATGATGTTTAACTTTGTTAGGGCGAC<br/> TGCCCTGCTGCGTAACATCGTTGCTGCTCCATAACATCAAACATCGACCCACGGCGTAACGCGCTT<br/> GCTGCTTGGATGCCCGAGGCATAGACTGTACCCCAAAAAAACAGTCATAACAAGCCATGAAAACC<br/> GCCACTGCGCCGTTACCACCGCTGCGTTCGGTCAAGGTTCTGGACCAGTTGCGTGAGCGCATACT<br/> CTTCCTTTTCAATATTATGAAGCATTATCAGGGTTATTGTCTCATGAGCGGATACATATTTGAA<br/> TGTATTTAGAAAAATAAACAAATAGGGGTTCCGCGCACATTTCCCCGAAAAGTGCCACCTGACGTC<br/> TAAGAAACCATTATTATCATGACATTAACCTATAAAAAATAGGCGTATCACGAGGCCCTTTCGACTC<br/> GCGCGTTTCGGTGATGACGGTGAAAACTCTGACACATGCAGCTCCCGGAGATGGTCACAGCTTG<br/> CGGGGCTGGCTTAACTATGCGGCATCAGAGCAGATTGTAAGTACTGAGAGTGCACCATATGCGGTGTA<br/> AATACCGCACAGATGCGTAAGGAGAAAATACCGCATCAGGCGCCATTTCGCCATTAGGCTGCGCA<br/> ACTGTTGGGAAGGGCGATCGGTGCGGGCTCTTCGCTATTACGCCAGCTGGCGAAAGGGGGATGT<br/> GCTGCAAGGCGATTAAAGTTGGGTAACGCCAGGGTTTCCAGTCACGACGTTGTAACACGACGGC<br/> CAGTGAATTCGAGCTCGGTACCCCTTTGAAGACAAGAGCGAGGATGCACATGTGCCAGGGATTG<br/> TCTTCGTGGAACTTGGGACTTCAGATTCCACCCCTTGCAAGCGTGGAAGCCTTCCGACCAAGG<br/> GAAGTGTCCGATGTAGAGGAAATGGAAGTTTGTCTCAGATGGGGACTTGCTGATTGCTTAC<br/> AGAATGCCAGCTTATGCGGTAACGCAGAGGAAGATTAGTGAATCAGGAAAACGCCCGGAGA<br/> TGGATGTCGGTCAAGAAAGTAAAGAACTGAGAGACAGAAAATCAATACTAAACCCTGCAGAA<br/> ACTTTCCTCAACAAGCTCCACAGGAAACACAGTAGGGAGGTGAAACACCAGGCCGAAAGAAAGC<br/> TAAACGCCTAGCTGAAATCCAGGAGTCAATGAGAGCTGAAGGTGATGCCGAACCAAATGAAATAA<br/> GCGGGGCGATGGGGCAATACCCAGCAACGCCGAACCTTCTGGGCCAAA</p>                                                                                                                                                                                                                                                                                                                                                                                                                                                                                                                                                                                                                                                                                                                                                                                                                                                                                                                                                                                                                                                                                                                                                                                                                                                                                                                                                                                                                                                                                                                                                                                                                                                                                                                                                                                                                                                                                                                                                                                                                         |
| <p><b>pLink-7</b></p> | <p>GGGTACCGAGCTCGAATTAACCTGCGCTGTTTACAACGTCGTGACTGCGAAAACCTGGCGTT<br/> ACCCAACCTAATCGCCTTGCAGCACATCCCCCTTTCGCCAGCTGGCGTAATAGCGAAGAGGCCCG<br/> CACCGATCGCCCTTCCCAACAGTTGCGCAGCCTGAATGGCGAATGGCGCCTGATGCGGTATTTTC<br/> TCCTACGCATCTGTGCGGTATTTACACCCGCATATGGTGCACTCTCAGTACAATCTGCTCTGATG<br/> CCGATAGTTAAGCCAGCCCCGACCCCGCAACCCGCTGACGCGCCTGACGGGCTGTCTG<br/> CTCCCGCATCCGCTTACAGACAAGCTGTGACCATCTCCGGGAGCTGCATGTGTCAGAGTTTTC<br/> ACCGTCATCACGAAACGCGGAGTCGAAAGGGCTCGTGATACGCCTATTTTTATAGGTTAATGT<br/> CATGATAATAATGGTTTCTTAGACGTCAGGTGGCCTTTTCGGGGAAATGTGCGCGGAACCCCTAT<br/> TTGTTATTTTTCTAAATACATTTAAATATGTATCCGCTCATGAGACAATAACCTGATAAATGCTT<br/> CAATAATATTGAAAAGGAAGATATGCGCTACCGCAACTGGTCCAGAACCTGACAGACCGCA<br/> CGGTGGTAACGGCGCAGTGGCGGTTTTCATGGCTTGTATGACTGTTTTTTTTGGGGTACAGTCTAT<br/> GCCTCGGGCATCCAAGCAGCAAGCGGTTACGCCGTGGGTCGATGTTTGATGTTATGGAGCAGCA<br/> ACGATGTTACGCAGCAGGGCAGTCGCCCTAAAACAAAGTTAAACATCATGAGGGAAGCGGTGATC<br/> CCGAAAGTATCGACTCAACTATCAGAGGATGTTGGCTCATCGAGCGCCTGACGCGCCTGACGCTT<br/> GCTGGCCGTACATTTGTACGGCTCCGCACTGGATGGCGGCTGAAGCCACACAGTGATATTGATT<br/> TGCTGGTTACGGTGACCGTAAGGCTTGATGAAACAACGCGGCGAGCTTTGATCAACGACCTTTG<br/> GAAACTTCGGCTTCCCTGGAGAGAGCGAGATTCTCCGCGCTGTAGAAGTCAACATTGTTGTGCA<br/> CGACGACATCATTCCGTGGGCTTATCCAGCTAAGCGCAACTGCAATTTGGAAATGGCAGCGCA<br/> ATGACATTCTTGACGGTATCTTCAGCCAGCCACGATCGACATTGATCTGGCTATCTTGCTGACAA<br/> AAGCAAGAGAACATAGCGTTGCCCTGGTAGGTCCAGCGGCGGAGGAACTCTTTGATCCGGTTCTT<br/> GAACAGGATCTATTTGAGGCGCTAAATGAAACCTTAAACGCTATGGAAGTCCGCCGCCGACTGGG<br/> TGGCGATGAGCGAAATGTAGTGCTTACGTTGTCCCGCATTGGTACAGCGCAGTAACCGGCAAAA<br/> TCGCGCCGAAGGATGTCGCTGCGGACTGGGCACTGGAGCGCCTGCCGCGCCAGTACCGCCGTC<br/> ATACTTGAAGCTAGACAGGCTTATCTTGGACAAGAAGAAGATCGCTTGGCCTCGCGCGCAGATCA<br/> GTTGGAAGAATTTGTCCACTACGTGAAAGGCGAGATCACCAAGGTAGTCGGCAATAACTGTGCA<br/> ACCAAGTTACTCATATATACTTTAGATTGATTTAAAACCTTCAATTTTTAAATGAAAGGATCAGGT<br/> GAAGATCCTTTTTGATAATCTCATGACCAAAATCCCTTAAACGTGAGTTTTGCTTCAACTGAGCGTC<br/> AGACCCCGTAGAAAAGATCAAAGGATCTTCTTGAGATCCTTTTTTTCTGCGCGTAATCTGCTGCTT<br/> GCAAAACAAAAAACACCGCTACCAGCGGTGGTTTTGTTTGGCGGATCAAGAGCTACCAACTTTTT<br/> TCCGAAGGTAACCTGGCTTACAGAGCGCAGATACCAATACTGTCTCTAGTGAGCGGTAGTT<br/> AGGCCACCCTTCAAGAACTCTGTAGCACCCCTACATACCTCGCTCTGTCTGTACCAGT<br/> GGCTGCTGCCAGTGGCGATAAGTCTGTCTTACCGGGTTGGACTCAAGACGATAGTTACCGGATA<br/> AGGCGCAGCGGTGCGGCTGAACGGGGGTTCTGTGCACACAGCCAGCTTGGAGCGAACGACCTA<br/> CACCGAACTGAGATACTACAGCGTGAGCTATGAGAAAGCGCCAGCTTCCCGAAGGGAGAAAGG<br/> CGGAGGATATCCGGTAAAGCGGCAGGGTCCGAAAGAGAGCGCACGAGGAGCTTCCAGGGGG<br/> AAACGCCTGGTATCTTTATAGTCTGTGCGGGTTTCGCCACCTCTGACTTGAGCGTGCATTTTGTG<br/> ATGCTCGTCAGGGGGGCGGAGCCTATGAAAAACGCCAGCAACGCGGCTTTTTACGGTTCCTGG<br/> CCTTTGTCTGGCCTTTTGTCTACATGTTCTTTCCTGCTTATCCCTGATCTGTGATAACCGTAT<br/> TACCCCCTTGTAGTGAGCTGATACCGCTCGCCGACGCGAACGACCGGAGCGCAGCGAGTACGAT<br/> GCGAGGAAGCGGAAGAGCGCCCAATACGCAAAACCGCCTTCCCGCGCGTGGCCGATTCAATTA<br/> TGCAGCTGGCAGCAGGTTTCCCGACTGGAAGCGGGCAGTGAGCGCAACGCAATTAATGTGAG<br/> TTAGTCACTCATTAGGCACCCAGGCTTTACACTTTATGCTTCCGGCTCGTATGTTGTGTGGAAT<br/> TGTGAGCGGATAACAATTTACACAGGAAACAGCTATGACCATGATTACGCCAAGCTTGCATGCCT<br/> GCAGGCTCACTAGAGGATCCCTTGAAGACAATGCCGAATTCGATATCCGACATGACCCGAG<br/> GGATTGTCTTCGTGGAACTTGGGACTTCAGATTCCACCCCTTGCAAGCGTGGAAGCCTTCCGAC<br/> CAAGGGAAGTGTCCGATGTAGAGGAAATGGAAGTTTGTCTCAGATGGGGACTTGCTGATTGCT<br/> TTCACAAGAATGCCAGCTTATGCGGTAACGCAGAGGAAGATTTAGTGAATCAGGAAAAACGCC<br/> CGAGATGGATGTCGGTCAAGAAAGTAAAGAACTGCAGGAGACAGAAAATCAATACTAAACCCTG<br/> CAGAAACTTTCCTCAACAAGCTCCACAGGAAACACAGTAGGGAGGTGAAACACCAGGCCGAAAG<br/> AAAGCTAAACGCCTAGCTGAAATCCAGGAGTCAATGAGAGCTGAAGGTGATGCCGAACCAAATGA<br/> AATAAGCGGGGGCATGGGGGCAATACCCAGCAACGCCGAACCTTCTGGGCCAAA</p> |
| <p><b>pLink-8</b></p> | <p>GGGTACCGAGCTCGAATTAACCTGCGCTGTTTACAACGTCGTGACTGCGAAAACCTGGCGTT<br/> ACCCAACCTAATCGCCTTGCAGCACATCCCCCTTTCGCCAGCTGGCGTAATAGCGAAGAGGCCCG<br/> CACCGATCGCCCTTCCCAACAGTTGCGCAGCCTGAATGGCGAATGGCGCCTGATGCGGTATTTTC<br/> TCCTACGCATCTGTGCGGTATTTACACCCGCATATGGTGCACTCTCAGTACAATCTGCTCTGATG<br/> CCGATAGTTAAGCCAGCCCCGACCCCGCAACCCGCTGACGCGCCTGACGGGCTGTCTG<br/> CTCCCGCATCCGCTTACAGACAAGCTGTGACCATCTCCGGGAGCTGCATGTGTCAGAGTTTTC<br/> ACCGTCATCACGAAACGCGGAGTCGAAAGGGCTCGTGATACGCCTATTTTTATAGGTTAATGT<br/> CATGATAATAATGGTTTCTTAGACGTCAGGTGGCCTTTTCGGGGAAATGTGCGCGGAACCCCTAT<br/> TTGTTATTTTTCTAAATACATTTAAATATGTATCCGCTCATGAGACAATAACCTGATAAATGCTT<br/> CAATAATATTGAAAAGGAAGATATGCGCTACCGCAACTGGTCCAGAACCTGACAGACCGCA<br/> CGGTGGTAACGGCGCAGTGGCGGTTTTCATGGCTTGTATGACTGTTTTTTTTGGGGTACAGTCTAT<br/> GCCTCGGGCATCCAAGCAGCAAGCGGTTACGCCGTGGGTCGATGTTTGATGTTATGGAGCAGCA<br/> ACGATGTTACGCAGCAGGGCAGTCGCCCTAAAACAAAGTTAAACATCATGAGGGAAGCGGTGATC<br/> CCGAAAGTATCGACTCAACTATCAGAGGATGTTGGCTCATCGAGCGCCTGACGCGCCTGACGCTT<br/> GCTGGCCGTACATTTGTACGGCTCCGCACTGGATGGCGGCTGAAGCCACACAGTGATATTGATT<br/> TGCTGGTTACGGTGACCGTAAGGCTTGATGAAACAACGCGGCGAGCTTTGATCAACGACCTTTG<br/> GAAACTTCGGCTTCCCTGGAGAGAGCGAGATTCTCCGCGCTGTAGAAGTCAACATTGTTGTGCA<br/> CGACGACATCATTCCGTGGGCTTATCCAGCTAAGCGCAACTGCAATTTGGAAATGGCAGCGCA<br/> ATGACATTCTTGACGGTATCTTCAGCCAGCCACGATCGACATTGATCTGGCTATCTTGCTGACAA<br/> AAGCAAGAGAACATAGCGTTGCCCTGGTAGGTCCAGCGGCGGAGGAACTCTTTGATCCGGTTCTT<br/> GAACAGGATCTATTTGAGGCGCTAAATGAAACCTTAAACGCTATGGAAGTCCGCCGCCGACTGGG<br/> TGGCGATGAGCGAAATGTAGTGCTTACGTTGTCCCGCATTGGTACAGCGCAGTAACCGGCAAAA<br/> TCGCGCCGAAGGATGTCGCTGCGGACTGGGCACTGGAGCGCCTGCCGCGCCAGTACCGCCGTC<br/> ATACTTGAAGCTAGACAGGCTTATCTTGGACAAGAAGAAGATCGCTTGGCCTCGCGCGCAGATCA<br/> GTTGGAAGAATTTGTCCACTACGTGAAAGGCGAGATCACCAAGGTAGTCGGCAATAACTGTGCA<br/> ACCAAGTTACTCATATATACTTTAGATTGATTTAAAACCTTCAATTTTTAAATGAAAGGATCAGGT<br/> GAAGATCCTTTTTGATAATCTCATGACCAAAATCCCTTAAACGTGAGTTTTGCTTCAACTGAGCGTC<br/> AGACCCCGTAGAAAAGATCAAAGGATCTTCTTGAGATCCTTTTTTTCTGCGCGTAATCTGCTGCTT<br/> GCAAAACAAAAAACACCGCTACCAGCGGTGGTTTTGTTTGGCGGATCAAGAGCTACCAACTTTTT<br/> TCCGAAGGTAACCTGGCTTACAGAGCGCAGATACCAATACTGTCTCTAGTGAGCGGTAGTT<br/> AGGCCACCCTTCAAGAACTCTGTAGCACCCCTACATACCTCGCTCTGTCTGTACCAGT<br/> GGCTGCTGCCAGTGGCGATAAGTCTGTCTTACCGGGTTGGACTCAAGACGATAGTTACCGGATA<br/> AGGCGCAGCGGTGCGGCTGAACGGGGGTTCTGTGCACACAGCCAGCTTGGAGCGAACGACCTA<br/> CACCGAACTGAGATACTACAGCGTGAGCTATGAGAAAGCGCCAGCTTCCCGAAGGGAGAAAGG<br/> CGGAGGATATCCGGTAAAGCGGCAGGGTCCGAAAGAGAGCGCACGAGGAGCTTCCAGGGGG<br/> AAACGCCTGGTATCTTTATAGTCTGTGCGGGTTTCGCCACCTCTGACTTGAGCGTGCATTTTGTG<br/> ATGCTCGTCAGGGGGGCGGAGCCTATGAAAAACGCCAGCAACGCGGCTTTTTACGGTTCCTGG<br/> CCTTTGTCTGGCCTTTTGTCTACATGTTCTTTCCTGCTTATCCCTGATCTGTGATAACCGTAT<br/> TACCCCCTTGTAGTGAGCTGATACCGCTCGCCGACGCGAACGACCGGAGCGCAGCGAGTACGAT<br/> GCGAGGAAGCGGAAGAGCGCCCAATACGCAAAACCGCCTTCCCGCGCGTGGCCGATTCAATTA<br/> TGCAGCTGGCAGCAGGTTTCCCGACTGGAAGCGGGCAGTGAGCGCAACGCAATTAATGTGAG<br/> TTAGTCACTCATTAGGCACCCAGGCTTTACACTTTATGCTTCCGGCTCGTATGTTGTGTGGAAT<br/> TGTGAGCGGATAACAATTTACACAGGAAACAGCTATGACCATGATTACGCCAAGCTTGCATGCCT<br/> GCAGGCTCACTAGAGGATCCCTTGAAGACAATGCCGAATTCGATATCCGACATGACCCGAG<br/> GGATTGTCTTCGTGGAACTTGGGACTTCAGATTCCACCCCTTGCAAGCGTGGAAGCCTTCCGAC<br/> CAAGGGAAGTGTCCGATGTAGAGGAAATGGAAGTTTGTCTCAGATGGGGACTTGCTGATTGCT<br/> TTCACAAGAATGCCAGCTTATGCGGTAACGCAGAGGAAGATTTAGTGAATCAGGAAAAACGCC<br/> CGAGATGGATGTCGGTCAAGAAAGTAAAGAACTGCAGGAGACAGAAAATCAATACTAAACCCTG<br/> CAGAAACTTTCCTCAACAAGCTCCACAGGAAACACAGTAGGGAGGTGAAACACCAGGCCGAAAG<br/> AAAGCTAAACGCCTAGCTGAAATCCAGGAGTCAATGAGAGCTGAAGGTGATGCCGAACCAAATGA<br/> AATAAGCGGGGGCATGGGGGCAATACCCAGCAACGCCGAACCTTCTGGGCCAAA</p> |

|         |                                                                                                                                                                                                                                                                                                                                                                                                                                                                                                                                                                                                                                                                                                                                                                                                                                                                                                                                                                                                                                                                                                                                                                                                                                                                                                                                                                                                                                                                                                                                                                                                                                                                                                                                                                                                                                                                                                                                                                                                                                                                                                                                                                                                                                                                                                                                                                                                                                                                                                                                                                                                                                                                                                                                                                                                                                                                                                                                                                                                                                                                                                                                                                                                                                                                                                                                                                                                                                                                                                                |
|---------|----------------------------------------------------------------------------------------------------------------------------------------------------------------------------------------------------------------------------------------------------------------------------------------------------------------------------------------------------------------------------------------------------------------------------------------------------------------------------------------------------------------------------------------------------------------------------------------------------------------------------------------------------------------------------------------------------------------------------------------------------------------------------------------------------------------------------------------------------------------------------------------------------------------------------------------------------------------------------------------------------------------------------------------------------------------------------------------------------------------------------------------------------------------------------------------------------------------------------------------------------------------------------------------------------------------------------------------------------------------------------------------------------------------------------------------------------------------------------------------------------------------------------------------------------------------------------------------------------------------------------------------------------------------------------------------------------------------------------------------------------------------------------------------------------------------------------------------------------------------------------------------------------------------------------------------------------------------------------------------------------------------------------------------------------------------------------------------------------------------------------------------------------------------------------------------------------------------------------------------------------------------------------------------------------------------------------------------------------------------------------------------------------------------------------------------------------------------------------------------------------------------------------------------------------------------------------------------------------------------------------------------------------------------------------------------------------------------------------------------------------------------------------------------------------------------------------------------------------------------------------------------------------------------------------------------------------------------------------------------------------------------------------------------------------------------------------------------------------------------------------------------------------------------------------------------------------------------------------------------------------------------------------------------------------------------------------------------------------------------------------------------------------------------------------------------------------------------------------------------------------------------|
|         | <p>TCCTTACGCATCTGTGCGGTATTTTACACCCGCATATGGTGCACCTCTCAGTACAATCTGCTCTGATG<br/> CCGCATAGTTAAGCCAGCCCCGACACCCGCCAACACCCGCTGACGCGCCCTGACGGGCTTGTCTG<br/> CTCCCGCATCCGCTTACAGACAAGCTGTGACCATCTCCGGGAGCTGCATGTGTGACAGGTTTTTC<br/> ACCGTTCATACCGAAACCGCGGAGTTCGAAAGGGCTCGTGATAACGCCTATTTTTATAGGTTAATGT<br/> CATGATAATAATGGTTTTCTTAGACGTCAGGTGGCACTTTTCGGGGAAATGTGCGCGGAACCCCTAT<br/> TTGTTATTTTTCTAAATACATTCAAATATGTATCCGCTCATGAGACAATAACCCCTGATAAATGCTT<br/> CAATAATATTGAAAAAGGAAGAGTATGCGCTCACGCAACTGGTCCAGAACCTTGACCGAACGCAG<br/> CGGTGGTAACGGCGCAGTGGCGGTTTTTCATGGCTTGTATGACTGTTTTTTGGGGTACAGTCTAT<br/> GCCTCGGGCATCCAAGCAGCAAGCGGTTACGCCGTGGGTGCGATGTTTGTATGTTATGGAGCAGCA<br/> ACGATGTTACGCAGCAGGGCAGTCGCCCTAAAACAAAGTTAAACATCATGAGGGAAGCGGTGATC<br/> GCCGAAGTATCGACTCAACTATCAGAGGTAGTTGGCGTTCATCGAGCGCCATCTCGAACCGACGTT<br/> GCTGGCCGTACATTGTACGGCTCCGAGTGGATGGCGGCTGAAGCCACACAGTGATATTGATT<br/> TGCTGGTTACGGTGACCGTAAAGCTTGTATGAAACAACCGGGCAGCTTTGATCAACGACCTTTTG<br/> GAAACTTCGGCTTCCCTGGAGAGAGCGAGATTCTCCGCGCTGTAGAAGTCACCATTTGTTGTGCA<br/> CGACGACATCATCCGTTGGCGTTATCCAGCTAAGCGCGAACTGCAATTTGGAGAATGGCAGCGCA<br/> ATGACATTTTCAGGATCTTTCGAGCCAGCCAGCATCGACATTTGATCTGGCTATCTGTGACAA<br/> AAGCAAGAGAACATAGCGTTGCCTTGGTAGGTTCCAGCGGAGGAACCTTTGATCCGGTCCCT<br/> GAACAGGATCTATTTGAGGCGCTAAATGAAACCTTAAACGCTATGGAACCTCGCCGCCGACTGGGC<br/> TGGCGATGAGCGAAATGTAGTGTACGTTGTCCCGCATTGGTACAGCGCAGTAACCGGCAAAA<br/> TCGGCCGAAGGATGTCGCTGCCGACTGGGCAATGGAGCGCCTGCCGGCCAGTATCAGCCCGTC<br/> ATACTGAAGCTAGACAGGCTTATCTTGGACAAGAAGAAGATCGCTTGGCCTCGCGCGCACGCTC<br/> GTTGGAAGAATTTGTCCACTACGTGAAAGGCGAGATCACCAAGGTAGTCGGCAAATAACTGTCAG<br/> ACCAAGTTTACTCATATATACTTTAGATTGATTTAAACTTCATTTTTAATTTAAAGGATCTAGGT<br/> GAAGATCCTTTTTGATAATCTCATGACCAAAATCCCTTAAACGTGAGTTTTTCGTTCCACTGAGCGTC<br/> AGACCCCGTAGAAAAGATCAAAGGATCTTCTTGAGATCCTTTTTTCTGCGCTAATCTGCTGCTT<br/> GCAAAACAAAAAACCCCGCTACCAGCGGTGGTTTTGTTTGGCGGATCAAGAGCTACCAACTCTTTT<br/> TCCGAAGGTAACCTGGCTTACGAGAGCGCAGATACCAATACTGTCCTTCTAGTGTAGCCGTAGTT<br/> AGGCCACCACTTCAAGAACTCTGTAGCACCGCTACATACCTCGCTCTGCTAATCTGTTACCAGT<br/> GGCTTCCAGTGGCGATAAGTCTGTCTTACCGGGTTGGACTCAAGACGATAACCCGATA<br/> AGGCGCAGCGGTCCGGCTGAACGGGGGTTCTGTGCACACAGCCAGCTTGGAGCGAACCGACTA<br/> CACCGAACTGAGATACCTACAGCGTGAGCTATGAGAAAGCGCCACGCTTCCCGAAGGGAGAAAGG<br/> CGGACAGGTATCCGGTAAGCGGCAGGGTCGGAACAGGAGAGCGCACGAGGGGATCCAGGGGG<br/> AAACGCCGTGGTATCTTATAGTCTGTCCGGTTTCGCCACCTCTGACTTGAGCGTCTGTTTTGTG<br/> ATGCTCGTCAGGGGGGGCGGAGCCTATGGA AAAACGCCAGCAACCGCCCTTTTTTACGGTTCCTGG<br/> CCTTTTGCTGGCCTTTTGCTCACATGTTCTTTCTGCGTTATCCCTGATTCTGTGGATAACCGTAT<br/> TACCGCCTTTGAGTGAGCTGATACCGCTCGCCGACGCCAACGACCGAGCGCAGCGAGTCAAGTA<br/> GCGAGGAAGCGGAAGAGCGCCCAATACGCAACCGCCTCTCCCGCGCTTGGCCGATTCAATTA<br/> TGCATTTGGCACGACAGGTTTCCCGACTGGAAAGCGGGCAGTGAGCGCAACTGCAATTTGTAG<br/> TTAGTCACTCATTAGGCACCCAGGCTTTACACTTTATGCTTCCGGCTCGTATGTTGTGTGGAAT<br/> TGTGAGCGGATAACAATTTACACAGGAAACAGCTATGACCATGATTACGCCAAGCTTGCATGCCT<br/> GCAGGTCGACTCTAGAGGATCCCCTTGAAGACAACCTTCAATTCGATATCGCAATGTGACCGGAG<br/> GGATTGCTTCTGTGAAACTTGGGACTTCAGATTCCACCCCTTGCAAGCTGGAAGCCTTCCGAC<br/> CAAGGGAAGTGTCCGATGTAGAGGAAATGGAAGTTTTGTTCTCAGATGGGGACTTGTCTGATTGC<br/> TTCACAAGAAATGCCAGCTTATGCGGTAAACGCAGAGGAAGATTTAGCTGCAATCAGGAAAACGCC<br/> CGAGATGGATGTCGGTCAAGAAGTTAAAGAACCTCGAGGAGACAGAAATCAATACTCAAACCCCTG<br/> CAGAAATTTCTCAACAAGCTCCACAGGAAACACAGTAGGGAGGTGAACACCGCCGCAAAAG<br/> AAAGCTAAACGCCTAGCTGAAATCCAGGATCAATGAGAGCTGAAGGTGATGCCGAACCAATGA<br/> AATAAGCGGGGGCATGGGGGCAATACCCAGCAACGCCGAACCTTCTGGGCCAAA</p> |
| pLink-9 | <p>GGGTACCGAGCTCGAATTCAGTGGCCGCTGTTTTACAACGTCGTGACTGGGAAAACCTGGCGTT<br/> ACCCAACCTAATCGCCTTGACGACATCCCCCTTTCGCCAGCTGGCGTAATAGCGAAGAGGCCCG<br/> CACCGATCGCCCTTCCCAACAGTTGCGCAGCTGAATGGCGAATGGCGCTGATGCTATTTTC<br/> TCCTTACGCATCTGTGCGGTATTTTACACCCGCATATGGTGCACCTCTCAGTACAATCTGCTCTGATG<br/> CCGCATAGTTAAGCCAGCCCCGACACCCGCCAACACCCGCTGACGCGCCCTGACGGGCTTGTCTG<br/> CTCCCGCATCCGCTTACAGACAAGCTGTGACCATCTCCGGGAGCTGCATGTGTGACAGGTTTTTC<br/> ACCGTTCATACCGAAACCGCGGAGTTCGAAAGGGCTCGTGATAACGCCTATTTTTATAGGTTAATGT<br/> CATGATAATAATGGTTTTCTTAGACGTCAGGTGGCACTTTTCGGGGAAATGTGCGCGGAACCCCTAT<br/> TTGTTATTTTTCTAAATACATTCAAATATGTATCCGCTCATGAGACAATAACCCCTGATAAATGCTT<br/> CAATAATATTGAAAAAGGAAGAGTATGCGCTCACGCAACTGGTCCAGAACCTTGACCGAACGCAG<br/> CGGTGGTAACGGCGCAGTGGCGGTTTTTCATGGCTTGTATGACTGTTTTTTGGGGTACAGTCTAT<br/> GCCTCGGGCATCCAAGCAGCAAGCGGTTACGCCGTGGGTGCGATGTTTGTATGTTATGGAGCAGCA<br/> ACGATGTTACGCAGCAGGGCAGTCGCCCTAAAACAAAGTTAAACATCATGAGGGAAGCGGTGATC<br/> GCCGAAGTATCGACTCAACTATCAGAGGTAGTTGGCGTTCATCGAGCGCCATCTCGAACCGACGTT<br/> GCTGGCCGTACATTGTACGGCTCCGAGTGGATGGCGGCTGAAGCCACACAGTGAATGATTGATT<br/> TGCTGGTTACGGTGACCGTAAAGCTTGTATGAAACAACCGGGCAGCTTTGATCAACGACCTTTTG<br/> GAAACTTCGGCTTCCCTGGAGAGAGCGAGATTCTCCGCGCTGTAGAAGTCACCATTTGTTGTGCA<br/> CGACGACATCATCCGTTGGCGTTATCCAGCTAAGCGCGAACTGCAATTTGGAGAATGGCAGCGCA<br/> ATGACATTTTCAGGATCTTTCGAGCCAGCCAGCATCGACATTTGATCTGGCTATCTGTGACAA<br/> AAGCAAGAGAACATAGCGTTGCCTTGGTAGGTTCCAGCGGAGGAACCTTTGATCCCGGTTCCCT<br/> GAACAGGATCTATTTGAGGCGCTAAATGAAACCTTAAACGCTATGGAACCTCGCCGCCGACTGGGC<br/> TGGCGATGAGCGAAATGTAGTGTACGTTGTCCCGCATTGGTACAGCGCAGTAACCGGCAAAA<br/> TCGGCCGAAGGATGTCGCTGCCGACTGGGCAATGGAGCGCCTGCCGGCCAGTATCAGCCCGTC<br/> ATACTGAAGCTAGACAGGCTTATCTTGGACAAGAAGAAGATCGCTTGGCCTCGCGCGCACGCTCA<br/> GTTGGAAGAATTTGTCCACTACGTGAAAGGCGAGATCACCAAGGTAGTCGGCAAATAACTGTCAG<br/> ACCAAGTTTACTCATATATACTTTAGATTGATTTAAACTTCATTTTTAATTTAAAGGATCTAGGT<br/> GAAGATCCTTTTTGATAATCTCATGACCAAAATCCCTTAAACGTGAGTTTTTCGTTCCACTGAGCGTC<br/> AGACCCCGTAGAAAAGATCAAAGGATCTTCTTGAGATCCTTTTTTCTGCGCTAATCTGCTGCTT<br/> GCAAAACAAAAAACCCCGCTACCAGCGGTGGTTTTGTTTGGCGGATCAAGAGCTACCAACTCTTTT<br/> TCCGAAGGTAACCTGGCTTACGAGAGCGCAGATACCAATACTGTCCTTCTAGTGTAGCCGTAGTT</p>                                                                                                                                                                                                                                                                                                                                                                                                                                                                                                                                                                                                                                                                                                                                                                                                                                                                                                                                                                                                                                                                                                                                                                                                                                                                                            |

AGGCCACCACTTCAAGAACTCTGTAGCACCGCTACATACCTCGCTCTGCTAATCCTGTTACCAGT  
GGCTGCTGCCAGTGGCGATAAGTCGTGCTTACCGGGTTGGACTCAAGACGATAGTTACCGGATA  
AGGCGCAGCGGTCCGGCTGAACGGGGGGTTCGTGCACACAGCCCAGCTTGGAGCGAACGACCTA  
CACCGAACTGAGATACCTACAGCGTGAGCTATGAGAAAAGCGCCACGCTTCCCGAAGGGAGAAAAG  
CGGACAGGTATCCGGTAAGCGGCAGGGTCGGAACAGGAGAGCGCACGAGGGAGCTTCCAGGGGG  
AAACGCCTGGTATCTTTATAGTCCTGTCGGGTTTCGCCACCTCTGACTTGAGCGTCGATTTTTGTG  
ATGCTCGTCAGGGGGGGCGGAGCCTATGGAAAAACGCCAGCAACGGGGCCTTTTTACGGTTCCTGG  
CCTTTTGTGGCCTTTTGTCTACATGTTCTTTCCTGCGTTATCCCCTGATTCTGTGGATAACCGTAT  
TACCGCCTTTGAGTGAGCTGATAACCGCTCGCCGAGCCGAACGACCGAGCGCAGCGAGTCAGTGA  
GCGAGGAAGCGGAAGAGCGCCCAATACGCAAACCGCCTTCCCCGCGGTTGGCCGATTATTAA  
TGCAGCTGGCAGCACAGGTTTCCCGACTGGAAAAGCGGGCAGTGAGCGCAACGCAATTAATGTGAG  
TTAGTCACTCATTAGGCACCCAGGCTTTACACTTATGCTTCCGGCTCGTATGTTGTGGAAT  
TGTGAGCGGATAACAATTTACACAGGAAACAGCTATGACCATGATTACGCCAAGCTTGCATGCCT  
GCAGGTCGACTCTAGAGGATCCCCTTGAAGACAAAAGACGAATTCGATATCGCACATGTGACCGAG  
GGATTGTCTTCGTGGAAACTTGGGACTTCAGATTCCACCCCTTGCAAGCGTGGAAAAGCCTTCCGAC  
CAAGGGAAGTGTCCGATGTAGAGGAAATGGAAAGTTTGTTCAGATGGGGACTTGCTTGATTGC  
TTCACAAGAATGCCAGCTTATGCGGTAACCGCAGAGGAAGATTTAGCTGCAATCAGGAAAAACGCC  
CGAGATGGATGTCGGTCAAGAAGTTAAAGAACCTGCAGGAGACAGAAATCAATACTCAAACCTG  
CAGAACTTTCCTCAACAAGCTCCACAGGAAACACAGTAGGGAGGTGAAACACCAGGCCCAAAG  
AAAGCTAAACGCCTAGCTGAAATCCAGGAGTCAATGAGAGCTGAAGGTGATGCCGAACCAAATGA  
AATAAGCGGGGGCATGGGGGCAATACCCAGCAACGCCGAACTTCTGGGGCCAAA

## REFERENCES

1. Hockemeyer, D. *et al. Nat Biotechnol* **27**, 851–857 (2009).
2. Thyagarajan, B. *et al. Molecular and Cellular Biology* **21**, 3926–3934 (2001).
3. Olivares, E. C. *et al. Gene* **278**, 167–176 (2001).
4. Fukushige, S., Fukushige, S., Sauer, B. & Sauer, B. *Proc Natl Acad Sci USA* **89**, 7905–7909 (1992).
5. O'Gorman, S., Fox, D. T. & Wahl, G. M. *Science* **251**, 1351–1355 (1991).
